# Supplementary material for: Evaluation of the global impacts of mitigation on persistent, bioaccumulative and toxic pollutants in marine fish
Source: PeerJ journal article supplement (doi:10.7717/peerj.1573), 2016-01-28
Supplement: Supplemental_Files_Final_11-12-2015.pdf [file Supplemental_Files_Final_11-12-2015.pdf]

## Supplemental Material

### Evaluation of the global impacts of mitigation on persistent, bioaccumulative and toxic pollutants in marine fish.

Lindsay T. Bonito, Amro Hamdoun, Stuart A. Sandin

Marine Biology Research Department, Scripps Institution of Oceanography, 9500 Gilman Drive, La Jolla, CA 92093-0202, USA

#### Table of Contents

|                                                                       |    |
|-----------------------------------------------------------------------|----|
| Supplemental Figure 1: Regional Data Distribution.....                | 2  |
| Supplemental Figure 2: Habitat Data Distribution.....                 | 3  |
| Supplemental Figure 3: Regional Temporal Analysis.....                | 4  |
| Supplemental Table 1: Sample Sizes and Data Distribution.....         | 5  |
| Supplemental Table 2: ANOVA Summary Table (Figure 2).....             | 6  |
| Supplemental Table 3: ANOVA Summary Table (Figure 3).....             | 6  |
| Supplemental Table 4: ANOVA Summary Table (Figure 4).....             | 7  |
| Supplemental Table 5: Linear Regression Summary (Figure 5).....       | 7  |
| Supplemental Table 6: Linear Regression Summary, Years 1990-2012..... | 7  |
| Supplemental Table 7: Species List.....                               | 8  |
| Supplemental Table 8: Seafood Database Reference List.....            | 26 |

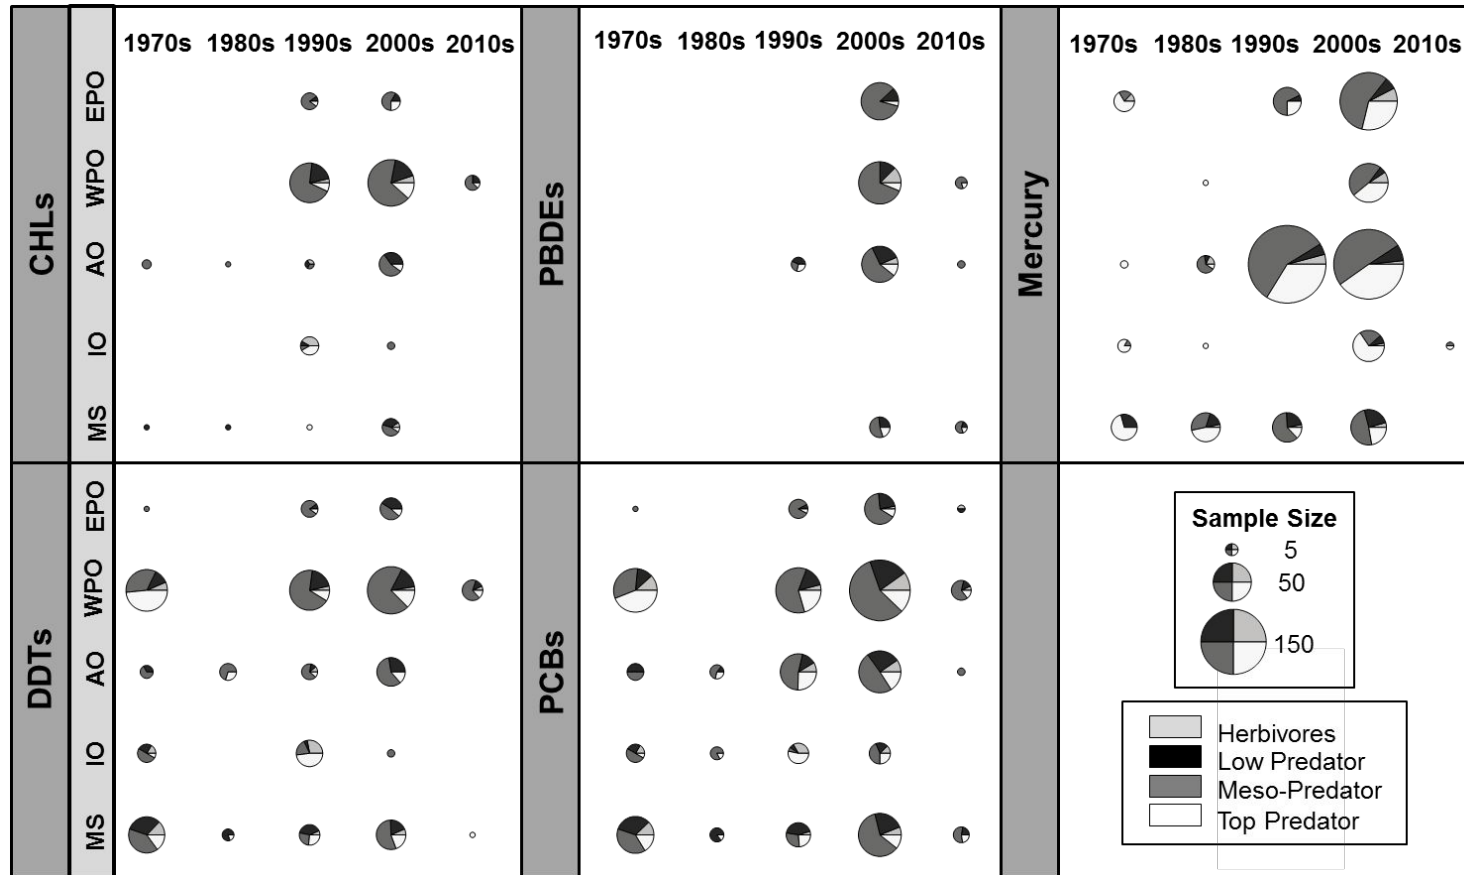

**Supplemental Figure 1: Regional Data Distribution.** Data distribution across pollutant groups, regions, and decades. Size of pie chart reflects number of data points included in analysis for each region. 5 global regions aggregated: EPO- East Pacific Ocean; WPO- West Pacific Ocean; AO- Atlantic Ocean; IO- Indian Ocean; MS- Mediterranean Sea.

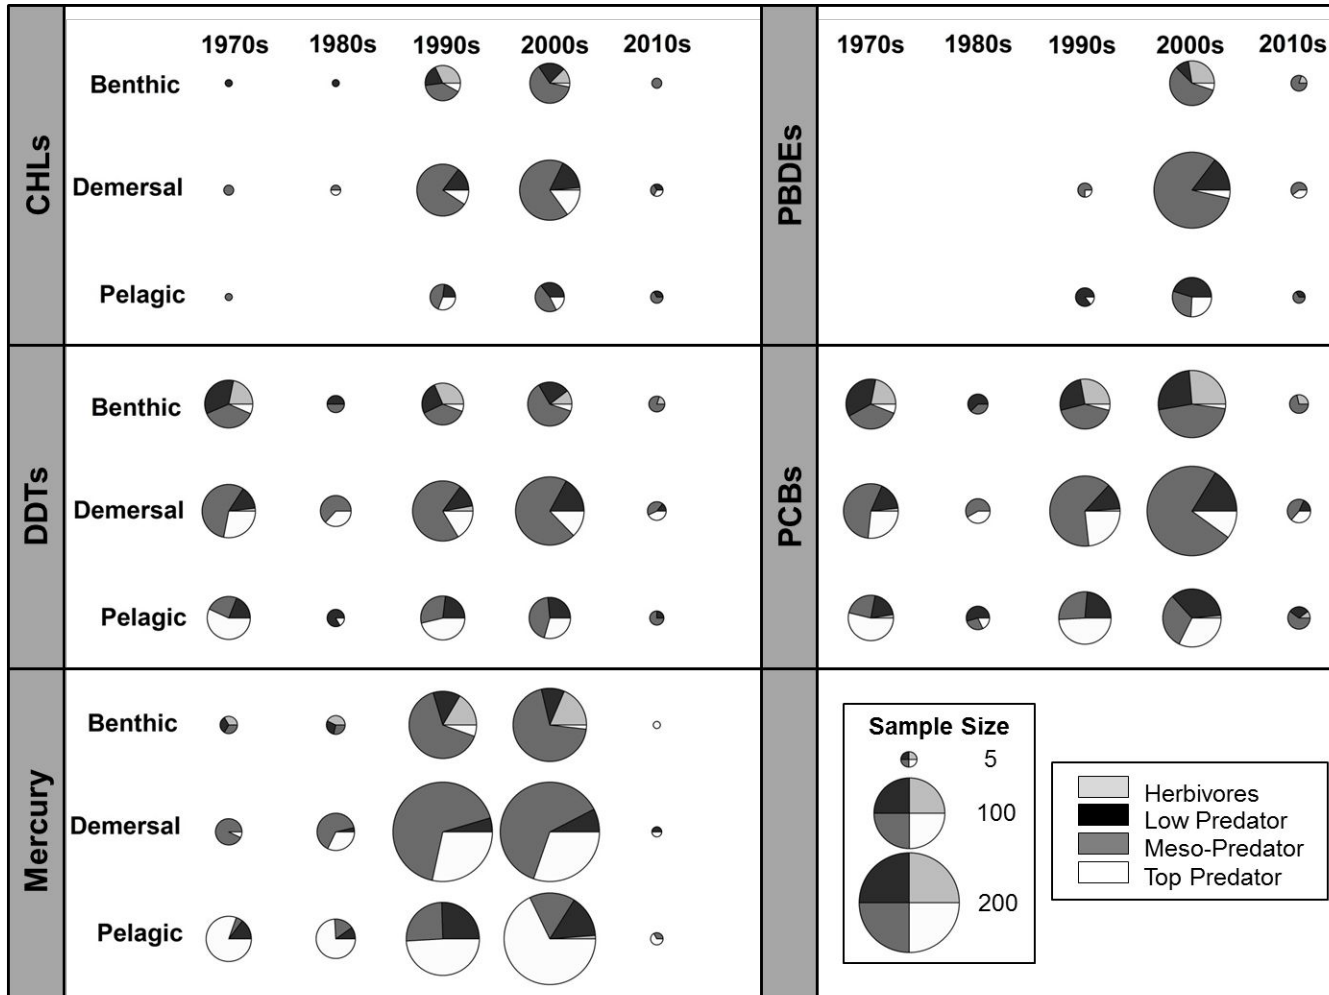

**Supplemental Figure 2: Habitat Data Distribution.** Data distribution across pollutant groups, feeding behavior, and decades. Size of pie chart reflects number of data points included in analysis for each feeding type per decade. Three feeding types were determined: benthic, demersal, and pelagic.

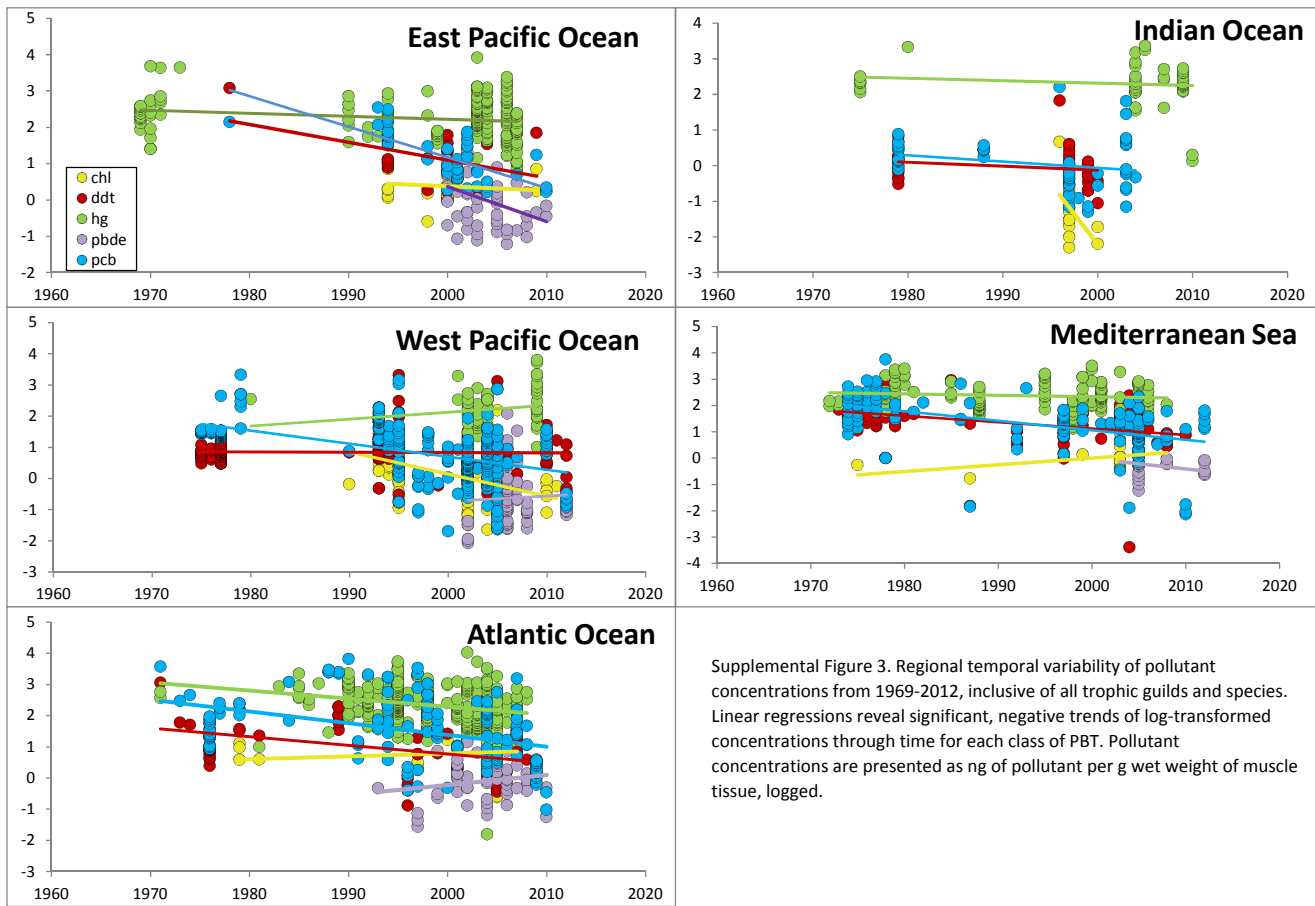

Supplemental Figure 3. Regional temporal variability of pollutant concentrations from 1969-2012, inclusive of all trophic guilds and species. Linear regressions reveal significant, negative trends of log-transformed concentrations through time for each class of PBT. Pollutant concentrations are presented as ng of pollutant per g wet weight of muscle tissue, logged.

| Chem | Region | df  | R <sup>2</sup> | slope      | F-stat  | Pr(>F)   |
|------|--------|-----|----------------|------------|---------|----------|
| CHL  | EPO    | 20  | 0.01           | -0.01186   | 0.2561  | 0.6183   |
|      | WPO    | 138 | 0.2322         | -0.07097   | 41.73   | >0.001   |
|      | AO     | 26  | 0.01138        | 0.009214   | 0.2992  | 0.5891   |
|      | IO     | 12  | 0.2699         | -0.3451    | 4.436   | 0.05692  |
|      | MS     | 12  | 0.2269         | 0.02531    | 3.523   | 0.08505  |
| DDT  | EPO    | 26  | 0.1686         | -0.04914   | 5.273   | 0.02997  |
|      | WPO    | 205 | 0.000381       | -0.0009433 | 0.07818 | 0.7801   |
|      | AO     | 63  | 0.1821         | -0.027785  | 14.03   | 0.000393 |
|      | IO     | 37  | 0.03753        | -0.011032  | 1.443   | 0.2373   |
|      | MS     | 93  | 0.1522         | -0.024387  | 16.7    | >0.001   |
| Hg   | EPO    | 172 | 0.03252        | -0.008151  | 5.782   | 0.01725  |
|      | WPO    | 53  | 0.02444        | 0.02209    | 1.328   | 0.2544   |
|      | AO     | 493 | 0.06569        | -0.025769  | 34.66   | >0.001   |
|      | IO     | 42  | 0.01668        | -0.006703  | 0.7126  | 0.4034   |
|      | MS     | 128 | 0.01139        | -0.005485  | 1.475   | 0.2268   |
| PBDE | EPO    | 51  | 0.1441         | -0.09622   | 8.586   | 0.005058 |
|      | WPO    | 73  | 0.001761       | 0.0165     | 0.1287  | 0.7208   |
|      | AO     | 52  | 0.03404        | 0.03177    | 1.832   | 0.1817   |
|      | IO     | -   | -              | -          | -       | -        |
|      | MS     | 18  | 0.05117        | -0.03922   | 0.9708  | 0.3375   |
| PCB  | EPO    | 41  | 0.4963         | -0.08425   | 40.4    | >0.001   |
|      | WPO    | 284 | 0.2857         | -0.041799  | 113.6   | >0.001   |
|      | AO     | 136 | 0.1663         | -0.037775  | 27.13   | >0.001   |
|      | IO     | 47  | 0.05098        | -0.01769   | 2.525   | 0.1188   |
|      | MS     | 140 | 0.2467         | -0.036032  | 45.85   | >0.001   |

**Supplemental Table 1.** Summary of data distribution

| REGION | DECADE | TROPIC LEVELS |   |    |    | TOTAL |    |
|--------|--------|---------------|---|----|----|-------|----|
|        |        | H             | P | MP | TP |       |    |
| CHL    | EPO    | 1970          | - | -  | -  | -     | -  |
|        |        | 1980          | - | -  | -  | -     | -  |
|        |        | 1990          | - | 1  | 8  | 1     | 10 |
|        |        | 2000          | - | 2  | 7  | 3     | 12 |
|        |        | 2010          | - | -  | -  | -     | -  |
|        | WPO    | 1970          | - | -  | -  | -     | -  |
|        |        | 1980          | - | -  | -  | -     | -  |
|        |        | 1990          | 2 | 11 | 39 | 4     | 56 |
|        |        | 2000          | 4 | 13 | 51 | 9     | 77 |
|        |        | 2010          | - | 2  | 5  | 1     | 8  |
|        | AO     | 1970          | - | -  | 3  | -     | 3  |
|        |        | 1980          | - | -  | 1  | -     | 1  |
|        |        | 1990          | 1 | 1  | 1  | -     | 3  |
|        |        | 2000          | - | 7  | 11 | 2     | 20 |
|        |        | 2010          | - | -  | -  | -     | -  |
|        | IO     | 1970          | - | -  | -  | -     | -  |
|        |        | 1980          | - | -  | -  | -     | -  |
|        |        | 1990          | 5 | 1  | 1  | 5     | 12 |
|        |        | 2000          | - | -  | 2  | -     | 2  |
|        |        | 2010          | - | -  | -  | -     | -  |
| MS     | 1970   | -             | 1 | -  | -  | 1     |    |
|        | 1980   | -             | 1 | -  | -  | 1     |    |
|        | 1990   | -             | - | -  | 1  | 1     |    |
|        | 2000   | 1             | 4 | 5  | 1  | 11    |    |
|        | 2010   | -             | - | -  | -  | -     |    |

| REGION | DECADE | TROPIC LEVELS |    |    |    | TOTAL |    |
|--------|--------|---------------|----|----|----|-------|----|
|        |        | H             | P  | MP | TP |       |    |
| DDT    | EPO    | 1970          | -  | -  | 1  | -     | 1  |
|        |        | 1980          | -  | -  | -  | -     | -  |
|        |        | 1990          | -  | 1  | 8  | 1     | 10 |
|        |        | 2000          | -  | 7  | 8  | 2     | 17 |
|        |        | 2010          | -  | -  | -  | -     | -  |
|        | WPO    | 1970          | 4  | 7  | 21 | 30    | 62 |
|        |        | 1980          | -  | -  | -  | -     | -  |
|        |        | 1990          | 2  | 11 | 39 | 5     | 57 |
|        |        | 2000          | 2  | 12 | 56 | 10    | 80 |
|        |        | 2010          | 1  | 2  | 10 | 2     | 15 |
|        | AO     | 1970          | -  | 2  | 4  | -     | 6  |
|        |        | 1980          | -  | -  | 7  | 3     | 10 |
|        |        | 1990          | 1  | 1  | 6  | 1     | 9  |
|        |        | 2000          | -  | 8  | 17 | 4     | 29 |
|        |        | 2010          | -  | -  | -  | -     | -  |
|        | IO     | 1970          | 2  | 3  | 6  | 1     | 12 |
|        |        | 1980          | -  | -  | -  | -     | -  |
|        |        | 1990          | 7  | 1  | 5  | 12    | 25 |
|        |        | 2000          | -  | -  | 2  | -     | 2  |
|        |        | 2010          | -  | -  | -  | -     | -  |
| MS     | 1970   | 6             | 15 | 19 | 7  | 47    |    |
|        | 1980   | -             | 4  | -  | 1  | 5     |    |
|        | 1990   | 1             | 6  | 4  | 4  | 15    |    |
|        | 2000   | 2             | 6  | 17 | 6  | 31    |    |
|        | 2010   | -             | -  | -  | 1  | 1     |    |

| REGION | DECADE | TROPIC LEVELS |   |    |    | TOTAL |    |
|--------|--------|---------------|---|----|----|-------|----|
|        |        | H             | P | MP | TP |       |    |
| PBDE   | EPO    | 1970          | - | -  | -  | -     | -  |
|        |        | 1980          | - | -  | -  | -     | -  |
|        |        | 1990          | - | -  | -  | -     | -  |
|        |        | 2000          | - | 6  | 42 | 2     | 50 |
|        |        | 2010          | - | -  | -  | -     | -  |
|        | WPO    | 1970          | - | -  | -  | -     | -  |
|        |        | 1980          | - | -  | -  | -     | -  |
|        |        | 1990          | - | -  | -  | -     | -  |
|        |        | 2000          | 8 | 8  | 44 | 4     | 64 |
|        |        | 2010          | - | -  | 4  | 1     | 5  |
|        | AO     | 1970          | - | -  | -  | -     | -  |
|        |        | 1980          | - | -  | -  | -     | -  |
|        |        | 1990          | - | 3  | 2  | 2     | 7  |
|        |        | 2000          | 3 | 12 | 27 | 5     | 47 |
|        |        | 2010          | - | -  | 2  | -     | 2  |
|        | IO     | 1970          | - | -  | -  | -     | -  |
|        |        | 1980          | - | -  | -  | -     | -  |
|        |        | 1990          | - | -  | -  | -     | -  |
|        |        | 2000          | - | -  | -  | -     | -  |
|        |        | 2010          | - | -  | -  | -     | -  |
| MS     | 1970   | -             | - | -  | -  | -     |    |
|        | 1980   | -             | - | -  | -  | -     |    |
|        | 1990   | -             | - | -  | -  | -     |    |
|        | 2000   | -             | 4 | 8  | 3  | 15    |    |
|        | 2010   | -             | 1 | 3  | 1  | 5     |    |

| REGION | DECADE | TROPIC LEVELS |    |    |    | TOTAL |     |
|--------|--------|---------------|----|----|----|-------|-----|
|        |        | H             | P  | MP | TP |       |     |
| PCB    | EPO    | 1970          | -  | -  | 1  | -     | 1   |
|        |        | 1980          | -  | -  | -  | -     | -   |
|        |        | 1990          | -  | 1  | 11 | 1     | 13  |
|        |        | 2000          | 1  | 8  | 22 | 3     | 34  |
|        |        | 2010          | 1  | 1  | -  | -     | 2   |
|        | WPO    | 1970          | 8  | 8  | 22 | 30    | 68  |
|        |        | 1980          | -  | -  | -  | -     | -   |
|        |        | 1990          | 3  | 11 | 44 | 15    | 73  |
|        |        | 2000          | 13 | 27 | 76 | 16    | 132 |
|        |        | 2010          | 1  | 2  | 9  | 2     | 14  |
|        | AO     | 1970          | -  | 5  | 5  | -     | 10  |
|        |        | 1980          | -  | 1  | 4  | 2     | 7   |
|        |        | 1990          | 4  | 6  | 25 | 12    | 47  |
|        |        | 2000          | 6  | 16 | 31 | 10    | 63  |
|        |        | 2010          | -  | -  | 2  | -     | 2   |
|        | IO     | 1970          | 2  | 3  | 6  | 1     | 12  |
|        |        | 1980          | -  | -  | 5  | 1     | 6   |
|        |        | 1990          | 5  | 1  | 1  | 8     | 15  |
|        |        | 2000          | 2  | 3  | 7  | 4     | 16  |
|        |        | 2010          | -  | -  | -  | -     | -   |
| MS     | 1970   | 6             | 16 | 19 | 8  | 49    |     |
|        | 1980   | -             | 6  | -  | 1  | 7     |     |
|        | 1990   | 1             | 9  | 6  | 5  | 21    |     |
|        | 2000   | 4             | 15 | 40 | 7  | 66    |     |
|        | 2010   | -             | 2  | 5  | 2  | 9     |     |

| REGION | DECADE | TROPIC LEVELS |    |    |     | TOTAL |     |
|--------|--------|---------------|----|----|-----|-------|-----|
|        |        | H             | P  | MP | TP  |       |     |
| Hg     | EPO    | 1970          | 2  | -  | 3   | 10    | 15  |
|        |        | 1980          | -  | -  | -   | -     | -   |
|        |        | 1990          | -  | 2  | 19  | 7     | 28  |
|        |        | 2000          | 9  | 8  | 67  | 34    | 118 |
|        |        | 2010          | -  | -  | -   | -     | -   |
|        | WPO    | 1970          | -  | -  | -   | -     | -   |
|        |        | 1980          | -  | -  | -   | 1     | 1   |
|        |        | 1990          | -  | -  | -   | -     | -   |
|        |        | 2000          | 5  | 3  | 25  | 21    | 54  |
|        |        | 2010          | -  | -  | -   | -     | -   |
|        | AO     | 1970          | -  | -  | -   | 2     | 2   |
|        |        | 1980          | 2  | 1  | 7   | 1     | 11  |
|        |        | 1990          | 9  | 10 | 124 | 73    | 216 |
|        |        | 2000          | 3  | 13 | 88  | 70    | 174 |
|        |        | 2010          | -  | -  | -   | -     | -   |
|        | IO     | 1970          | -  | -  | 1   | 5     | 6   |
|        |        | 1980          | -  | -  | -   | 1     | 1   |
|        |        | 1990          | -  | -  | -   | -     | -   |
|        |        | 2000          | 1  | 3  | 8   | 23    | 35  |
|        |        | 2010          | -  | -  | 1   | 1     | 2   |
| MS     | 1970   | -             | 7  | -  | 17  | 24    |     |
|        | 1980   | 1             | 5  | 10 | 14  | 30    |     |
|        | 1990   | 1             | 7  | 19 | 4   | 31    |     |
|        | 2000   | 2             | 11 | 22 | 10  | 45    |     |
|        | 2010   | -             | -  | -  | -   | -     |     |

**Regions:** EPO-East Pacific Ocean; WPO- West Pacific Ocean; AO- Atlantic Ocean; IO- Indian Ocean; MS- Mediterranean Sea  
**Trophic Levels:** H- Herbivore; P- Primary Predator; MP- Middle Predator; TP- Top Predator

**Supplemental Table 2.** Summary data from analyses presented in Figure 2

|             | df     | Pr(>F)     |   |
|-------------|--------|------------|---|
| <b>Hg</b>   | 4, 790 | 0.753      |   |
| <b>CHL</b>  | 4, 207 | p < 0.001  | * |
| <b>DDT</b>  | 4, 275 | 0.625      |   |
| <b>PBDE</b> | 3, 198 | 0.697      |   |
| <b>PCB</b>  | 4, 483 | p < 0.0001 | * |

**Supplemental Table 3.** Summary data from analyses presented in Figure 3

|                      |             | df     | Pr(>F) |    | Region N-values |            |           |           |           |
|----------------------|-------------|--------|--------|----|-----------------|------------|-----------|-----------|-----------|
|                      |             |        |        |    | <i>EPO</i>      | <i>WPO</i> | <i>AO</i> | <i>IO</i> | <i>MS</i> |
| <b>Herbivores</b>    | <i>CHL</i>  | 3, 9   | 0.322  |    | -               | 6          | 1         | 5         | 1         |
|                      | <i>DDT</i>  | 3, 11  | 0.032  |    | -               | 4          | 1         | 7         | 3         |
|                      | <i>Hg</i>   | 4, 32  | 0.008  | ** | 9               | 5          | 19        | 1         | 3         |
|                      | <i>PBDE</i> | 1, 12  | 0.333  |    | -               | 11         | 3         | -         | -         |
|                      | <i>PCB</i>  | 4, 36  | 0.288  |    | 2               | 17         | 10        | 7         | 5         |
| <b>Low Predators</b> | <i>CHL</i>  | 4, 37  | 0.341  |    | 3               | 26         | 8         | 1         | 4         |
|                      | <i>DDT</i>  | 4, 49  | 0.476  |    | 8               | 25         | 8         | 1         | 12        |
|                      | <i>Hg</i>   | 4, 60  | 0.457  |    | 10              | 3          | 31        | 3         | 18        |
|                      | <i>PBDE</i> | 3, 32  | 0.374  |    | 8               | 8          | 15        | -         | 5         |
|                      | <i>PCB</i>  | 4, 94  | 0.309  |    | 8               | 40         | 21        | 4         | 26        |
| <b>Mid Predators</b> | <i>CHL</i>  | 4, 125 | 0.123  |    | 19              | 95         | 12        | 3         | 5         |
|                      | <i>DDT</i>  | 4, 159 | 0.311  |    | 16              | 101        | 21        | 7         | 19        |
|                      | <i>Hg</i>   | 4, 412 | 0.165  |    | 86              | 25         | 256       | 9         | 41        |
|                      | <i>PBDE</i> | 3, 129 | 0.153  |    | 43              | 50         | 29        | -         | 11        |
|                      | <i>PCB</i>  | 4, 260 | 0.161  |    | 29              | 129        | 55        | 8         | 44        |
| <b>Top Predators</b> | <i>CHL</i>  | 4, 22  | 0.11   |    | 4               | 13         | 3         | 5         | 2         |
|                      | <i>DDT</i>  | 4, 42  | 0.177  |    | 3               | 15         | 6         | 12        | 11        |
|                      | <i>Hg</i>   | 4, 271 | 0.449  |    | 41              | 21         | 176       | 24        | 14        |
|                      | <i>PBDE</i> | 3, 15  | 0.261  |    | 2               | 6          | 7         | -         | 4         |
|                      | <i>PCB</i>  | 4, 78  | 0.105  |    | 3               | 32         | 22        | 12        | 14        |

**Supplemental Table 4.** Summary data from analyses presented in Figure 4

|      |                | df     | Pr(>F)    |    |
|------|----------------|--------|-----------|----|
| Hg   | <i>Trophic</i> | 3, 791 | p < 0.001 | ** |
|      | <i>Habitat</i> | 2, 792 | p < 0.001 | ** |
| CHL  | <i>Trophic</i> | 3, 208 | 0.494     |    |
|      | <i>Habitat</i> | 2, 209 | 0.311     |    |
| DDT  | <i>Trophic</i> | 3, 276 | 0.142     |    |
|      | <i>Habitat</i> | 2, 277 | 0.352     |    |
| PBDE | <i>Trophic</i> | 3, 198 | 0.087     |    |
|      | <i>Habitat</i> | 2, 199 | 0.155     |    |
| PCB  | <i>Trophic</i> | 3, 484 | 0.466     |    |
|      | <i>Habitat</i> | 2, 485 | 0.222     |    |

**Supplemental Table 5.** Summary data from analyses presented in Figure 5

|      | df  | R <sup>2</sup> | slope | F-stat | Pr(>F)    |   |
|------|-----|----------------|-------|--------|-----------|---|
| CHL  | 229 | 0.02           | -0.02 | 5.121  | 0.02      | * |
| DDT  | 488 | 0.06           | -0.02 | 31.17  | p < 0.001 | * |
| Hg   | 997 | 0.03           | -0.01 | 27.6   | p < 0.001 | * |
| PBDE | 216 | 0.01           | -0.03 | 4.155  | 0.04      | * |
| PCB  | 722 | 0.17           | -0.04 | 151.4  | p < 0.001 | * |

**Supplemental Table 6:** Subset of summary data from analyses presented in Figure 5 (years 1990-2012)

|      | df  | R <sup>2</sup> | slope  | F-stat | Pr(>F)    |   |
|------|-----|----------------|--------|--------|-----------|---|
| CHL  | 223 | 0.02           | -0.02  | 4.911  | 0.03      | * |
| DDT  | 318 | 0.00           | -0.004 | 0.245  | 0.62      |   |
| Hg   | 893 | 0.02           | -0.015 | 15.51  | p < 0.001 | * |
| PBDE | 216 | 0.02           | -0.03  | 4.155  | 0.042     | * |
| PCB  | 542 | 0.09           | -0.06  | 52.36  | p < 0.001 | * |

Supplemental Table 7.

Summary of species information &amp; attributes in database

| Common Name            | Scientific Name                       | Trophic Level  | Trophic Guild | Habitat        |
|------------------------|---------------------------------------|----------------|---------------|----------------|
| wahoo                  | <i>Acanthocybium solandri</i>         | 4.4 ± 0.8      | TP            | Pelagic        |
| yellowfin goby         | <i>Acanthogobius flavimanus</i>       | 3.3 ± 0.4      | P             | Benthic        |
| St. Paul's fingerfin   | <i>Acantholatris monodactylus</i>     | 3.5 ± 0.41     | MP            | Demersal       |
| yellowfin bream        | <i>Acanthopagrus australis</i>        | 3.1 ± 0.4      | MP            | Demersal       |
| picnic seabream        | <i>Acanthopagrus berda</i>            | 3.5 ± 0.6      | MP            | Benthic        |
| yellowfin seabream     | <i>Acanthopagrus latus</i>            | 3.2 ± 0.5      | P             | Demersal       |
| black seabream         | <i>Acanthopagrus schlegel</i>         | 3.2 ± 0.45     | P             | Demersal       |
| yellowfin surgeonfish  | <i>Acanthurus xanthopterus</i>        | 2.9 ± 0.36     | H             | Benthic        |
| goby                   | <i>Acentrogobius janthinopterus</i>   | 2.5 ± 0.5      | H             | Benthic        |
| shortnose sturgeon     | <i>Acipenser brevirostrum</i>         | 3.3 ± 0.39     | MP            | Benthic        |
| Russian sturgeon       | <i>Acipenser gueldenstaedtii</i>      | 3.1 ± 0.3      | MP            | Benthic        |
| ship sturgeon          | <i>Acipenser nudiiventris</i>         | 3.3 ± 0.45     | MP            | Benthic        |
| Persian sturgeon       | <i>Acipenser persicus</i>             | 3.7 ± 0.59     | MP            | Demersal       |
| stellate sturgeon      | <i>Acipenser stellatus</i>            | 3.5 ± 0.2      | MP            | Demersal       |
| white sturgeon         | <i>Acipenser transmontanus</i>        | 3.2 ± 0.4      | MP            | Demersal       |
| glowbelly              | <i>Acropoma japonica</i>              | 3.3 ± 0.4      | P             | Demersal       |
| giant grenadier        | <i>Albatrossia pectoralis</i>         | 4.3 ± 0.8      | P             | Demersal       |
| bonefish               | <i>Albula vulpes</i>                  | 3.7 ± 0.3      | TP            | Benthic        |
| rainbow sculpin        | <i>Alcichthys alcicornis</i>          | 3.6 ± 0.6      | MP            | Demersal       |
| shrimp scad            | <i>Alepes djedaba</i>                 | 3.3 ± 0.47     | MP            | Pelagic        |
| Risso's smoothhead     | <i>Alepocephalus rostratus</i>        | 3.5 ± 0.5      | MP            | Pelagic        |
| pelagic thresher shark | <i>Alopias pelagicus</i>              | 4.5 ± 0.66     | TP            | Pelagic        |
| <b>thresher sharks</b> | <b><i>Alopias spp.</i></b>            | <b>4.5 ± 0</b> | <b>TP</b>     | <b>Pelagic</b> |
| bigeye thresher shark  | <i>Alopias superciliosus</i>          | 4.5 ± 0.8      | TP            | Pelagic        |
| thresher shark         | <i>Alopias vulpinus</i>               | 4.5 ± 0        | TP            | Pelagic        |
| allis shad             | <i>Alosa alosa</i>                    | 3.6 ± 0.53     | MP            | Pelagic        |
| alewife                | <i>Alosa pseudoharengus</i>           | 3.5 ± 0.5      | P             | Demersal       |
| glass perchlet         | <i>Ambassis vachellii</i>             | 2.5 ± 0.5      | H             | Demersal       |
| gobies                 | <i>Amblychaeturichthys sciiistius</i> | 3.3 ± 0.4      | P             | Demersal       |
| starry ray             | <i>Amblyraja radiata</i>              | 4.2 ± 0.3      | TP            | Benthic        |
| lesser sand eel        | <i>Ammodytes tobianus</i>             | 3.1 ± 0.3      | P             | Demersal       |
| Northern wolffish      | <i>Anarhichas denticulatus</i>        | 3.8 ± 0.46     | MP            | Demersal       |
| Atlantic wolffish      | <i>Anarhichas lupus</i>               | 3.8 ± 0.46     | MP            | Demersal       |
| spp..otted wolffish    | <i>Anarhichas minor</i>               | 3.5 ± 0.4      | MP            | Benthic        |
| frys                   | <i>Anchoa choerostoma</i>             | 3.3 ± 0.4      | P             | Pelagic        |
| anchovy                | <i>Anchoa mitchilli</i>               | 3.5 ± 0.5      | P             | Demersal       |
| eel                    | <i>Anguilla anguilla</i>              | 3.5 ± 0.6      | MP            | Benthic        |
| Japanese eel           | <i>Anguilla japonica</i>              | 3.6 ± 0.51     | MP            | Demersal       |
| American eel           | <i>Anguilla rostrata</i>              | 3.7 ± 0.6      | MP            | Demersal       |
| eel                    | <i>Anguilla spp</i>                   | 3.7 ± 0.6      | MP            | Demersal       |
| chacuna gizzardshad    | <i>Anodontostoma chacunda</i>         | 2.8 ± 0.8      | H             | Benthic        |
| sablefish              | <i>Anoplopoma fimbria</i>             | 3.8 ± 0.6      | MP            | Demersal       |
| black scabbard         | <i>Aphanopus carbo</i>                | 4.5 ± 0.77     | TP            | Pelagic        |
| cardinalfish           | <i>Apogon hyalosoma</i>               | 2.5 ± 0.5      | H             | Benthic        |



|                             |                                     |                  |           |                 |
|-----------------------------|-------------------------------------|------------------|-----------|-----------------|
| cardinal fish; Indian perch | <i>Apogon lineatus</i>              | 3.7 ± 0.6        | P         | Benthic         |
| sheepshead                  | <i>Archosargus probatocephalus</i>  | 3.5 ± 0.53       | MP        | Benthic         |
| Western Atlantic seabream   | <i>Archosargus rhomboidalis</i>     | 2.9 ± 0.1        | P         | Benthic         |
| polar cod                   | <i>Arctogadus glacialis</i>         | 3.8 ± 0.61       | MP        | Demersal        |
| small mouth argentine       | <i>Argentina kagoshimae</i>         | 3.4 ± 0.4        | MP        | Benthic         |
| king soldier bream          | <i>Argyrops spinifer</i>            | 4.5 ± 0.8        | TP        | Benthic         |
| conger eel                  | <i>Ariosoma shiroanago major</i>    | 4 ± 0.67         | TP        | Demersal        |
| hardhead catfish            | <i>Arius felis</i>                  | 3.3 ± 0.6        | MP        | Demersal        |
| giant catfish               | <i>Arius serratus</i>               | 3.1 ± 0.3        | P         | Benthic         |
| Chinese catfish             | <i>Arius sinensis</i>               | 3.9 ± 0.66       | MP        | Benthic         |
| giant sea catfish           | <i>Arius thalassinus</i>            | 3.1 ± 0.3        | P         | Demersal        |
| scaldfish                   | <i>Arnoglossus laterna</i>          | 3.6 ± 0.5        | MP        | Benthic         |
| red gurnard                 | <i>Aspitrigla cuculus</i>           | 3.9 ± 0.6        | MP        | Benthic         |
| jellynose fishes            | <i>Ateleopus japonicus</i>          | 4.2 ± 0.73       | MP        | Demersal        |
| sand smelt                  | <i>Atherina presbyter</i>           | 3.7 ± 0.43       | P         | Pelagic         |
| topsmelt                    | <i>Atherinops affinis</i>           | 2.8 ± 0.28       | H         | Pelagic         |
| jacksmelt                   | <i>Atherinopsis californiensis</i>  | 3.1 ± 0.5        | P         | Pelagic         |
| cleftbelly trevally         | <i>Atropus atropus</i>              | 3.6 ± 0.52       | MP        | Pelagic         |
| Japanese thread sail fish   | <i>Aulopus japonicus</i>            | 4 ± 0.66         | MP        | Demersal        |
| frigate mackerel            | <i>Auxis thazard</i>                | 4.3 ± 0.7        | TP        | Pelagic         |
| gafftopsail sea catfish     | <i>Bagre marinus</i>                | 3.5 ± 0.5        | MP        | Demersal        |
| silver perch                | <i>Bairdiella chrysoura</i>         | 3.2 ± 0.4        | P         | Benthic         |
| grey triggerfish            | <i>Balistes capricus</i>            | 4.1 ± 0.2        | MP        | Benthic         |
| titan triggerfish           | <i>Balistoides viridescens</i>      | 3.3 ± 0.44       | P         | Benthic         |
| <b>rattail fishes</b>       | <b><i>Bathygadus spp.</i></b>       | <b>3.2 ± 0.3</b> | <b>P</b>  | <b>Demersal</b> |
| spinytail skate             | <i>Bathyraja spinicauda</i>         | 4.4 ± 0.6        | TP        | Benthic         |
| <b>temperate perches</b>    | <b><i>Bathysphryaenops spp.</i></b> | <b>3.9 ± NA</b>  | <b>MP</b> | <b>Demersal</b> |
| deepwater flatheads         | <i>Bembras japonica</i>             | 3.6 ± 0.6        | MP        | Demersal        |
| alfonsino                   | <i>Beryx splendens</i>              | 4.3 ± 0.2        | MP        | Demersal        |
| goldenspot hogfish          | <i>Bodianus perditio</i>            | 4.1 ± 0          | MP        | Benthic         |
| green humphead parrotfish   | <i>Bolbometopon muricatum</i>       | 2.7 ± 0.41       | H         | Benthic         |
| bogue                       | <i>Boops boops</i>                  | 2.8 ± 0          | P         | Benthic         |
| salema                      | <i>Boops salpa</i>                  | 2 ± 0            | H         | Benthic         |
| arctic cod                  | <i>Boreogadus saida</i>             | 3.1 ± 0.3        | P         | Pelagic         |
| soft eelpout                | <i>Bothrocara molle</i>             | 3.4 ± 0.5        | MP        | Demersal        |
| <b>flounders</b>            | <b><i>Bothus spp.</i></b>           | <b>4.4 ± 0</b>   | <b>MP</b> | <b>Benthic</b>  |
| spotted sole                | <i>Brachirius orientalis</i>        | 3.5 ± 0.37       | MP        | Benthic         |
| Atlantic pomfret            | <i>Brama brama</i>                  | 4.1 ± 0.64       | MP        | Pelagic         |
| menhaden                    | <i>Brevoortia patronus</i>          | 2.2 ± 0.07       | P         | Pelagic         |
| yellowfin menhaden          | <i>Brevoortia smithi</i>            | 2.3 ± 0          | P         | Pelagic         |
| Atlantic menhaden           | <i>Brevoortia tyrannus</i>          | 2.3 ± 0.2        | P         | Pelagic         |
| tusk                        | <i>Brosme brosme</i>                | 3.9 ± 0.3        | MP        | Benthic         |
| grenadiers                  | <i>Caelorinchus jordani</i>         | 3.5 ± 0.5        | MP        | Benthic         |
| spearnose grenadier         | <i>Caelorinchus multispinulosus</i> | 3.6 ± 0.5        | MP        | Benthic         |
| jolthead porgy              | <i>Calamus bajonado</i>             | 3.5 ± 0.2        | MP        | Demersal        |
| saucereye porgy             | <i>Calamus calamus</i>              | 3.5 ± 0.2        | MP        | Demersal        |
| dragonet                    | <i>Callionymus lyra</i>             | 3.3 ± 0.83       | P         | Demersal        |
| <b>jacks</b>                | <b><i>Carangidae spp.</i></b>       | <b>4.4 ± 0.8</b> | <b>TP</b> | <b>Pelagic</b>  |

|                                      |                                    |            |    |          |
|--------------------------------------|------------------------------------|------------|----|----------|
| yellow jack                          | <i>Carangoides bartholomaei</i>    | 4.5 ± 0.8  | TP | Pelagic  |
| malabar trevally                     | <i>Carangoides malabaricus</i>     | 4.4 ± 0.5  | TP | Pelagic  |
| yellow jack                          | <i>Caranx bartholomaei</i>         | 4.5 ± 0.8  | TP | Pelagic  |
| Pacific crevalle jack; crevalle jack | <i>Caranx caninus</i>              | 3.7 ± 0.56 | MP | Pelagic  |
| blue runner                          | <i>Caranx crysos</i>               | 4.4 ± 0.8  | MP | Pelagic  |
| blue runner                          | <i>Caranx fusus</i>                | 4.4 ± 0.8  | MP | Pelagic  |
| crevalle jack                        | <i>Caranx hippos</i>               | 3.5 ± 0.5  | MP | Demersal |
| giant trevally                       | <i>Caranx ignobilis</i>            | 4.2 ± 0.7  | TP | Pelagic  |
| malabar trevally                     | <i>Caranx malabaricus</i>          | 4.4 ± 0.5  | TP | Pelagic  |
| bluefin trevally                     | <i>Caranx melampygus</i>           | 4.5 ± 0.8  | TP | Pelagic  |
| bar jack                             | <i>Caranx ruber</i>                | 4.3 ± 0.1  | MP | Demersal |
| blacktip trevally                    | <i>Caranx sem</i>                  | 3.7 ± 0.56 | MP | Pelagic  |
| bigeye trevally                      | <i>Caranx sexfasciatus</i>         | 4.5 ± 0.8  | MP | Pelagic  |
| blacknose shark                      | <i>Carcharhinus acronotus</i>      | 4.4 ± 0.5  | MP | Pelagic  |
| spinner shark                        | <i>Carcharhinus brevipinna</i>     | 4.2 ± 0.6  | MP | Pelagic  |
| silky shark                          | <i>Carcharhinus falciformis</i>    | 4.5 ± 0.6  | TP | Pelagic  |
| dusky shark (Galapagos)              | <i>Carcharhinus galapagensis</i>   | 4.2 ± 0.4  | TP | Pelagic  |
| finetooth shark                      | <i>Carcharhinus isodon</i>         | 4.2 ± 0.7  | MP | Pelagic  |
| bull shark                           | <i>Carcharhinus leucas</i>         | 4.3 ± 0.7  | TP | Pelagic  |
| blacktip shark                       | <i>Carcharhinus limbatus</i>       | 4.2 ± 0.7  | MP | Pelagic  |
| dusky shark                          | <i>Carcharhinus obscurus</i>       | 4.3 ± 0.2  | TP | Demersal |
| Caribbean reef shark                 | <i>Carcharhinus perezii</i>        | 4.5 ± 0.8  | TP | Pelagic  |
| sandbar shark                        | <i>Carcharhinus plumbeus</i>       | 4.5 ± 0    | TP | Demersal |
| night shark                          | <i>Carcharhinus signatus</i>       | 4.5 ± 0.4  | TP | Pelagic  |
| silky shark                          | <i>Carcharhinus falciformis</i>    | 4.5 ± 0.6  | TP | Pelagic  |
| great white shark                    | <i>Carcharodon carcharias</i>      | 4.5 ± 0.4  | TP | Pelagic  |
| sakebikunin                          | <i>Careproctus rastrinus</i>       | 3.3 ± 0.49 | MP | Demersal |
| ocean whitefish                      | <i>Caulolatilus princeps</i>       | 3.9 ± 0.6  | MP | Benthic  |
| rock seabass                         | <i>Centropristis philadelphica</i> | 3.9 ± 0.6  | MP | Demersal |
| gulper shark                         | <i>Centrophorus granulosus</i>     | 4.1 ± 0.7  | TP | Pelagic  |
| armed snook                          | <i>Centropomus armatus</i>         | 3.9 ± 0.7  | MP | Demersal |
| blackfin snook                       | <i>Centropomus medius</i>          | 4 ± 0.65   | MP | Demersal |
| black snook                          | <i>Centropomus nigrescens</i>      | 4.2 ± 0.8  | MP | Demersal |
| fat snook                            | <i>Centropomus parallelus</i>      | 4.2 ± 0.74 | TP | Demersal |
| common snook                         | <i>Centropomus undecimalis</i>     | 4.4 ± 0.8  | TP | Demersal |
| rock sea bass                        | <i>Centropristis philadelphica</i> | 3.9 ± 0.6  | MP | Demersal |
| black seabass                        | <i>Centropristis striata</i>       | 3.9 ± 0.2  | MP | Demersal |
| striped bass                         | <i>Centropristis striate</i>       | 4 ± 0.6    | MP | Demersal |
| blue spotted grouper                 | <i>Cephalopholis argus</i>         | 4.5 ± 0.8  | TP | Demersal |
| chocolate hind                       | <i>Cephalopholis boenak</i>        | 4.2 ± 0.7  | TP | Demersal |
| coney                                | <i>Cephalopholis fulva</i>         | 4.1 ± 0.7  | TP | Demersal |
| tomato hind                          | <i>Cephalopholis sonnerati</i>     | 3.8 ± 0.6  | MP | Demersal |
| red bandfish                         | <i>Cepola macrophthalma</i>        | 3.1 ± 0.23 | P  | Demersal |
| Warming's lantern fish               | <i>Ceratoscopelus warmingi</i>     | 3.4 ± 0.53 | MP | Pelagic  |
| spade                                | <i>Chaetodipterus faber</i>        | 4.5 ± 0    | MP | Benthic  |
| catfish                              | <i>Chaeturichthys stigmatias</i>   | 3.3 ± 0.4  | MP | Demersal |
| mackerel icefish                     | <i>Champscephalus gunnari</i>      | 3.2 ± 0.4  | MP | Pelagic  |

|                         |                              |                  |           |                 |
|-------------------------|------------------------------|------------------|-----------|-----------------|
| milkfish                | Chanos chanos                | 2 ± 0.1          | H         | Benthic         |
| lefteye flounder        | Chascanopsetta lugubris      | 3.5 ± 0.37       | MP        | Benthic         |
| sea toads               | Chaunax abei                 | 4.3 ± 0.6        | TP        | Demersal        |
| floral wrasse           | Cheilinus chlorourus         | 3.4 ± 0.5        | P         | Benthic         |
| redbreasted wrasse      | Cheilinus fasciatus          | 3.4 ± 0.4        | P         | Benthic         |
| tripletail wrasse       | Cheilinus trilobatus         | 3.5 ± 0.5        | P         | Benthic         |
| tub gurnard             | Chelidonichthys lucerna      | 3.7 ± 0.6        | MP        | Demersal        |
| thicklip grey mullet    | Chelon labrosus              | 2.6 ± 0.32       | H         | Demersal        |
| bamboo shark            | Chiloscyllium plagiosum      | 4 ± 0.67         | MP        | Benthic         |
| ghostshark              | Chimaera monstrosa           | 3.5 ± 0          | MP        | Benthic         |
| crocodile icefish       | Chionodraco hamatus          | 3.7 ± 0.6        | MP        | Demersal        |
| dorab wolfherring       | Chirocentrus dorab           | 4.5 ± 0.8        | TP        | Pelagic         |
| greeneyes               | Chlorophthalmus acutifrons   | 4 ± 0.67         | MP        | Demersal        |
| greeneyes               | Chlorophthalmus albatrossis  | 4.1 ± 0.69       | MP        | Demersal        |
| doublespotted queenfish | Chorinemus lysan             | 4.5 ± 0.8        | TP        | Pelagic         |
| fivebeard rockling      | Ciliata mustela              | 3.5 ± 0.6        | MP        | Demersal        |
| speckled sanddab        | Citharichthys stigmaeus      | 3.4 ± 0.52       | MP        | Demersal        |
| spotted founder         | Citharus linguatula          | 4 ± 0.65         | MP        | Demersal        |
| spotted flounder        | Citharus macrolepidotus      | 4 ± 0.65         | MP        | Demersal        |
| arrow goby              | Clevelandia ios              | 3.1 ± 0.42       | MP        | Benthic         |
| shad                    | Clupanodon punctatus         | 2.9 ± 0.22       | H         | Benthic         |
| Baltic herring          | Clupea harengus              | 3.2 ± 0.4        | P         | Pelagic         |
| white sea herring       | Clupea pallasii marisalbi    | 3.1 ± 0.3        | P         | Pelagic         |
| demon grenadier         | Coelorinchus gilberti        | 3.7 ± 0.5        | MP        | Benthic         |
| spearsnouted grenadier  | Coelorinchus labiatus        | 4 ± 0.65         | MP        | Demersal        |
| longarm grenadier       | Coelorinchus macrochir       | 3.8 ± 0.62       | MP        | Demersal        |
| ungaro                  | Coelorinchus mediterraneus   | 3.5 ± 0.5        | MP        | Demersal        |
| unicorn grenadier       | Coelorinchus productus       | 3.5 ± 0.5        | MP        | Demersal        |
| croaker                 | Collichthys niveatus         | 3.4 ± 0.45       | MP        | Demersal        |
| Pacific saury           | Cololabis saira              | 3.7 ± 0.44       | MP        | Pelagic         |
| <b>conger</b>           | <b>Conger conger</b>         | <b>4.3 ± 0.8</b> | <b>TP</b> | <b>Demersal</b> |
| garden eel              | Conger myriaster             | 4 ± 0.68         | MP        | Demersal        |
| argentine conger        | Conger orbignianus           | 3.7 ± 0.59       | MP        | Demersal        |
| whitefish               | Coregonus lavaretus          | 3.1 ± 0.4        | P         | Demersal        |
| dolphinfish; mahi mahi  | Coryphaena hippurus          | 4.4 ± 0          | TP        | Pelagic         |
| Pacific grenadier       | Coryphaenoides acrolepis     | 3.8 ± 0.54       | MP        | Demersal        |
| grenadier               | Coryphaenoides armatus       | 3.6 ± 0.52       | MP        | Benthic         |
| Mediterranean grenadier | Coryphaenoides mediterraneus | 3.4 ± 0.41       | MP        | Benthic         |
| largenose grenadier     | Coryphaenoides nasutus       | 3.6 ± 0.5        | MP        | Demersal        |
| roundnose grenadier     | Coryphaenoides rupestris     | 3.5 ± 0.49       | MP        | Demersal        |
| gold sculpin            | Cottiusculus schmidti        | 3.2 ± 0.4        | P         | Demersal        |
| karanteen seabream      | Crenidens crenidens          | 2.8 ± 0.29       | H         | Demersal        |
| two-spot surgeonfish    | Ctenochaetus binotatus       | 2 ± 0            | H         | Benthic         |
| striated surgeonfish    | Ctenochaetus striatus        | 2 ± 0            | H         | Benthic         |
| lumpfish                | Cyclopterus lumpus           | 3.9 ± 0          | MP        | Pelagic         |
| shiner surfperch        | Cymatogaster aggregata       | 3 ± 0.31         | P         | Demersal        |
| crocodile fish          | Cymbacephalus beauforti      | 4.5 ± 0          | MP        | Demersal        |
| four-lined tonguesole   | Cynoglossus bilineatus       | 3.5 ± 0.37       | MP        | Benthic         |

|                              |                                   |                  |           |                 |
|------------------------------|-----------------------------------|------------------|-----------|-----------------|
| long tongue sole             | <i>Cynoglossus lingua</i>         | 3.5 ± 0.37       | MP        | Benthic         |
| large-scaled tongue sole     | <i>Cynoglossus macrolepidotus</i> | 3.5 ± 0.4        | MP        | Benthic         |
| sole                         | <i>Cynoglossus robustus</i>       | 3.5 ± 0.4        | MP        | Benthic         |
| halfsmooth tonguesole        | <i>Cynoglossus semilaevis</i>     | 3.7 ± 0.6        | MP        | Benthic         |
| four-lined tonguesole        | <i>Cynoglossus sidensis</i>       | 3.5 ± 0.37       | MP        | Benthic         |
| <b>tonguefishes</b>          | <b><i>Cynoglossus spp.</i></b>    | <b>3.5 ± 0.4</b> | <b>MP</b> | <b>Demersal</b> |
| acoupa weakfish              | <i>Cynoscion acoupa</i>           | 4.1 ± 0.7        | MP        | Demersal        |
| sand weakfish                | <i>Cynoscion arenarius</i>        | 4.3 ± 0.8        | MP        | Demersal        |
| stripped weakfish            | <i>Cynoscion guatucupa</i>        | 4.2 ± 0.7        | MP        | Demersal        |
| spotted sea trout            | <i>Cynoscion nebulosus</i>        | 4 ± 0.66         | MP        | Demersal        |
| silver perch                 | <i>Cynoscion nothus</i>           | 4 ± 0.7          | P         | Demersal        |
| weakfish                     | <i>Cynoscion regalis</i>          | 3.8 ± 0.4        | MP        | Demersal        |
| striped weakfish             | <i>Cynoscion striatus</i>         | 3.9 ± 0.6        | MP        | Demersal        |
| green weakfish               | <i>Cynoscion virescens</i>        | 4 ± 0.7          | MP        | Demersal        |
| flying fish                  | <i>Cypselurus heterurus</i>       | 3.4 ± 0.45       | P         | Pelagic         |
| stingray                     | <i>Dasyatis akajei</i>            | 3.8 ± 0.58       | MP        | Benthic         |
| Southern stingray            | <i>Dasyatis americana</i>         | 3.5 ± 0.6        | MP        | Benthic         |
| whiptail stingray            | <i>Dasyatis brevis</i>            | 3.8 ± 0.6        | MP        | Benthic         |
| longtail stingray            | <i>Dasyatis longus</i>            | 3.5 ± 0.37       | MP        | Benthic         |
| Atlantic stingray            | <i>Dasyatis sabina</i>            | 3.5 ± 0.42       | MP        | Benthic         |
| bluntnose stingray           | <i>Dasyatis say</i>               | 3.5 ± 0.6        | MP        | Benthic         |
| pale-edged stingray          | <i>Dasyatis zugei</i>             | 3.5 ± 0.57       | MP        | Benthic         |
| spinyhead sculpin            | <i>Dasycottus setiger</i>         | 3.5 ± 0.5        | MP        | Demersal        |
| sting ray                    | <i>Dasytis sabina</i>             | 3.5 ± 0.42       | MP        | Demersal        |
| scorpion fish                | <i>Deania calcea</i>              | 4.2 ± 0.7        | TP        | Demersal        |
| mackerel scad                | <i>Decapterus macarellus</i>      | 4 ± 0.2          | MP        | Pelagic         |
| blue scad                    | <i>Decapterus maruadsi</i>        | 3.4 ± 0.45       | MP        | Pelagic         |
| Indian scad                  | <i>Decapterus russelli</i>        | 3.7 ± 0.6        | MP        | Demersal        |
| goatee croaker               | <i>Dendrophysa russelii</i>       | 3.5 ± 0.5        | MP        | Demersal        |
| yellowback; crimson seabream | <i>Dentex tumifrons</i>           | 3.8 ± 0.56       | MP        | Demersal        |
| painted sweetlips            | <i>Diagramma pictum</i>           | 3.7 ± 0.2        | MP        | Benthic         |
| lantern fish                 | <i>Diaphus chrysorhynchus</i>     | 3.1 ± 0.3        | P         | Benthic         |
| lantern fish                 | <i>Diaphus suborbitalis</i>       | 3.1 ± 0.3        | P         | Pelagic         |
| California headlightfish     | <i>Diaphus theta</i>              | 3.1 ± 0.25       | P         | Demersal        |
| lantern fish                 | <i>Diaphus watasei</i>            | 3.2 ± 0.3        | P         | Benthic         |
| Irish mojarra                | <i>Diapterus auratus</i>          | 2.4 ± 0.9        | H         | Benthic         |
| Peruvian mojarra             | <i>Diapterus peruvianus</i>       | 3.7 ± 0.2        | MP        | Benthic         |
| striped mojarra              | <i>Diapterus plumieri</i>         | 2.2 ± 0          | H         | Benthic         |
| sea bass                     | <i>Dicentrarchus labrax</i>       | 3.8 ± 0.6        | MP        | Demersal        |
| sand perch                   | <i>Diplectrum formosum</i>        | 4.5 ± 0.8        | MP        | Demersal        |
| annular seabream             | <i>Diplodus annualis</i>          | 3.4 ± 0.4        | MP        | Benthic         |
| sharpsnout seabream          | <i>Diplodus puntazzo</i>          | 2.9 ± 0.4        | H         | Benthic         |
| white seabream               | <i>Diplodus sargus</i>            | 3 ± 0.3          | P         | Demersal        |
| common two-banded seabream   | <i>Diplodus vulgaris</i>          | 3.2 ± 0.4        | P         | Demersal        |
| Patagonian toothfish         | <i>Dissostichus eleginoides</i>   | 4 ± 0.68         | TP        | Demersal        |
| blackthroat seaperch         | <i>Doederleinia berycoides</i>    | 3.9 ± 0.56       | MP        | Demersal        |
| rainbow runner               | <i>Elagatis bipinnulata</i>       | 4.3 ± 0          | MP        | Demersal        |
| navaga                       | <i>Eleginus navaga</i>            | 4.2 ± 0.73       | TP        | Demersal        |

|                          |                               |                  |           |                 |
|--------------------------|-------------------------------|------------------|-----------|-----------------|
| fourfinger threadfin     | Eleutheronema tetradactylum   | 4.4 ± 0.8        | TP        | Demersal        |
| Pacific layfish          | Elops affinis                 | 4.1 ± 0.7        | MP        | Demersal        |
| mullet                   | Elops saurus                  | 4 ± 0.7          | MP        | Demersal        |
| anchovy                  | Engraulis encrasicolus        | 3.1 ± 0.45       | P         | Pelagic         |
| Japanese anchovy         | Engraulis japonica            | 3.1 ± 0.1        | P         | Pelagic         |
| northern anchovy         | Engraulis mordax              | 3 ± 0.3          | P         | Pelagic         |
| oblique-jaw thryssa      | Engraulis purava              | 3.5 ± 0.5        | MP        | Pelagic         |
| orbfish                  | Ephippus orbis                | 4 ± 0.61         | TP        | Benthic         |
| sling-jaw wrasse         | Epibulus insidiator           | 3.8 ± 0.7        | MP        | Benthic         |
| areolate grouper         | Epinephelus areolatus         | 3.6 ± 0.6        | MP        | Demersal        |
| chocolate hind           | Epinephelus boenack           | 4.2 ± 0.7        | TP        | Demersal        |
| whitespotted grouper     | Epinephelus coeruleopunctatus | 3.7 ± 0.5        | MP        | Demersal        |
| banded grouper           | Epinephelus coioides          | 3.9 ± 0.7        | MP        | Demersal        |
| graysby                  | Epinephelus cruentatus        | 4.3 ± 0.6        | TP        | Demersal        |
| speckled hind            | Epinephelus drummondhayi      | 4 ± 0.6          | MP        | Demersal        |
| banded reef cod          | Epinephelus fasciatus         | 3.7 ± 0.6        | MP        | Demersal        |
| yellowedge grouper       | Epinephelus flavolimbatus     | 3.8 ± 0.61       | MP        | Benthic         |
| red hind                 | Epinephelus guttatus          | 3.8 ± 0.3        | MP        | Demersal        |
| Atlantic goliath grouper | Epinephelus itajara           | 4.1 ± 0          | TP        | Demersal        |
| highfin grouper          | Epinephelus maculatus         | 3.9 ± 0.7        | MP        | Demersal        |
| dusky grouper            | Epinephelus marginatus        | 3.7 ± 0.6        | MP        | Demersal        |
| honeycomb grouper        | Epinephelus merra             | 3.8 ± 0.6        | MP        | Demersal        |
| red grouper              | Epinephelus morio             | 3.5 ± 0.5        | MP        | Demersal        |
| snowy grouper            | Epinephelus niveatus          | 4 ± 0.58         | MP        | Demersal        |
| sixbar grouper           | Epinephelus sexfasciatus      | 3.8 ± 0.6        | MP        | Demersal        |
| jack-knifefish           | Equetus lanceolatus           | 3.4 ± 0.5        | P         | Demersal        |
| splendid ponyfish        | Equula splendens              | 2.9 ± 0.38       | H         | Benthic         |
| bird sculpin             | Ereunias grallator            | 3.6 ± 0.6        | MP        | Demersal        |
| deep water red snapper   | Etelis oculatus               | 4.2 ± 0.57       | MP        | Demersal        |
| bonga shad               | Ethmalosa fimbriata           | 2.5 ± 0          | H         | Pelagic         |
| blackbelly lanternshark  | Etmopterus lucifer            | 4.2 ± 0.5        | MP        | Pelagic         |
| chromide                 | Etroplus suratensis           | 2.5 ± 0.5        | H         | Benthic         |
| splendid ponyfish        | Eubleekeria splendens         | 2.9 ± 0.38       | H         | Benthic         |
| mojarra                  | Eucinostomus gula             | 2.7 ± 0.1        | H         | Benthic         |
| kawakawa                 | Euthynnus affinis             | 4.5 ± 0.8        | TP        | Pelagic         |
| little tunny             | Euthynnus alletteratus        | 4.5 ± 0.8        | TP        | Pelagic         |
| grey gurnard             | Eutrigla gurnardus            | 3.6 ± 0.6        | MP        | Demersal        |
| <b>cornetfishes</b>      | <b>Fistularia spp.</b>        | <b>4.5 ± 0.8</b> | <b>TP</b> | <b>Demersal</b> |
| mummichog                | Fundulus heteroclitus         | 3.6 ± 0.48       | MP        | Demersal        |
| silvery pout             | Gadiculus argenteus           | 3.6 ± 0.3        | P         | Benthic         |
| Pacific cod              | Gadus macrocephalus           | 4 ± 0.7          | MP        | Benthic         |
| whiting                  | Gadus merlangus               | 3.6 ± 0.4        | MP        | Demersal        |
| cod                      | Gadus morhua                  | 4.4 ± 0.8        | TP        | Demersal        |
| white sea cod            | Gadus morhua marisalbi        | 3.6 ± 0.6        | MP        | Demersal        |
| greenland cod            | Gadus ogac                    | 3.6 ± 0.6        | MP        | Demersal        |
| blue whiting             | Gadus poutassou               | 4 ± 0.7          | MP        | Demersal        |
| <b>cods</b>              | <b>Gadus spp.</b>             | <b>3.6 ± 0.4</b> | <b>MP</b> | <b>Demersal</b> |
| catfish                  | Galeichthys felis             | 3.3 ± 0.6        | P         | Benthic         |

|                          |                              |                   |           |                 |
|--------------------------|------------------------------|-------------------|-----------|-----------------|
| tiger shark              | Galeocerdo cuvier            | 4.5 ± 0.7         | TP        | Pelagic         |
| three-spined stickleback | Gasterosteus aculeatus       | 3.5 ± 0.5         | MP        | Benthic         |
| Guri sea catfish         | Genidens genidens            | 3.5 ± 0.4         | MP        | Demersal        |
| white croaker            | Genyonemus lineatus          | 3.4 ± 0.49        | MP        | Benthic         |
| kingclip                 | Genypterus capensis          | 4.4 ± 0.61        | TP        | Demersal        |
| common silverbiddy       | Gerres argyreus              | 3.1 ± 0.2         | P         | Benthic         |
| whipfin mojarra          | Gerres filamentosus          | 3.3 ± 0.4         | P         | Benthic         |
| parore                   | Girella tricuspidata         | 2 ± 0             | H         | Benthic         |
| argentines               | Glossanodon semifasciatus    | 3.1 ± 0.34        | P         | Benthic         |
| witch                    | Glyptocephalus cynoglossus   | 3.1 ± 0.3         | MP        | Benthic         |
| Japanese cusk            | Glyptophidium japonicum      | 3.5 ± 0.6         | MP        | Benthic         |
| black goby               | Gobius niger                 | 3.2 ± 0.4         | MP        | Benthic         |
| <b>gobies</b>            | <b>Gobius spp.</b>           | <b>3.3 ± 0.39</b> | <b>MP</b> | <b>Demersal</b> |
| morwongs                 | Goniistius quadricornis      | 2.7 ± 0.25        | H         | Benthic         |
| ploughfish               | Gymnodraco acuticeps         | 4.5 ± 0.8         | TP        | Demersal        |
| Nichol's lanternfish     | Gymnoscopelus nicholsi       | 3.4 ± 0.5         | P         | Pelagic         |
| giant moray              | Gymnothorax javanicus        | 3.9 ± 0.64        | TP        | Demersal        |
| kidako moray eels        | Gymnothorax kidako           | 4.5 ± 0.61        | TP        | Demersal        |
| California butterfly ray | Gymnura marmorata            | 4 ± 0.65          | MP        | Benthic         |
| smooth butterfly ray     | Gymnura micrura              | 3.6 ± 0.53        | MP        | Demersal        |
| white margate            | Haemulon album               | 3.3 ± 0.1         | MP        | Benthic         |
| caesar grunt             | Haemulon carbonarium         | 3.3 ± 0.5         | MP        | Demersal        |
| white grunt              | Haemulon plumieri            | 3.8 ± 0           | MP        | Demersal        |
| bluestriped grunt        | Haemulon sciurus             | 3.5 ± 0.2         | MP        | Demersal        |
| greybar grunt            | Haemulon sexfaciatum         | 4.2 ± 0.73        | MP        | Benthic         |
| yellowstripe grunt       | Haemulopsis axillaris        | 3.4 ± 0.6         | MP        | Demersal        |
| narrowmouthed catshark   | Halaculurus bivius           | 3.8 ± 0.5         | MP        | Demersal        |
| scaled herring           | Harengula jaguana            | 3.4 ± 0           | MP        | Pelagic         |
| bombay duck              | Harpodon nehereus            | 4.2 ± 0.73        | MP        | Demersal        |
| red fish                 | Helicolenus dactylopterus    | 3.8 ± 0.6         | MP        | Demersal        |
| scorpion fishes          | Helicolenus hilgendorfi      | 3.2 ± 0.4         | MP        | Benthic         |
| red Irish lord           | Hemilepidotus hemilepidotus  | 3.5 ± 0.6         | MP        | Benthic         |
| garfish                  | Hemiramphus robustus         | 3.3 ± 0.4         | MP        | Pelagic         |
| cow sharks               | Heptranchias perlo           | 4.2 ± 0.6         | TP        | Demersal        |
| rock greenling           | Hexagrammos lagocephalus     | 3.9 ± 0.5         | MP        | Demersal        |
| sixgill shark            | Hexanchus griseus            | 4.5 ± 0.2         | TP        | Demersal        |
| honeycomb stingray       | Himantura uarnak             | 3.6 ± 0.6         | MP        | Demersal        |
| flathead flounder        | Hippoglossoides dubius       | 3.6 ± 0.6         | MP        | Demersal        |
| flathead sole            | Hippoglossoides elassodon    | 3.6 ± 0.6         | MP        | Benthic         |
| American plaice          | Hippoglossoides platessoides | 3.7 ± 0.5         | MP        | Benthic         |
| <b>halibuts</b>          | <b>Hippoglossus spp.</b>     | <b>4.3 ± 0.65</b> | <b>MP</b> | <b>Benthic</b>  |
| Pacific halibut          | Hippoglossus stenolepis      | 4.1 ± 0.2         | MP        | Demersal        |
| <b>squirrelfishes</b>    | <b>Holocentrus spp.</b>      | <b>3.5 ± 0.6</b>  | <b>MP</b> | <b>Benthic</b>  |
| cusk eel                 | Hoplobrotula armata          | 4 ± 0.66          | MP        | Benthic         |
| orange roughy            | Hoplostethus atlanticus      | 4.3 ± 0.1         | TP        | Demersal        |
| beluga                   | Huso huso                    | 4.1 ± 0.97        | MP        | Pelagic         |
| ratfish                  | Hydrolagus barbouri          | 3.5 ± 0.37        | MP        | Demersal        |
| greater sand eel         | Hyperoplus lanceolatus       | 4.2 ± 0.7         | MP        | Demersal        |

|                             |                                   |              |           |                 |
|-----------------------------|-----------------------------------|--------------|-----------|-----------------|
| walleye                     | <i>Hyperprosopob argenteum</i>    | 3.5 ± 0.5    | MP        | Demersal        |
| shiner surf perch           | <i>Hyperprosopon ellipticum</i>   | 3.4 ± 0.5    | MP        | Demersal        |
| snowy grouper               | <i>Hyporthodus niveatus</i>       | 4 ± 0.58     | MP        | Demersal        |
| rainbow surf perch          | <i>Hypsurus caryi</i>             | 3.3 ± 0.5    | MP        | Demersal        |
| cheekspot goby              | <i>Ilypnus gilberti</i>           | 3.2 ± 0.4    | MP        | Demersal        |
| Japanese flathead           | <i>Inegocia japonica</i>          | 3.7 ± 0.6    | MP        | Demersal        |
| Indo-Pacific sailfish       | <i>Istiophorus platypterus</i>    | 4.5 ± 0.3    | TP        | Pelagic         |
| mako shark; shortfin mako   | <i>Isurus oxyrinchus</i>          | 4.5 ± 0      | TP        | Pelagic         |
| bigeye croaker              | <i>Johnius aneus</i>              | 4 ± 0.69     | TP        | Benthic         |
| Belanger's croaker          | <i>Johnius belangerii</i>         | 3.3 ± 0.23   | P         | Benthic         |
| karut croaker               | <i>Johnius carutta</i>            | 4 ± 0.61     | TP        | Demersal        |
| sin croaker                 | <i>Johnius dussumieri</i>         | 4.1 ± 0.7    | TP        | Demersal        |
| sin croaker                 | <i>Johnius sina</i>               | 4.1 ± 0.7    | TP        | Demersal        |
| soldier croaker             | <i>Johnius soldado</i>            | 4 ± 0.61     | TP        | Demersal        |
| stone flounder              | <i>Kareius bicoloratus</i>        | 3.7 ± 0.6    | MP        | Demersal        |
| skipjack tuna               | <i>Katsuwonus pelamis</i>         | 3.8 ± 0.6    | TP        | Pelagic         |
| gizzard shad                | <i>Konosirus punctatus</i>        | 2.9 ± 0.22   | H         | Benthic         |
| spiny flathead              | <i>Kumococius rodericensis</i>    | 3.8 ± 0.6    | MP        | Demersal        |
| bermuda sea chub            | <i>Kyphosus sectatrix</i>         | 2 ± 0        | H         | Benthic         |
| brassy chub                 | <i>Kyphosus vaigiensis</i>        | 2 ± 0        | H         | Benthic         |
| hogfish                     | <i>Lachnolaimus maximus</i>       | 4.2 ± 0      | MP        | Demersal        |
| longfin codling             | <i>Laemonema longipes</i>         | 3.6 ± 0.4    | MP        | Demersal        |
| pinfish                     | <i>Lagodon rhomboides</i>         | 4.4 ± 0      | MP        | Demersal        |
| brokenline laternfish       | <i>Lampanyctus jordani</i>        | 3.3 ± 0.4    | MP        | Pelagic         |
| pinpoint lampfish           | <i>Lampanyctus regalis</i>        | 3.2 ± 0.4    | P         | Pelagic         |
| lamprey                     | <i>Lampetra fluviatilis</i>       | 4.5 ± 0.8    | TP        | Demersal        |
| opah                        | <i>Lampris guttatus</i>           | 4.2 ± 0.62   | TP        | Pelagic         |
| opah                        | <i>Lamprius regius</i>            | 4.2 ± 0.62   | TP        | Pelagic         |
| deepsea fish                | <i>Lamprogrammus niger</i>        | 3.7 ± 0.6    | MP        | Pelagic         |
| yellow croakers             | <i>Larimichthys crocea</i>        | 3.7 ± 0.56   | MP        | Demersal        |
| sea perch; Japanese seabass | <i>Lateolabrax japonicus</i>      | 3.4 ± 0.43   | MP        | Demersal        |
| striped trumpeter           | <i>Latris lineata</i>             | 3.8 ± 0.6    | MP        | Pelagic         |
| common ponyfish             | <i>Leiognathus equulus</i>        | 3 ± 0.4      | P         | Demersal        |
| long-finned slipmouth       | <i>Leiognathus fasciatus</i>      | 3.3 ± 0.45   | MP        | Demersal        |
| spot                        | <i>Leiostomus xanthurus</i>       | 3.9 ± 0.4    | P         | Benthic         |
| Mediterranean codling       | <i>Lepidion lepidion</i>          | 3.6 ± 0.6    | MP        | Benthic         |
| escolar                     | <i>Lepidocybium flavobrunneum</i> | 4.3 ± 0.67   | TP        | Pelagic         |
| bay goby                    | <i>Lepidogobius lepidus</i>       | 3.3 ± 0.4    | MP        | Demersal        |
| rock sole                   | <i>Lepidopsetta bilineata</i>     | 3.2 ± 0.4    | MP        | Benthic         |
| Northern rock sole          | <i>Lepidopsetta polyxystra</i>    | 3.3 ± 0.5    | MP        | Demersal        |
| scabberfish                 | <i>Lepidopus caudatus</i>         | 3.9 ± 0.7    | MP        | Demersal        |
| fourspot megrim             | <i>Lepidorhombus boscii</i>       | 3.7 ± 0.6    | MP        | Benthic         |
| megrim                      | <i>Lepidorhombus whiffiagonis</i> | 4.2 ± 0.8    | TP        | Demersal        |
| large-scaled gurnard        | <i>Lepidotrigla cavillone</i>     | 3.2 ± 0.4    | MP        | Demersal        |
| redbanded searobin          | <i>Lepidotrigla guentheri</i>     | 3.5 ± 0.5    | MP        | Demersal        |
| <b>gurnards</b>             | <b><i>Lepidotrigla spp.</i></b>   | <b>3.4 ±</b> | <b>MP</b> | <b>Demersal</b> |
| Pacific staghorn sculpin    | <i>Leptocottus armatus</i>        | 3.7 ± 0.64   | MP        | Benthic         |
| Savalai hairtail            | <i>Lepturacanthus savala</i>      | 4.3 ± 0.76   | TP        | Pelagic         |

|                            |                                      |                  |           |                 |
|----------------------------|--------------------------------------|------------------|-----------|-----------------|
| Pacific yellowtail emperor | <i>Lethrinus atkinsoni</i>           | 3.5 ± 0.5        | MP        | Demersal        |
| grass emperor              | <i>Lethrinus laticaudis</i>          | 4.5 ± 0.8        | MP        | Demersal        |
| spangled emperor           | <i>Lethrinus nebulosus</i>           | 3.3 ± 0.4        | MP        | Demersal        |
| spotcheek emperor          | <i>Lethrinus rubrioperculatus</i>    | 3.6 ± 0.6        | MP        | Demersal        |
| sandy ray                  | <i>Leucoraja circularis</i>          | 3.5 ± 0.37       | MP        | Benthic         |
| cuckoo ray                 | <i>Leucoraja naevus</i>              | 3.9 ± 0.6        | MP        | Benthic         |
| dab                        | <i>Limanda limanda</i>               | 3.3 ± 0.4        | MP        | Demersal        |
| marbled sole               | <i>Limanda yokohamae</i>             | 3.5 ± 0.5        | MP        | Benthic         |
| slender scorpionfish       | <i>Lioscorpius longiceps</i>         | 3.2 ± 0.4        | MP        | Demersal        |
| sand steenbras             | <i>Lithognathus mormyrus</i>         | 3.4 ± 0.5        | MP        | Benthic         |
| <b>mullet</b>              | <b><i>Liza abua</i></b>              | <b>2 ±</b>       | <b>H</b>  | <b>Benthic</b>  |
| golden grey mullet         | <i>Liza aurata</i>                   | 2.5 ± 0.2        | H         | Benthic         |
| <b>mullet</b>              | <b><i>Liza dussumieri</i></b>        | <b>2.7 ± 0.3</b> | <b>H</b>  | <b>Benthic</b>  |
| redeye mullet              | <i>Liza haematocheila</i>            | 2.5 ± 0.19       | H         | Benthic         |
| thicklip grey mullet       | <i>Liza ramada</i>                   | 2.6 ± 0.32       | H         | Benthic         |
| <b>Indian shad</b>         | <b><i>Ilisha indica</i></b>          | <b>2 ± 0.1</b>   | <b>H</b>  | <b>Benthic</b>  |
| tripletail                 | <i>Lobotes surinamensis</i>          | 4 ± 0.5          | TP        | Demersal        |
| goosefish                  | <i>Lophius americanus</i>            | 4.5 ± 0.6        | TP        | Demersal        |
| blackbellied angler        | <i>Lophius budegassa</i>             | 4.5 ± 0.8        | TP        | Demersal        |
| blackfin goosefish         | <i>Lophius gastrphysus</i>           | 4.5 ± 0.6        | TP        | Demersal        |
| sole                       | <i>Lophius piscatorius</i>           | 4.5 ± 0.8        | TP        | Demersal        |
|                            | <b><i>Lophius spp.</i></b>           | <b>4.5 ± 0.6</b> | <b>TP</b> | <b>Demersal</b> |
| tilefish                   | <i>Lopholatilus chamaeleonticeps</i> | 3.5 ± 0.4        | MP        | Demersal        |
| rainwater killifish        | <i>Lucania parva</i>                 | 3.1 ± 0.4        | P         | Benthic         |
| longsnout prickleback      | <i>Lumpenella longirostris</i>       | 3.1 ± 0.3        | MP        | Demersal        |
| mutton snapper             | <i>Lutjanus analis</i>               | 3.9 ± 0.6        | MP        | Demersal        |
| mangrove red snapper       | <i>Lutjanus argentimaculatus</i>     | 4.5 ± 0.8        | MP        | Demersal        |
| twospot red snapper        | <i>Lutjanus bohar</i>                | 4.1 ± 0.7        | TP        | Demersal        |
| blackfin snapper           | <i>Lutjanus buccanella</i>           | 3.9 ± 0.57       | MP        | Demersal        |
| Northern red snapper       | <i>Lutjanus campechanus</i>          | 4 ± 0.59         | TP        | Demersal        |
| Colorado snapper           | <i>Lutjanus colorado</i>             | 3.1 ± 0          | MP        | Demersal        |
| checkered snapper          | <i>Lutjanus decussatus</i>           | 4 ± 0.67         | TP        | Pelagic         |
| crimson snapper            | <i>Lutjanus erythropterus</i>        | 4.5 ± 0.8        | MP        | Demersal        |
| grey snapper               | <i>Lutjanus griseus</i>              | 4.3 ± 0.8        | TP        | Demersal        |
| dog snapper                | <i>Lutjanus jocu</i>                 | 4.4 ± 0.3        | TP        | Demersal        |
| John's snapper             | <i>Lutjanus johnii</i>               | 4.2 ± 0.7        | TP        | Demersal        |
| common bluestripe snapper  | <i>Lutjanus kasmira</i>              | 3.6 ± 0.6        | MP        | Demersal        |
| mahogany snapper           | <i>Lutjanus mahogoni</i>             | 4.3 ± 0.4        | MP        | Demersal        |
| malabar red snapper        | <i>Lutjanus malabaricus</i>          | 4.5 ± 0.8        | TP        | Demersal        |
| onespot snapper            | <i>Lutjanus monostigma</i>           | 4.3 ± 0.74       | MP        | Demersal        |
| Southern red snapper       | <i>Lutjanus purpureus</i>            | 3.6 ± 0.6        | MP        | Demersal        |
| moses perch                | <i>Lutjanus russelli</i>             | 4.3 ± 0.8        | TP        | Pelagic         |
| humphead snapper           | <i>Lutjanus sanguineus</i>           | 4.5 ± 0.8        | MP        | Pelagic         |
| <b>snappers</b>            | <b><i>Lutjanus spp.</i></b>          | <b>4.5 ± 0.8</b> | <b>TP</b> | <b>Demersal</b> |
| lane snapper               | <i>Lutjanus synagris</i>             | 3.8 ± 0.6        | MP        | Demersal        |
| brownstripe red snapper    | <i>Lutjanus vitta</i>                | 4.1 ± 0.7        | TP        | Demersal        |
| eelpout                    | <i>Lycodes hubbsi</i>                | 3.5 ± 0.5        | MP        | Demersal        |
| king weakfish              | <i>Macrodon ancylodon</i>            | 3.9 ± 0.65       | MP        | Demersal        |



|                          |                          |                  |           |                 |
|--------------------------|--------------------------|------------------|-----------|-----------------|
| longnose snipe fish      | Macroramphosus scolopax  | 3.5 ± 0.4        | MP        | Demersal        |
| roughhead grenadier      | Macrourus berglax        | 4.5 ± 0.8        | MP        | Benthic         |
| blotched picarel         | Maena maena              | 4.2 ± 0.7        | TP        | Demersal        |
| <b>picarels</b>          | <b>Maena spp.</b>        | <b>4.2 ± 0.7</b> | <b>TP</b> | <b>Demersal</b> |
| blue marlin              | Makaira nigricans        | 4.5 ± 0.3        | TP        | Pelagic         |
| darkfin sculpin          | Malacocottus zonurus     | 3.2 ± 0.4        | MP        | Demersal        |
| splendid seabass         | Malakichthys elegans     | 3.7 ± 0.5        | MP        | Demersal        |
| lantern bellies          | Malakichthys griseus     | 3.2 ± 0.4        | P         | Pelagic         |
| silverbelly seaperch     | Malakichthys wakiyae     | 4 ± 0.66         | MP        | Pelagic         |
| capelin                  | Mallotus villosus        | 3.2 ± 0.3        | P         | Demersal        |
| torpedo scad             | Megalapsis cordyla       | 4.4 ± 0.8        | TP        | Pelagic         |
| tarpon                   | Megalops atlanticus      | 4.5 ± 0          | TP        | Pelagic         |
| haddock                  | Melanogrammus aeglefinus | 4.1 ± 0.7        | MP        | Benthic         |
| silverside               | Menidia audens           | 3.1 ± 0.03       | P         | Demersal        |
| Atlantic silversides     | Menidia menidia          | 3.2 ± 0.3        | P         | Pelagic         |
| Southern kingcroaker     | Menticirrhus americanus  | 3.5 ± 0          | MP        | Demersal        |
| Gulf kingcroaker         | Menticirrhus littoralis  | 3.9 ± 0.6        | MP        | Benthic         |
| Northern kingfish        | Menticirrhus saxatilis   | 3.6 ± 0.5        | MP        | Benthic         |
| kingfish                 | Menticirrhus undulatus   | 3.3 ± 0.5        | MP        | Demersal        |
| whiting                  | Merlangius merlangus     | 4.4 ± 0.8        | MP        | Demersal        |
| silver hake              | Merluccius bilinearis    | 4.3 ± 0.7        | MP        | Demersal        |
| hake                     | Merluccius capensis      | 4.5 ± 0.8        | TP        | Demersal        |
| Aargentine hake          | Merluccius hubbsi        | 4.2 ± 0.67       | TP        | Pelagic         |
| European hake            | Merluccius merluccius    | 4.4 ± 0.8        | MP        | Demersal        |
| Pacific hake             | Merluccius productus     | 4.4 ± 0.8        | MP        | Demersal        |
| halfmoon                 | Microcanthus strigatus   | 3 ± 0.35         | P         | Demersal        |
| blue whiting             | Micromesistius poutassou | 4 ± 0.7          | MP        | Demersal        |
| whitemouth croaker       | Micropogonias furnieri   | 3.3 ± 0.5        | MP        | Demersal        |
| croaker                  | Micropogonias undulatus  | 3.3 ± 0.4        | P         | Demersal        |
| lemon sole               | Microstomus kitt         | 3.3 ± 0.4        | MP        | Benthic         |
| dover sole               | Microstomus pacificus    | 3.2 ± 0.1        | MP        | Demersal        |
| ocean sunfish            | Mola mola                | 3.7 ± 0.47       | MP        | Pelagic         |
| ling                     | Molva molva              | 4.2 ± 0.73       | MP        | Demersal        |
| fanbellied leatherjacket | Monacanthus chinensis    | 2.6 ± 0.3        | H         | Benthic         |
| butter bream             | Monodactylus argenteus   | 3 ± 0.33         | P         | Demersal        |
| humpnose bigeye bream    | Monotaxis grandoculis    | 3.4 ± 0          | MP        | Benthic         |
| common mora              | Mora moro                | 3.8 ± 0.55       | MP        | Demersal        |
| white perch              | Morone americana         | 3 ± 0.2          | P         | Demersal        |
| striped bass             | Morone saxatilis         | 4.5 ± 0.8        | MP        | Demersal        |
| golden grey mullet       | Mugil auratus            | 2.5 ± 0.2        | H         | Benthic         |
| mullet                   | Mugil cephalus           | 2.1 ± 0.2        | H         | Benthic         |
| white mullet             | Mugil curema             | 2 ± 0            | H         | Benthic         |
| mullet                   | Mugil gyrans             | 2 ± 0            | H         | Benthic         |
| lebranche mullet         | Mugil liza               | 2 ± 0            | H         | Benthic         |
| mullet                   | Mugil platanus           | 2 ± 0            | H         | Benthic         |
| mullet                   | Mugil soiuy              | 2.5 ± 0.19       | H         | Benthic         |
| <b>mullets</b>           | <b>Mugilidae spp.</b>    | <b>2.5 ± 0.5</b> | <b>H</b>  | <b>Benthic</b>  |
| ureogenic goby           | Mugilogobius abei        | 3.2 ± 0.5        | P         | Demersal        |

|                               |                               |                  |           |                 |
|-------------------------------|-------------------------------|------------------|-----------|-----------------|
| red goatfish                  | Mulloidichthys vanicolensis   | 3.6 ± 0.5        | MP        | Benthic         |
| red mullet                    | Mullus barbatus               | 3.2 ± 0.4        | P         | Benthic         |
| <b>mulletts</b>               | <b>Mullus spp.</b>            | <b>3.2 ± 0.4</b> | <b>P</b>  | <b>Benthic</b>  |
| red mullet                    | Mullus surmuletus             | 3.4 ± 0.5        | P         | Benthic         |
| Mediterranean moray           | Muraena helena                | 4.2 ± 61         | TP        | Demersal        |
| <b>morey eels</b>             | <b>Muraena spp.</b>           | <b>3.9 ± 0.6</b> | <b>MP</b> | <b>Demersal</b> |
| daggertooth pike conger       | Muraenesox cinereus           | 4.1 ± 0.66       | TP        | Demersal        |
| dogfish; gummy shark          | Mustelus antarcticus          | 4.5 ± 0.59       | TP        | Demersal        |
| dusky smoothhound             | Mustelus canis                | 3.6 ± 0.2        | MP        | Demersal        |
| dog shark                     | Mustelus griseus              | 3.5 ± 0.6        | MP        | Benthic         |
| brown smoothhound shark       | Mustelus henlei               | 3.6 ± 0.5        | MP        | Benthic         |
| smalleye smoothhound          | Mustelus higmani              | 3.6 ± 0.3        | MP        | Demersal        |
| narrowfin smoothhound         | Mustelus norrisi              | 3.9 ± 0.67       | MP        | Demersal        |
| narrownose smoothhound        | Mustelus schmitti             | 3.6 ± 0.5        | MP        | Demersal        |
| black grouper                 | Mycteroperca bonaci           | 4.3 ± 0.5        | TP        | Demersal        |
| gag                           | Mycteroperca microlepis       | 3.7 ± 0.6        | MP        | Demersal        |
| scamp                         | Mycteroperca phenax           | 4.5 ± 0.8        | TP        | Demersal        |
|                               | <b>Myctophiformes spp.</b>    | <b>3.2 ± 0.4</b> | <b>P</b>  | <b>Pelagic</b>  |
| bright lanternfish            | Myctophum phengodes           | 3.4 ± 0.5        | MP        | Pelagic         |
| eagle ray                     | Myliobatis aquila             | 3.6 ± 0.54       | MP        | Benthic         |
| bat eagle ray                 | Myliobatis californica        | 3.1 ± 0.3        | MP        | Benthic         |
| bullnose eagle ray            | Myliobatis freminvillei       | 3.4 ± 0          | MP        | Benthic         |
| great sculpin                 | Myoxocephalus polyacanthoceph | 4.1 ± 0.7        | MP        | Demersal        |
| sculpin                       | Myoxocephalus quadricornis    | 3.7 ± 0.59       | MP        | Demersal        |
| sculpin                       | Myoxocephalus scorpioides     | 3.4 ± 0.52       | P         | Demersal        |
| shorthorn sculpin             | Myoxocephalus scorpius        | 3.9 ± 0.4        | MP        | Demersal        |
| giant electric ray            | Narcine entemedor             | 3 ± 0.18         | P         | Benthic         |
| whitemargin unicornfish       | Naso annulatus                | 2.1 ± 0.09       | H         | Benthic         |
| bluespine unicornfish         | Naso unicornis                | 2.2 ± 0.11       | H         | Benthic         |
| whitenose shark               | Nasolamia velox               | 4.2 ± 0.74       | TP        | Pelagic         |
| smalleye croaker              | Nebris microps                | 3.6 ± 0.59       | MP        | Demersal        |
| lemon shark                   | Negaprion brevirostris        | 4.3 ± 0.5        | TP        | Demersal        |
| bony bream                    | Nematalosa come               | 2.8 ± 0.28       | H         | Pelagic         |
| roosterfish                   | Nematistius pectoralis        | 4.5 ± 0.8        | TP        | Demersal        |
| Japanese threadfin bream      | Nemipterus japonicus          | 3.8 ± 0.51       | MP        | Demersal        |
| notchedfin threadfin bream    | Nemipterus peronii            | 3.7 ± 0.6        | MP        | Demersal        |
| golden threadfin bream        | Nemipterus virgatus           | 4 ± 0.57         | MP        | Demersal        |
| catfish                       | Neoarius australis            | 3.3 ± 0.6        | MP        | Demersal        |
| cusk eel                      | Neobythites sivicola          | 4 ± 0.66         | MP        | Demersal        |
| round goby                    | Neogobius melanostomus        | 3.2 ± 0.4        | P         | Benthic         |
| white sea catfish             | Netuma barba                  | 3.6 ± 0.4        | MP        | Demersal        |
| giant catfish                 | Netuma thalassina             | 3.1 ± 0.3        | P         | Benthic         |
| white flower croaker          | Nibea albiflora               | 3.5 ± 0.37       | MP        | Demersal        |
| soldier croaker               | Nibea soldado                 | 4 ± 0.61         | TP        | Demersal        |
| <b>croakers</b>               | <b>Nibea spp.</b>             | <b>3.5 ±</b>     | <b>MP</b> | <b>Demersal</b> |
| croaker                       | Nibea spp                     | 4.5 ± 0.7        | MP        | Demersal        |
| spiny eel                     | Notacanthus chemnitzii        | 3.5 ± 0.37       | P         | Benthic         |
| Antarctic yellowbelly rockcod | Notothenia corriceps          | 2.8 ± 0.35       | H         | Benthic         |

|                         |                                     |                  |           |                 |
|-------------------------|-------------------------------------|------------------|-----------|-----------------|
| marbled rockcod         | <i>Notothenia rossii</i>            | 3.6 ± 0.6        | MP        | Demersal        |
| saddled seabream        | <i>Oblada melanura</i>              | 3 ± 0.1          | P         | Benthic         |
| yellowtail snapper      | <i>Ocyurus chrysurus</i>            | 4 ± 0.3          | TP        | Demersal        |
| eelgoby                 | <i>Odontamblyopus rubicundus</i>    | 3.8 ± 0.5        | MP        | Benthic         |
| sand tiger shark        | <i>Odontaspis taurus</i>            | 4.5 ± 0.8        | TP        | Demersal        |
|                         | <i>Odontesthes argentinensis</i>    | 3.3 ± 0.5        | P         | Pelagic         |
| <b>silversides</b>      | <b>Odontesthes spp.</b>             | <b>3.3 ± 0.5</b> | <b>P</b>  | <b>Pelagic</b>  |
| red-toothed triggerfish | <i>Odonus niger</i>                 | 3.2 ± 0.32       | P         | Benthic         |
| castin leatherjacket    | <i>Oligoplites saliens</i>          | 3.8 ± 0.62       | MP        | Pelagic         |
| leatherjacket           | <i>Oligoplites saurus</i>           | 4.3 ± 0.5        | TP        | Demersal        |
| oyster blenny           | <i>Omobranchus anolius</i>          | 2.7 ± 0.2        | H         | Benthic         |
| salmon                  | <i>Oncorhynchus gorboscha</i>       | 4.2 ± 0.7        | MP        | Demersal        |
| chum salmon             | <i>Oncorhynchus keta</i>            | 3.5 ± 0.5        | MP        | Demersal        |
| coho                    | <i>Oncorhynchus kisutch</i>         | 4.2 ± 0.7        | MP        | Demersal        |
| sockeye salmon          | <i>Oncorhynchus nerka</i>           | 3.7 ± 0.4        | MP        | Demersal        |
| chinook salmon          | <i>Oncorhynchus tshawytscha</i>     | 4.4 ± 0.7        | TP        | Demersal        |
| lingcod                 | <i>Ophiodon elongatus</i>           | 4.3 ± 0.72       | TP        | Demersal        |
| Altantic thread herring | <i>Opisthonema oglinum</i>          | 4.5 ± 0          | TP        | Demersal        |
| knifejaws               | <i>Oplegnathus fasciatus</i>        | 3.6 ± 0.5        | MP        | Demersal        |
| Gulf toadfish           | <i>Opsanus beta</i>                 | 3.7 ± 0.6        | MP        | Demersal        |
| pigfish                 | <i>Orthopristis chrysoptera</i>     | 3.4 ± 0          | MP        | Demersal        |
| corocoro gruunt         | <i>Orthopristis ruber</i>           | 3.6 ± 0.2        | MP        | Benthic         |
| tiger-toothed croaker   | <i>Otolithes ruber</i>              | 3.6 ± 0.6        | MP        | Demersal        |
| silvery croaker         | <i>Otolithus argenteus</i>          | 3.6 ± 0.6        | MP        | Demersal        |
| axillary bream          | <i>Pagellus acarne</i>              | 3.5 ± 0.5        | MP        | Benthic         |
| blackspot seabream      | <i>Pagellus bogaraveo</i>           | 3.7 ± 0.56       | MP        | Demersal        |
| common pandora          | <i>Pagellus erythrinus</i>          | 3.4 ± 0.5        | MP        | Benthic         |
| emerald rockcod         | <i>Pagothenia bernacchii</i>        | 3.3 ± 0.4        | MP        | Demersal        |
| striped rockcod         | <i>Pagothenia hansonii</i>          | 3.9 ± 0.6        | MP        | Demersal        |
| snapper                 | <i>Pagrus auratus</i>               | 3.3 ± 0.5        | MP        | Demersal        |
| red seabream            | <i>Pagrus major</i>                 | 3.7 ± 0.49       | MP        | Benthic         |
| red porgy               | <i>Pagrus pagrus</i>                | 3.7 ± 0.6        | MP        | Demersal        |
| silver pomfret          | <i>Pampus argenteus</i>             | 3.1 ± 0.4        | P         | Demersal        |
| chinese silver pomfret  | <i>Pampus chinensis</i>             | 3.6 ± 0.38       | MP        | Pelagic         |
| <b>pomfrets</b>         | <b>Pampus spp.</b>                  | <b>3.1 ± 0.4</b> | <b>P</b>  | <b>Demersal</b> |
| kelp bass               | <i>Paralabrax clathratus</i>        | 3.9 ± 0.6        | MP        | Demersal        |
| spotted sand bass       | <i>Paralabrax maculatofasciatus</i> | 4.2 ± 0.6        | MP        | Demersal        |
| Gulf flounder           | <i>Paralichthys albigutta</i>       | 4.2 ± 0.7        | TP        | Demersal        |
| halibut                 | <i>Paralichthys californicus</i>    | 4.5 ± 0.63       | MP        | Benthic         |
| summer flounder         | <i>Paralichthys dentatus</i>        | 4.5 ± 0.6        | MP        | Benthic         |
| flounder                | <i>Paralichthys lethostigma</i>     | 3.6 ± 0.6        | MP        | Benthic         |
| Japanese flounder       | <i>Paralichthys olivaceus</i>       | 4.4 ± 0.8        | TP        | Demersal        |
|                         | <i>Paralichthys orbignyanus</i>     | 3.5 ± 0.54       | MP        | Demersal        |
| <b>flounders</b>        | <b>Paralichthys spp.</b>            | <b>4.4 ± 0.6</b> | <b>MP</b> | <b>Benthic</b>  |
| speckled flounder       | <i>Paralichthys woolmani</i>        | 4.5 ± 0.8        | TP        | Demersal        |
| creolefish              | <i>Paranthias furcifer</i>          | 3.2 ± 0.1        | P         | Demersal        |
| black pomfret           | <i>Parastromateus niger</i>         | 2.9 ± 0.35       | P         | Benthic         |
| dash-and-dot goatfish   | <i>Parupeneus barberinus</i>        | 3.2 ± 0.4        | P         | Demersal        |

|                         |                               |                  |           |                |
|-------------------------|-------------------------------|------------------|-----------|----------------|
| yellow striped goatfish | Parupeneus chrysopleuron      | 3.5 ± 0.7        | MP        | Benthic        |
| gold-saddle goatfish    | Parupeneus cyclostomus        | 4.2 ± 0.7        | MP        | Demersal       |
| manybar goatfish        | Parupeneus multifasciatus     | 3.5 ± 0.6        | MP        | Demersal       |
| bigeye croaker          | Pennahia anea                 | 4 ± 0.69         | TP        | Benthic        |
| white croaker           | Pennahia argentata            | 3.5 ± 0.43       | MP        | Demersal       |
| American harvestfish    | Peprilus paru                 | 4.5 ± 0          | TP        | Pelagic        |
| perch                   | Perca fluviatilis             | 4.4 ± 0.8        | TP        | Demersal       |
| mudskipper              | Periophtalmodon schlosseri    | 2.5 ± 0.5        | P         | Demersal       |
| armored gurnard         | Peristedion cataphractum      | 3.6 ± 0.4        | MP        | Benthic        |
| oyster blenny           | Petroscirtes anolius          | 2.7 ± 0.2        | H         | Benthic        |
| white surf perch        | Phanerodon furcatus           | 3.4 ± 0.5        | MP        | Demersal       |
| forkbeard               | Phycis blennoides             | 3.7 ± 0.66       | MP        | Demersal       |
| forkbeard               | Phycis phycis                 | 4.3 ± 0.3        | MP        | Demersal       |
| glass eel               | Pisodonophis boro             | 4 ± 0.71         | TP        | Demersal       |
| flounder                | Platichthys flesus            | 3.2 ± 0.4        | MP        | Benthic        |
| sand flathead           | Platycephalus bassensis       | 4.3 ± 0.75       | TP        | Demersal       |
| flathead                | Platycephalus fuscus          | 4.1 ± 0.52       | MP        | Demersal       |
| bartail flathead        | Platycephalus indicus         | 3.6 ± 0.6        | MP        | Demersal       |
| spiny flathead          | Platycephalus rodericensis    | 3.8 ± 0.6        | MP        | Demersal       |
| two-striped sweetlips   | Plectorhinchus albovittatus   | 4 ± 0.66         | MP        | Demersal       |
| harlequin sweetlips     | Plectorhinchus chaetodonoides | 3.8 ± 0.6        | MP        | Demersal       |
| yellowband sweetlip     | Plectorhinchus diagrammus     | 3.4 ± 0.5        | MP        | Benthic        |
| lemon sweetlips         | Plectorhinchus flavomaculatus | 4 ± 0.66         | MP        | Demersal       |
| blackall                | Plectorhinchus pictus         | 3.5 ± 0.5        | MP        | Demersal       |
| sweetlips               | Plectorhynchus cinctus        | 3.5 ± 0.49       | MP        | Demersal       |
| leopard coral grouper   | Plectropomus leopardus        | 4.7 ± 0.7        | TP        | Demersal       |
| silverfish              | Pleuragramma antarcticum      | 3 ± 0            | P         | Pelagic        |
| Atka mackerel           | Pleurogrammus monopterygius   | 3.3 ± 0.4        | MP        | Demersal       |
| plaice                  | Pleuronectes platessa         | 3.3 ± 0.4        | MP        | Benthic        |
| english sole            | Pleuronectes vetulus          | 3.4 ± 0.46       | MP        | Demersal       |
| <b>flounders</b>        | <b>Pleuronichthys spp.</b>    | <b>3.3 ± 0.4</b> | <b>MP</b> | <b>Benthic</b> |
| striped eel catfish     | Plotosus anguillaris          | 3.5 ± 0.6        | MP        | Benthic        |
| striped eel catfish     | Plotosus lineatus             | 3.5 ± 0.6        | MP        | Benthic        |
| drum                    | Pogonias cromis               | 3.9 ± 0.62       | MP        | Demersal       |
| black pollock           | Pollachius pollachius         | 4.3 ± 0.3        | TP        | Demersal       |
| saithe                  | Pollachius virens             | 4.4 ± 0.8        | MP        | Demersal       |
| six-threads threadfin   | Polydactylus sextarius        | 3.8 ± 0.57       | MP        | Benthic        |
| dragon fishes           | Polyipnus spinifer            | 3.3 ± 0.4        | MP        | Demersal       |
| paradise threadfin      | Polynemus paradiseus          | 3.9 ± 0.6        | MP        | Demersal       |
| wreckfish               | Polyprion americanus          | 4.1 ± 0.64       | TP        | Demersal       |
| Hapuku wreckfish        | Polyprion oxygeneios          | 4.5 ± 0.77       | TP        | Pelagic        |
| silver grunt            | Pomadasys argenteus           | 3.4 ± 0.5        | MP        | Demersal       |
| sand grunt              | Pomadasys branickii           | 3.4 ± 0.5        | MP        | Demersal       |
| silver grunt            | Pomadasys hasta               | 3.4 ± 0.5        | MP        | Demersal       |
| raucous grunt           | Pomadasys leuciscus           | 3.2 ± 0.46       | MP        | Demersal       |
| bluefish; tailor        | Pomatomus saltator; saltatrix | 4.5 ± 0.6        | TP        | Demersal       |
| common goby             | Pomatoschistus microps        | 3.3 ± 0.4        | P         | Demersal       |
| sand goby               | Pomatoschistus minutus        | 3.2 ± 0.4        | P         | Demersal       |

|                          |                               |                  |           |                 |
|--------------------------|-------------------------------|------------------|-----------|-----------------|
| Atlantic bigeye          | Priacanthus arenatus          | 4 ± 0            | MP        | Demersal        |
| moontail bullseye        | Priacanthus hamrur            | 3.6 ± 0.5        | MP        | Demersal        |
| blue shark               | Prionace glauca               | 4.2 ± 0.7        | TP        | Pelagic         |
| sharp-tooth snapper      | Pristimoides typus            | 4.2 ± 0.61       | TP        | Benthic         |
| smalltooth sawfish       | Pristis pectinata             | 4.5 ± 0.8        | TP        | Demersal        |
| pompano                  | Psenopsis anomala             | 4 ± 0.3          | MP        | Demersal        |
| turbot                   | Psetta maxima                 | 4 ± 0.63         | MP        | Benthic         |
| Indian halibut           | Psettodes erumei              | 4.4 ± 0.8        | TP        | Demersal        |
| gwelly; white trevally   | Pseudocaranx dentex           | 3.9 ± 0.6        | MP        | Benthic         |
| winter flounder          | Pseudopleuronectes americanus | 2.8 ± 0.4        | MP        | Benthic         |
| marbled sole             | Pseudopleuronectes yokohamae  | 3.5 ± 0.5        | MP        | Demersal        |
| Japanese flounder        | Pseudorhombus javanicus       | 3.5 ± 0.37       | MP        | Benthic         |
| flounder                 | Pseudorhombus jenynsii        | 3.5 ± 0.37       | MP        | Benthic         |
| Malayan flounder         | Pseudorhombus malayanus       | 3.5 ± 0.37       | MP        | Benthic         |
| large yellow croaker     | Pseudosciaena crocea          | 3.7 ± 0.56       | MP        | Demersal        |
| small yellow croaker     | Pseudosciaena polyactis       | 3.6 ± 0.63       | MP        | Demersal        |
| Japanese gissu           | Pterothrissus gissu           | 3.3 ± 0.5        | MP        | Demersal        |
| cobia                    | Rachycentron canadum          | 4 ± 0            | TP        | Pelagic         |
| cobia                    | Rachycentron canadus          | 4 ± 0.6          | TP        | Demersal        |
| starry ray               | Raja asterias                 | 3.5 ± 0.37       | MP        | Benthic         |
| thornback ray            | Raja clavata                  | 3.8 ± 0.2        | MP        | Demersal        |
| shagreen ray             | Raja fullonica                | 3.5 ± 0.37       | MP        | Benthic         |
| round ray                | Raja fyllae                   | 3.3 ± 0.5        | MP        | Benthic         |
| skate                    | Raja kenoujei                 | 4.1 ± 0.74       | TP        | Benthic         |
| skates                   | Raja kwangtungensis           | 3.8 ± 0.6        | MP        | Demersal        |
| winter skate             | Raja miraletus                | 3.8 ± 0.74       | MP        | Benthic         |
| long nose skate          | Raja oxyrhynchus              | 3.5 ± 0.37       | MP        | Benthic         |
| starry ray               | Raja radiata                  | 4.2 ± 0.3        | TP        | Benthic         |
| <b>rays; skates</b>      | <b>Raja spp.</b>              | <b>3.8 ± 0</b>   | <b>MP</b> | <b>Benthic</b>  |
| skate                    | Raja texana                   | 3.8 ± 0.58       | MP        | Benthic         |
| short mackerel           | Rastrelliger brachysoma       | 2.7 ± 0.31       | H         | Benthic         |
| Indian mackerel          | Rastrelliger kanagurta        | 3.2 ± 0.38       | MP        | Pelagic         |
| short mackerel           | Rastrelliger neglectus        | 2.7 ± 0.31       | H         | Benthic         |
| halibut                  | Reinhardtius hippoglossoides  | 4.5 ± 0.8        | TP        | Demersal        |
| speckled guitarfish      | Rhinobatos glaucostigma       | 3.5 ± 0.6        | MP        | Benthic         |
| shovelnose guitarfish    | Rhinobatos productus          | 3.6 ± 0.6        | MP        | Benthic         |
| cownose ray              | Rhinoptera bonasus            | 3.2 ± 0          | MP        | Benthic         |
| Pacific cownose ray      | Rhinoptera steindachnerii     | 3.6 ± 0.5        | MP        | Benthic         |
| Pacific sharpnose shark  | Rhizoprionodon longurio       | 4.2 ± 0.7        | TP        | Demersal        |
| Atlantic sharpnose shark | Rhizoprionodon terraenovae    | 4.3 ± 0.8        | TP        | Pelagic         |
| vermillion snapper       | Rhomboplites aurorubens       | 4.3 ± 0.6        | TP        | Demersal        |
| striped bass             | Roccus saxatilis              | 4.5 ± 0.8        | MP        | Demersal        |
| spotfin croaker          | Roncador stearasii            | 3.3 ± 0.44       | MP        | Benthic         |
| <b>slickhead fishes</b>  | <b>Rouleina spp.</b>          | <b>3.3 ± 0.4</b> | <b>MP</b> | <b>Benthic</b>  |
| Norwegian salmon         | Salmo salar                   | 4.4 ± 0.1        | MP        | Demersal        |
| <b>salmons</b>           | <b>Salmo spp.</b>             | <b>4 ± 0</b>     | <b>MP</b> | <b>Demersal</b> |
| sea trout                | Salmo trutta                  | 3.2 ± 0.4        | MP        | Demersal        |
| Arctic char              | Salvelinus alpinus            | 4.3 ± 0.8        | MP        | Demersal        |

|                                  |                             |                  |           |                 |
|----------------------------------|-----------------------------|------------------|-----------|-----------------|
| dolly varden                     | Salvelinus malma            | 4.2 ± 0.7        | MP        | Demersal        |
| Atlantic bonito                  | Sarda sarda                 | 4.5 ± 0.7        | TP        | Pelagic         |
| sardine; European pilchard       | Sardina pilchardus          | 3.1 ± 0.2        | P         | Pelagic         |
| anchovy                          | Sardinella anchovia         | 3.4 ± 0.5        | MP        | Pelagic         |
| guilt sardine                    | Sardinella aurita           | 3.4 ± 0.5        | MP        | Pelagic         |
| Brazilian sardinella             | Sardinella brasiliensis     | 3.1 ± 0.3        | P         | Pelagic         |
| sind sardinella                  | Sardinella sindensis        | 2.9 ± 0.3        | P         | Pelagic         |
| Pacific sardine                  | Sardinops sagax             | 2.4 ± 0.1        | P         | Pelagic         |
| salema                           | Sarpa salpa                 | 2 ± 0            | H         | Benthic         |
| gracile lizardfish               | Saurida gracilis            | 4.2 ± 0.7        | MP        | Benthic         |
| clouded lizardfish               | Saurida nebulosa            | 4.2 ± 0.73       | MP        | Demersal        |
| greater lizardfish               | Saurida tumbil              | 4.4 ± 0.8        | TP        | Demersal        |
| brushtooth lizardfish            | Saurida undosquamis         | 4.5 ± 0.8        | TP        | Demersal        |
| blue-barred parrotfish           | Scarus ghobban              | 2 ± 0            | H         | Benthic         |
| blunt-head parrotfish            | Scarus microrhinos          | 2 ± 0.01         | H         | Benthic         |
| rivulated parrotfish             | Scarus rivulatus            | 2 ± 0            | H         | Benthic         |
| yellowband parrotfish            | Scarus schlegeli            | 2 ± 0            | H         | Benthic         |
| daisy parrotfish                 | Scarus sordidus             | 2 ± 0            | H         | Benthic         |
| <b>parrotfishes</b>              | <b>Scarus spp.</b>          | <b>2 ± 0</b>     | <b>H</b>  | <b>Benthic</b>  |
| Imperial blackfish               | Schedophilus ovalis         | 3.5 ± 0.57       | MP        | Pelagic         |
| goatee croaker                   | Sciaena russelli            | 3.5 ± 0.5        | MP        | Demersal        |
| red drum                         | Sciaenops ocellatus         | 4.1 ± 0.7        | MP        | Demersal        |
| spadenose shark                  | Scoliodon laticaudus        | 3.8 ± 0.6        | MP        | Pelagic         |
| Pacific/chub mackerel            | Scomber japonicus           | 3.1 ± 0.4        | MP        | Pelagic         |
| mackerel                         | Scomber scombrus            | 3.7 ± 0.6        | MP        | Pelagic         |
| talang queenfish                 | Scomberoides commersonianus | 4.5 ± 0.8        | TP        | Pelagic         |
| doublespotted queenfish          | Scomberoides lysan          | 4.5 ± 0.8        | TP        | Pelagic         |
| king mackerel                    | Scomberomorus cavalla       | 4.5 ± 0.8        | TP        | Pelagic         |
| narrowbarred spanish mackerel    | Scomberomorus commerson     | 4.5 ± 0.8        | TP        | Pelagic         |
| Indo-Pacific king mackerel       | Scomberomorus guttatus      | 4.3 ± 0.67       | TP        | Pelagic         |
| Korean mackerel; Korean seerfish | Scomberomorus koreanus      | 4.2 ± 0.74       | TP        | Pelagic         |
| Altantic spanish mackerel        | Scomberomorus maculatus     | 4.5 ± 0.5        | TP        | Pelagic         |
| cero                             | Scomberomorus regalis       | 4.5 ± 0.4        | MP        | Pelagic         |
| Pacific sierra                   | Scomberomorus sierra        | 4.5 ± 0.8        | TP        | Pelagic         |
| <b>mackerels</b>                 | <b>Scomberomorus spp.</b>   | <b>4.4 ± 0.7</b> | <b>MP</b> | <b>Pelagic</b>  |
| Japanese spanish mackerel        | Scomberomrus nipponius      | 4.5 ± 0.8        | TP        | Pelagic         |
| <b>windowpane</b>                | <b>Scophthalmus aquosus</b> | <b>3 ± 0</b>     | <b>MP</b> | <b>Demersal</b> |
| brill                            | Scophthalmus rhombus        | 4.4 ± 0.1        | MP        | Benthic         |
| black scorpionfish               | Scorpaena porcus            | 3.9 ± 0.7        | MP        | Demersal        |
| <b>scorpionfishes</b>            | <b>Scorpaena spp.</b>       | <b>3.9 ± 0.7</b> | <b>MP</b> | <b>Demersal</b> |
| lesser spotted dogfish           | Scyliorhinus canicula       | 3.7 ± 0.6        | MP        | Demersal        |
| Pacific ocean perch              | Sebastes alutus             | 3.5 ± 0.3        | MP        | Demersal        |
| kelp rockfish                    | Sebastes atrovirens         | 3.4 ± 0.48       | MP        | Demersal        |
| red fish                         | Sebastes marinus            | 4 ± 0.68         | MP        | Pelagic         |
| black rockfish                   | Sebastes melanops           | 4.4 ± 0.8        | MP        | Demersal        |
| canary rockfish                  | Sebastes pinniger           | 3.8 ± 0.61       | MP        | Demersal        |
| scorpionfish                     | Sebastiscus marmoratus      | 3.6 ± 0.6        | MP        | Demersal        |
| broadbanded thornyhead           | Sebastolobus macrochir      | 3.3 ± 0.5        | MP        | Demersal        |

|                        |                          |                  |           |                |
|------------------------|--------------------------|------------------|-----------|----------------|
| oxeye scad             | Selar boops              | 3.5 ± 0.41       | MP        | Demersal       |
| bigeye scad            | Selar crumenophthalmus   | 4.1 ± 0.7        | TP        | Pelagic        |
| yellowstripe scad      | Selaroides leptolepis    | 3.5 ± 0.5        | MP        | Demersal       |
| Atlantic moonfish      | Selene setapinnis        | 3.7 ± 0.52       | MP        | Demersal       |
| lookdown               | Selene vomer             | 4.3 ± 0.6        | MP        | Demersal       |
| striped butterfish     | Selenotoca multifasciata | 2.9 ± 0.3        | H         | Benthic        |
| amberjack              | Seriola dumerili         | 4.5 ± 0.8        | TP        | Pelagic        |
| yellowtail             | Seriola lalandi          | 4.1 ± 0.3        | TP        | Pelagic        |
| almaco jack            | Seriola rivoliana        | 4.5 ± 0.8        | TP        | Pelagic        |
| banded rudderfish      | Seriola zonata           | 4.5 ± 0.8        | TP        | Demersal       |
| comber                 | Serranus cabrilla        | 3.4 ± 0.3        | MP        | Demersal       |
| brown comber           | Serranus hepatus         | 3.5 ± 0.4        | MP        | Demersal       |
| barred rockcod         | Serranus novemcinctus    | 3.7 ± 0.56       | MP        | Demersal       |
| painted comber         | Serranus scriba          | 3.8 ± 0.6        | MP        | Demersal       |
| obtuse barracuda       | Shyraena obstusata       | 4.5 ± 0.8        | TP        | Pelagic        |
| slimy spinefoot        | Siganus canaliculatus    | 2.8 ± 0.31       | H         | Benthic        |
| houttuyn               | Siganus fuscescens       | 2.3 ± 0.13       | H         | Benthic        |
| streaked spinefoot     | Siganus javus            | 2.4 ± 0.8        | H         | Benthic        |
| rabbit fish            | Siganus oramin           | 2.8 ± 0.31       | H         | Benthic        |
| gold-spotted spinefoot | Siganus punctatus        | 2.8 ± 0.1        | H         | Benthic        |
| little spinefoot       | Siganus spinus           | 2 ± 0            | H         | Benthic        |
| rabbitfish             | Siganus vermiculatus     | 2 ± 0            | H         | Benthic        |
| summer whiting         | Sillago ciliata          | 3.2 ± 0.4        | P         | Benthic        |
| silver sillago         | Sillago sihama           | 3.4 ± 0.5        | P         | Demersal       |
| snubnosed eel          | Simenchelys parasitica   | 3.7 ± 0.54       | MP        | Demersal       |
| sole                   | Solea solea              | 3.1 ± 0.3        | P         | Benthic        |
| frogfish               | Solea vulgaris           | 3.1 ± 0.3        | P         | Benthic        |
| Greenland shark        | Somniosus microcephalus  | 4.2 ± 0.6        | TP        | Demersal       |
| seabream               | Sparus aurata            | 3.8 ± 0.6        | MP        | Demersal       |
| yellowfin porgy        | Sparus latus             | 3.2 ± 0.5        | P         | Benthic        |
| bullseye puffer        | Sphoeroides annulatus    | 3.1 ± 0.44       | MP        | Demersal       |
| great barracuda        | Sphyraena barracuda      | 4.5 ± 0.6        | TP        | Pelagic        |
| bigeye barracuda       | Sphyraena forsteri       | 4.3 ± 0.8        | TP        | Pelagic        |
| Guachanche barracuda   | Sphyraena guachancho     | 3.9 ± 0.6        | MP        | Pelagic        |
| Japanese barracuda     | Sphyraena japonica       | 4.2 ± 0.73       | MP        | Pelagic        |
| pickhandle barracuda   | Sphyraena jello          | 4.5 ± 0.8        | TP        | Pelagic        |
| obtuse barracuda       | Sphyraena obtusata       | 4.5 ± 0.8        | TP        | Pelagic        |
| <b>barracudas</b>      | <b>Sphyraena spp.</b>    | <b>4.3 ± 0.8</b> | <b>TP</b> | <b>Pelagic</b> |
| barracuda              | Sphyraena sphyraena      | 4 ± 0.51         | TP        | Pelagic        |
| scalloped hammerhead   | Sphyrna lewini           | 4.1 ± 0.5        | TP        | Pelagic        |
| bonnethead shark       | Sphyrna tiburo           | 3.9 ± 0.5        | TP        | Demersal       |
| hammerhead shark       | Sphyrna zygaena          | 4.5 ± 0.8        | TP        | Pelagic        |
| blotched picarel       | Spicara maena            | 4.2 ± 0.7        | TP        | Demersal       |
| picarel                | Spicara smaris           | 3 ± 0            | P         | Demersal       |
| sprat                  | Sprattus sprattus        | 3 ± 0            | P         | Pelagic        |
| spiny dogfish          | Squalus acanthias        | 4.3 ± 0.7        | TP        | Demersal       |
| longnose spurdog       | Squalus blainvillei      | 4 ± 0.6          | TP        | Pelagic        |
| dogfish shark          | Squalus japonicus        | 4.4 ± 0.7        | TP        | Demersal       |

|                              |                                           |                  |           |                |
|------------------------------|-------------------------------------------|------------------|-----------|----------------|
| shortnose spurdog            | <i>Squalus megalops</i>                   | 4.3 ± 0.3        | TP        | Demersal       |
| shortspine spurdog           | <i>Squalus mitsukurii</i>                 | 4.4 ± 0.3        | TP        | Demersal       |
| Argentine angelshark         | <i>Squatina argentina</i>                 | 4.1 ± 0.7        | MP        | Benthic        |
| Northern lampfish            | <i>Stenobranchius leucopsarus</i>         | 3.2 ± 0.3        | P         | Demersal       |
| garnet lanternfish           | <i>Stenobranchius nannochir</i>           | 3.1 ± 0.2        | P         | Demersal       |
| scup; porgy                  | <i>Stenotomus chrysops</i>                | 3.8 ± 0.1        | MP        | Benthic        |
| Chinese silver pomfret       | <i>Stromateus sinensis</i>                | 3.6 ± 0.38       | MP        | Pelagic        |
| halfmoon triggerfish         | <i>Sufflamen chrysoptera</i>              | 3.5 ± 0.41       | MP        | Demersal       |
| <b>lanternfishes</b>         | <b><i>Symbolophorus spp.</i></b>          | <b>3.4 ± 0.5</b> | <b>MP</b> | <b>Pelagic</b> |
| tongue sole                  | <i>Symphurus nigrescens</i>               | 3.3 ± 0.4        | MP        | Demersal       |
| Japanese splitfin            | <i>Synagrops japonicus</i>                | 4.3 ± 0.73       | MP        | Demersal       |
| shortdorsal cutthroat eel    | <i>Synaphobranchus brevidorsalis</i>      | 4.1 ± 0.6        | MP        | Benthic        |
| Kaup's arrowtooth eel        | <i>Synaphobranchus kaupii</i>             | 4.1 ± 0.6        | TP        | Demersal       |
| goby                         | <i>Synechogobius hasta</i>                | 3 ± 0            | P         | Demersal       |
| inshore lizardfish           | <i>Synodus foetens</i>                    | 4.5 ± 0          | TP        | Demersal       |
| lizardfish                   | <i>Synodus macrops</i>                    | 4 ± 0.67         | MP        | Demersal       |
| sickle pomfret               | <i>Taractichthys steindachneri</i>        | 4.3 ± 0.6        | MP        | Pelagic        |
| tautog                       | <i>Tautoga onitis</i>                     | 3.3 ± 0.47       | MP        | Demersal       |
| cunner                       | <i>Tautogolabrus adspersus</i>            | 3.7 ± 0.2        | MP        | Benthic        |
| Indian shad                  | <i>Tenualosa ilisha</i>                   | 2 ± 0.1          | H         | Benthic        |
| Atlantic white marlin        | <i>Tetrapturus albidus</i>                | 4.5 ± 0.4        | TP        | Pelagic        |
| spearfish                    | <i>Tetrapturus angustirostris</i>         | 4.5 ± 0.76       | TP        | Pelagic        |
| striped marlin               | <i>Tetrapturus audax</i>                  | 4.6 ± 0.8        | TP        | Pelagic        |
| file fish                    | <i>Thamnaconus hypargyreus</i>            | 3.4 ± 0.44       | P         | Demersal       |
| <b>bluefin leatherjacket</b> | <b><i>Thamnaconus septentrionalis</i></b> | <b>3.4 ± 0.4</b> | <b>MP</b> | <b>Benthic</b> |
| pollock                      | <i>Theragra chalcogramma</i>              | 3.5 ± 0.5        | P         | Demersal       |
| small-scale banded therapon  | <i>Therapon puta</i>                      | 3.1 ± 0.41       | P         | Demersal       |
| China anchovy                | <i>Thryssa kammalensis</i>                | 3.1 ± 0.36       | P         | Pelagic        |
| oblique-jaw thryssa          | <i>Thryssa purava</i>                     | 3.5 ± 0.5        | MP        | Pelagic        |
| albacore tuna                | <i>Thunnus alalunga</i>                   | 4.3 ± 0.7        | TP        | Pelagic        |
| yellowfin tuna               | <i>Thunnus albacares</i>                  | 4.3 ± 0.7        | TP        | Pelagic        |
| blackfin tuna                | <i>Thunnus atlanticus</i>                 | 4.4 ± 0.3        | TP        | Pelagic        |
| bluefin tuna                 | <i>Thunnus maccoyii</i>                   | 4.2 ± 0.6        | TP        | Pelagic        |
| bigeye tuna                  | <i>Thunnus obesus</i>                     | 4.5 ± 0          | TP        | Pelagic        |
| Pacific bluefin tuna         | <i>Thunnus orientalis</i>                 | 4.2 ± 0.6        | TP        | Pelagic        |
| <b>tunas</b>                 | <b><i>Thunnus spp.</i></b>                | <b>4.2 ± 0.6</b> | <b>TP</b> | <b>Pelagic</b> |
| Atlantic bluefin tuna        | <i>Thunnus thynnus</i>                    | 4.4 ± 0.8        | TP        | Pelagic        |
| long tail tuna               | <i>Thunnus tonggol</i>                    | 4.5 ± 0.8        | TP        | Pelagic        |
| snoek                        | <i>Thysites atun</i>                      | 3.7 ± 0.6        | MP        | Pelagic        |
| electric ray                 | <i>Torpedo nobiliana</i>                  | 4.5 ± 0.6        | TP        | Demersal       |
| snubnose pompano             | <i>Trachinotus blochii</i>                | 3.7 ± 0.46       | MP        | Benthic        |
| pompano                      | <i>Trachinotus carolinus</i>              | 3.5 ± 0.6        | MP        | Benthic        |
| permit                       | <i>Trachinotus falcatus</i>               | 4 ± 0.2          | MP        | Benthic        |
| paloma pompano               | <i>Trachinotus paitensis</i>              | 3.7 ± 0.55       | MP        | Benthic        |
| greater weever               | <i>Trachinus draco</i>                    | 4.2 ± 0.71       | TP        | Demersal       |
| horse mackerel               | <i>Trachurus japonicus</i>                | 3.4 ± 0.45       | MP        | Pelagic        |
| horse mackerel               | <i>Trachurus mediterraneus</i>            | 3.6 ± 0.4        | MP        | Pelagic        |
| blue jack mackerel           | <i>Trachurus picturatus</i>               | 3.3 ± 0.42       | MP        | Demersal       |



|                          |                                    |            |    |          |
|--------------------------|------------------------------------|------------|----|----------|
| Atlantic horse mackerel  | <i>Trachurus trachurus</i>         | 3.6 ± 0.6  | MP | Pelagic  |
| sharp-spined notothenia  | <i>Trematomus centronotus</i>      | 3.3 ± 0.4  | MP | Demersal |
| blunt scalyhead          | <i>Trematomus eulepidotus</i>      | 3.3 ± 0.5  | MP | Pelagic  |
| crocodile icefish        | <i>Trematomus newnes</i>           | 3.7 ± 0.6  | MP | Demersal |
| leopard shark            | <i>Triakis semifasciata</i>        | 3.7 ± 0.5  | TP | Benthic  |
| large-headed cutlassfish | <i>Trichiurus haumela</i>          | 4.5 ± 0.8  | TP | Pelagic  |
| largehead hairtail       | <i>Trichiurus japonicus</i>        | 4.5 ± 0.8  | MP | Pelagic  |
| largehead hairtail       | <i>Trichiurus lepturus</i>         | 4.5 ± 0.8  | MP | Pelagic  |
| Shimofuri goby           | <i>Tridentiger bifasciatus</i>     | 3.4 ± 0.4  | MP | Demersal |
| gurnard                  | <i>Trigla lucerna</i>              | 3.7 ± 0.6  | MP | Demersal |
| piper                    | <i>Trigla lyra</i>                 | 3.5 ± 0.5  | MP | Demersal |
| streaked gurnard         | <i>Trigloporus lastoviza</i>       | 3.4 ± 0.5  | MP | Demersal |
| Norway pout              | <i>Trisopterus esmarkii</i>        | 3.2 ± 0.4  | MP | Pelagic  |
| bib                      | <i>Trisopterus luscus</i>          | 3.7 ± 0.6  | MP | Benthic  |
| poor cod                 | <i>Trisopterus minutus</i>         | 3.8 ± 0.5  | MP | Benthic  |
| longtom                  | <i>Tylosurus gavialoides</i>       | 4.4 ± 0.8  | TP | Benthic  |
| sand drum                | <i>Umbrina coroides</i>            | 3.1 ± 0.2  | P  | Demersal |
| goat fish                | <i>Upeneus japonicus</i>           | 3.6 ± 0.38 | MP | Demersal |
| goldband goatfish        | <i>Upeneus moluccensis</i>         | 3.6 ± 0.6  | MP | Pelagic  |
| Brazilian codling        | <i>Urophycis brasiliensis</i>      | 3.8 ± 0.6  | MP | Demersal |
| white hake               | <i>Urophycis tenuis</i>            | 4.2 ± 0.7  | MP | Demersal |
| kanda                    | <i>Valamugil engeli</i>            | 2.5 ± 0.2  | P  | Demersal |
| bluespot grey mullet     | <i>Valamugil seheli</i>            | 2.3 ± 0.14 | H  | Benthic  |
| swordfish                | <i>Xiphias gladius</i>             | 4.5 ± 0.6  | TP | Pelagic  |
| banded guitarfish        | <i>Zapteryx exasperata</i>         | 3.6 ± 0.53 | MP | Benthic  |
| halfbeak                 | <i>Zenarchopterus buffonis</i>     | 2.5 ± 0.5  | P  | Pelagic  |
| deep-sea fish            | <i>Zenion hololepis</i>            | 3.7 ± 0.6  | MP | Demersal |
| dories                   | <i>Zenopsis nebulosa</i>           | 4 ± 0.65   | MP | Benthic  |
| john dory                | <i>Zeus faber</i>                  | 4.5 ± 0.8  | TP | Demersal |
| eelpout                  | <i>Zoarces viviparus</i>           | 3.5 ± 0.49 | MP | Demersal |
| grass goby               | <i>Zosterisessor ophiocephalus</i> | 3.1 ± 0.4  | MP | Benthic  |

Note: Bold selections reflect estimated trophic and ecological information (FishBase)

### Supplemental Table 8. Seafood Database Reference List

- Adams D.H. (2004). Total mercury levels in tunas from offshore waters of the Florida Atlantic coast. *Mar Pollut Bull*, 49, 659-663.
- Adams D.H. & McMichael R.H. (1999). Mercury levels in four species of sharks from the Atlantic coast of Florida. *Fish B-Noaa*, 97, 372-379.
- Adams D.H. & McMichael R.H. (2007). Mercury in king mackerel, *Scomberomorus cavalla*, and Spanish mackerel, *S. maculatus*, from waters of the south-eastern USA: regional and historical trends. *Mar Freshwater Res*, 58, 187-193.
- Adams D.H., McMichael R.H. & Henderson G.E. (2003). Florida Marine Research Institute Technical Reports: Mercury levels in marine and estuarine fishes of Florida 1989-2001. In. Florida Fish and Wildlife Conservation Commission, Florida Marine Research Institution.
- Adams D.H., Sonne C., Basu N., Dietz R., Nam D.H., Leifsson P.S. & Jensen A.L. (2010). Mercury contamination in spotted seatrout, *Cynoscion nebulosus*: An assessment of liver, kidney, blood, and nervous system health. *Sci Total Environ*, 408, 5808-5816.
- Adeyemi D., Ukpo G., Anyakora C. & Uyimadu J. (2009). Polychlorinated biphenyl in fish samples from Lagos Lagoon, Nigeria. *African Journal of Biotechnology*, 8, 2811-2815.
- Afonso C., Lourenco H.M., Pereira C., Martins M.F., Carvalho M.L., Castro M. & Nunes M.L. (2008). Total and organic mercury, selenium and alpha-tocopherol in some deep-water fish species. *J Sci Food Agr*, 88, 2543-2550.
- Al-Shwafi N., Al-trabeen K. & Rasheed M. (2009). Organochlorine pesticides and polychlorinated biphenyls carcinogens residual in some fish and shell fish of Yemen. *Jordan Journal of Biological Sciences*, 2, 23-28.
- Andersen J.L. & Depledge M.H. (1997). A survey of total mercury and methylmercury in edible fish and invertebrates from Azorean waters. *Marine Environmental Research*, 44, 331-350.
- Andersson O., Linder C.E., Olsson M., Reutergardh L., Uvemo U.B. & Wideqvist U. (1988). Spatial differences and temporal trends of organochlorine compounds in biota from the northwestern hemisphere. *Archives of Environmental Contamination and Toxicology*, 17, 755-765.
- Arcos J.M., Ruiz X., Bearhop S. & Furness R.W. (2002). Mercury levels in seabirds and their fish prey at the Ebro Delta (NW Mediterranean): the role of trawler discards as a source of contamination. *Mar Ecol Prog Ser*, 232, 281-290.
- Atuma S., Linder C.-E., Bergh A., Wicklund-Glynn A., Andersson O. & Jahnsson H. (1996). Levels of selected coplanar PCBs in fish from the Swedish water environment. *Organohalogen Compounds*, 28, 4.
- Baeyens W., Leermakers M., Papina T., Saprykin A., Brion N., Noyen J., De Gieter M., Elskens M. & Goeyens L. (2003). Bioconcentration and biomagnification of mercury and methylmercury in North Sea and Scheldt estuary fish. *Arch Environ Contam Toxicol*, 45, 498-508.
- Bank M.S., Chesney E., Shine J.P., Maage A. & Senn D.B. (2007). Mercury bioaccumulation and trophic transfer in sympatric snapper species from the Gulf of Mexico. *Ecol Appl*, 17, 2100-2110.
- Baptista J., Pato P., Pereira E., Duarte A.C. & Pardal M.A. (2013). PCBs in the fish assemblage of a southern European estuary. *Journal of Sea Research*, 76, 22-30.
- Baron E., Rudolph I., Chiang G., Barra R., Eljarrat E. & Barcelo D. (2013). Occurrence and behavior of natural and anthropogenic (emerging and historical) halogenated compounds in marine biota from the Coast of Concepcion (Chile). *Sci Total Environ*, 461, 258-264.

- Barska I. & Skrzynski I. (2003). Contents of methylmercury and total mercury in Baltic Sea fish and fish products. In. Bulletin of the Sea Fisheries Institute, pp. 3-15.
- Basturk O., Dogan M., Salihoglu I. & Balkas T.I. (1980). DDT, DDE, and PCB residues in fish, crustaceans and sediments from the eastern Mediterranean coast of Turkey. *Mar Pollut Bull*, 11, 191-195.
- Bayarri S., Baldassarri L.T., Iacovella N., Ferrara F. & di Domenico A. (2001). PCDDs, PCDFs, PCBs and DDE in edible marine species from the Adriatic Sea. *Chemosphere*, 43, 601-610.
- Bayen S., Wurl O., Karuppiyah S., Sivasothi N., Lee H.K. & Obbard J.P. (2005). Persistent organic pollutants in mangrove food webs in Singapore. *Chemosphere*, 61, 303-313.
- Bebianno M.J., Santos C., Canario J., Gouveia N., Sena-Carvalho D. & Vale C. (2007). Hg and metallothionein-like proteins in the black scabbardfish *Aphanopus carbo*. *Food Chem Toxicol*, 45, 1443-1452.
- Bloom N.S. (1992). On the chemical form of mercury in edible fish and marine invertebrate tissue. *Canadian Journal of Fisheries and Aquatic Sciences*, 49, 1010-1017.
- Bodin N., Abarnou A., Fraise D., Defour S., Loizeau V., Le Guellec A.M. & Philippon X. (2007). PCB, PCDD/F and PBDE levels and profiles in crustaceans from the coastal waters of Brittany and Normandy (France). *Mar Pollut Bull*, 54, 657-668.
- Boon J.P., Lewis W.E., Tjoen-A-Choy M.R., Allchin C.R., Law R.J., de Boer J., ten Hallers-Tjabbes C.C. & Zegers B.N. (2002). Levels of polybrominated diphenyl ether (PBDE) flame retardants in animals representing different trophic levels of the North Sea food web. *Environ Sci Technol*, 36, 4025-4032.
- Borghesi N., Corsolini S., Leonards P., Brandsma S., de Boer J. & Focardi S. (2009). Polybrominated diphenyl ether contamination levels in fish from the Antarctic and the Mediterranean Sea. *Chemosphere*, 77, 693-698.
- Braune B.M. (1987). Mercury accumulation in relation to size and age of Atlantic herring (*Clupea harengus harengus*) from the southwestern Bay of Fundy, Canada. *Archives of Environmental Contamination and Toxicology*, 16, 311-320.
- Bright D.A., Dushenko W.T., Grundy S.L. & Reimer K.J. (1995). Effects of local and distant contaminant sources: Polychlorinated biphenyls and other organochlorines in bottom-dwelling animals from an Arctic estuary. *Sci Total Environ*, 160-61, 265-283.
- Brown F.R., Winkler J., Visita P., Dhaliwal J. & Petreas M. (2006). Levels of PBDEs, PCDDs, PCDFs, and coplanar PCBs in edible fish from California coastal waters. *Chemosphere*, 64, 276-286.
- Burger J., Gochfeld M., Jeitner C., Burke S. & Stamm T. (2007c). Metal levels in flathead sole (*Hippoglossoides elassodon*) and great sculpin (*Myoxocephalus polyacanthocephalus*) from Adak Island, Alaska: Potential risk to predators and fishermen. *Environ Res*, 103, 62-69.
- Burger J., Gochfeld M., Jeitner C., Burke S., Stamm T., Snigaroff R., Snigaroff D., Patrick R. & Weston J. (2007b). Mercury levels and potential risk from subsistence foods from the Aleutians. *Sci Total Environ*, 384, 93-105.
- Burger J., Gochfeld M., Shukla T., Jeitner C., Burke S., Donio M., Shukla S., Snigaroff R., Snigaroff D., Stamm T. & Volz C. (2007a). Heavy metals in Pacific Cod (*Gadus macrocephalus*) from the Aleutians: Location, age, size, and risk. *J Toxicol Env Heal A*, 70, 1897-1911.
- Burger J., Jeitner C., Donio M., Shukla S. & Gochfeld M. (2009). Factors affecting mercury and selenium levels in New Jersey flatfish: Low risk to human consumers. *J Toxicol Env Heal A*, 72, 853-860.
- Burger J., Jeitner C. & Gochfeld M. (2011). Locational differences in mercury and selenium levels in 19 species of saltwater fish from New Jersey. *J Toxicol Env Heal A*, 74, 863-874.

- Burreau S., Zebuhr Y., Broman D. & Ishaq R. (2006). Biomagnification of PBDEs and PCBs in food webs from the Baltic Sea and the northern Atlantic ocean. *Sci Total Environ*, 366, 659-672.
- Cai Y., Rooker J.R., Gill G.A. & Turner J.P. (2007). Bioaccumulation of mercury in pelagic fishes from the northern Gulf of Mexico. *Canadian Journal of Fisheries and Aquatic Sciences*, 64, 458-469.
- Cakirogullari G.C., Kilic D. & Ucar Y. (2010). Levels of polychlorinated dibenzo-p-dioxins, dibenzo-p-furans and polychlorinated biphenyls in farmed sea bass (*Dicentrarchus labrax*) and sea bream (*Sparus aurata*) from Turkey. *Food Control*, 21, 1245-1249.
- Cakirogullari G.C. & Secer S. (2010). Levels of DDTs and indicator polychlorinated biphenyls in Whiting (*Merlangius merlangus euxinus* N. 1840) and Horse mackerel (*Trachurus mediterraneus* S. 1868) from the Izmit Bay, Turkey. *Turkish Journal of Fisheries and Aquatic Sciences*, 10, 415-422.
- Cakirogullari G.C., Ucar Y., Oymael B., Bozkurt E.N. & Kilic D. (2010). PCDD/F, dl-PCB and Indicator PCBs in Whiting, Horse Mackerel and Anchovy in Black Sea in Turkey. *Turkish Journal of Fisheries and Aquatic Sciences*, 10, 357-362.
- Canedo-Lopez Y. & Macias-Zamora J.V. (2007). Polychlorinated dibenzo-p-dioxins and dibenzofurans in fish from four different regions of Mexico. *Ciencias Marinas*, 33, 217-227.
- Capelli R., Contardi V., Cosma B., Minganti V. & Zanicchi G. (1983). A 4-year study on the distribution of some heavy metals in 5 marine organisms of the Ligurian Sea. *Marine Chemistry*, 12, 281-293.
- Capelli R., Drava G., Siccardi C., De Pellegrini R. & Minganti V. (2004). Study of the distribution of trace elements in six species of marine organisms of the Ligurian Sea (north-western Mediterranean) - Comparison with previous findings. *Ann Chim-Rome*, 94, 533-546.
- Capelli R., Minganti V. & Bernhard M. (1987). Total mercury, organic mercury, copper, manganese, selenium, and zinc in *Sarda sarda* from the Gulf of Genoa. *Sci Total Environ*, 63, 83-99.
- Carlsson P., Herzke D., Wedborg M. & Gabrielsen G.W. (2011). Environmental pollutants in the Swedish marine ecosystem, with special emphasis on polybrominated diphenyl ethers (PBDE). *Chemosphere*, 82, 1286-1292.
- Carubelli G., Fanelli R., Mariam G., Nichetti S., Crosa G., Calarnari D. & Fattore E. (2007). PCB contamination in farmed and wild sea bass (*Dicentrarchus labrax* L.) from a coastal wetland area in central Italy. *Chemosphere*, 68, 1630-1635.
- Chen M.H., Chen C.Y., Chang S.K. & Huang S.W. (2007). Total and organic mercury concentrations in the white muscles of swordfish (*Xiphias gladius*) from the Indian and Atlantic oceans. *Food Addit Contam*, 24, 969-75.
- Cheung K.C., Leung H.M. & Wong M.H. (2008). Metal concentrations of common freshwater and marine fish from the Pearl River Delta, South China. *Archives of Environmental Contamination and Toxicology*, 54, 705-715.
- Chouvelon T., Warnau M., Churlaud C. & Bustamante P. (2009). Hg concentrations and related risk assessment in coral reef crustaceans, molluscs and fish from New Caledonia. *Environ. Pollut.*, 157, 331-340.
- Cipro C.V.Z., Colabuono F.I., Taniguchi S. & Montone R.C. (2013). Persistent organic pollutants in bird, fish and invertebrate samples from King George Island, Antarctica. *Antarctic Science*, 25, 545-552.
- Coelhan M., Strohmeier J. & Barlas H. (2006). Organochlorine levels in edible fish from the Marmara Sea, Turkey. *Environment International*, 32, 775-780.

- Collings S.E., Johnson M.S. & Leah R.T. (1996). Metal contamination of angler-caught fish from the Mersey Estuary. *Marine Environmental Research*, 41, 281-297.
- Contardi V., Capelli R., Pellacani T. & Zanicchi G. (1979). PCBs and chlorinated pesticides in organisms from the Ligurian Sea. *Mar Pollut Bull*, 10, 307-311.
- Cornish A.S., Ng W.C., Ho V.C.M., Wong H.L., Lam J.C.W., Lam P.K.S. & Leung K.M.Y. (2007). Trace metals and organochlorines in the bamboo shark *Chiloseyllum plagiosum* from the southern waters of Hong Kong, China. *Sci Total Environ*, 376, 335-345.
- Corsolini S., Ademollo N., Mariottini M., Fossi S., Guerranti C., Perra G., Duhamel G. & Focardi S. (2002). Polychlorinated biphenyls, polychlorinated-dibenzodioxins and -dibenzofurans in mackerel icefish and marbled rockcod from the Kerguelen Islands (Antarctica). *Organohalogen Compounds*, 57, 161-164.
- Corsolini S., Ademollo N., Romeo T., Olmastroni S. & Focardi S. (2003). Persistent organic pollutants in some species of a Ross Sea pelagic trophic web. *Antarctic Science*, 15, 95-104.
- Corsolini S., Focardi S., Kannan K., Tanabe S., Borrell A. & Tatsukawa R. (1995). Congener profile and toxicity assessment of polychlorinated biphenyls in dolphins, sharks, and tuna collected from Italian coastal waters. *Marine Environmental Research*, 40, 33-53.
- Corsolini S., Guerranti C., Perra G. & Focardi S. (2008). Polybrominated diphenyl ethers, perfluorinated compounds and chlorinated pesticides in swordfish (*Xiphias gladius*) from the Mediterranean Sea. *Environ Sci Technol*, 42, 4344-4349.
- Corsolini S., Romeo T., Ademolla N., Greco S. & Focardi S. (2002). POPs in key species of marine Antarctic ecosystem. *Microchemical Journal*, 73, 187-193.
- Cronin M., Davies I.M., Newton A., Pirie J.M., Topping G. & Swan S. (1998). Trace metal concentrations in deep sea fish from the North Atlantic. *Marine Environmental Research*, 45, 225-238.
- Cross F.A., Hardy L.H., Jones N.Y. & Barber R.T. (1973). Relation between total-body weight and concentrations of manganese, iron, copper, zinc, and mercury in white muscle of bluefish (*Pomatomus saltatrix*) and a bathyl-demersal fish *Antimora rostrata*. *J Fish Res Board Can*, 30, 1287-1291.
- Cullon D.L., Yunker M.B., Alleyne C., Dangerfield N.J., O'Neill S., Whitticar M.J. & Ross P.S. (2009). Persistent organic pollutants in chinook salmon (*Oncorhynchus tshawytscha*): Implications for resident killer whales of British Columbia and adjacent waters. *Environ Toxicol Chem*, 28, 148-161.
- Cutshall N.H., Naidu J.R. & Percy W.G. (1978). Mercury concentrations in Pacific hake, *Merluccius Productus* (Ayres), as a function of length and latitude. *Science*, 200, 1489-1491.
- da Silva A.M.F., Lemes V.R.R., Barretto H.H.C., Oliveira E.S., de Alleluia I.B. & Paumgarten F.J.R. (2003). Polychlorinated biphenyls and organochlorine pesticides in edible fish species and dolphins from Guanabara Bay, Rio de Janeiro, Brazil. *Bulletin of Environmental Contamination and Toxicology*, 70, 1151-1157.
- Davodi M., Esmaili-Sari A. & Bahramifarr N. (2011). Concentration of polychlorinated biphenyls and organochlorine pesticides in some edible fish species from the Shadegan Marshes (Iran). *Ecotoxicology and Environmental Safety*, 74, 294-300.
- de Azevedo e Silva C.E., Azeredo A., Lima Dias A.d.C., Costa P., Lailson-Brito J., Malm O., Davee Guimaraes J.R. & Machado Torres J.P. (2009). Organochlorine compounds in sharks from the Brazilian coast. *Mar Pollut Bull*, 58, 294-298.

- de Brito A.P.X., Takahashi S., Ueno D., Iwata H., Tanabe S. & Kubodera T. (2002). Organochlorine and butyltin residues in deep-sea organisms collected from the western North Pacific, off-Tohoku, Japan. *Mar Pollut Bull*, 45, 348-361.
- De Marco S.G., Botte S.E. & Marcovecchio J.E. (2006). Mercury distribution in abiotic and biological compartments within several estuarine systems from Argentina: 1980-2005 period. *Chemosphere*, 65, 213-223.
- de Mora S., Fowler S.W., Tolosa I., Villeneuve J.P. & Cattini C. (2005). Chlorinated hydrocarbons in marine biota and coastal sediments from the Gulf and Gulf of Oman. *Mar Pollut Bull*, 50, 835-849.
- de Pinho A.P., Guimaraes J.R.D., Martins A.S., Costa P.A.S., Olavo G. & Valentin J. (2002). Total mercury in muscle tissue of five shark species from Brazilian offshore waters: Effects of feeding habit, sex, and length. *Environ Res*, 89, 250-258.
- Delval C., Fournier S. & Vigneault Y. (1986). Polychlorinated biphenyl residues in some marine organisms from the Baie des Anglais (Baie-Comeau, Quebec, Saint-Lawrence Estuary). *Bulletin of Environmental Contamination and Toxicology*, 37, 823-829.
- Denton G.R.W., Concepcion L.P., Wood H.R. & Morrison R.J. (2006). Polychlorinated biphenyls (PCBs) in marine organisms from four harbours in Guam. *Mar Pollut Bull*, 52, 214-226.
- Deshpande A., Bhendigeri S., Shirsekar T., Dhaware D. & Khandekar R.N. (2009). Analysis of heavy metals in marine fish from Mumbai Docks. *Environ Monit Assess*, 159, 493-500.
- Deshpande A.D., Dockum B.W., Cleary T., Farrington C. & Wiczorek D. (2013). Bioaccumulation of polychlorinated biphenyls and organochlorine pesticides in young-of-the-year bluefish (*Pomatomus saltatrix*) in the vicinity of a Superfund Site in New Bedford Harbor, Massachusetts, and in the adjacent waters. *Mar Pollut Bull*, 72, 146-164.
- Deshpande A.D., Draxler A.F., Zdanowicz V.S., Schrock M.E. & Paulson A.J. (2000). Contaminant levels in the muscle of four species of fish important to the recreational fishery of the New York Bight Apex. *Mar Pollut Bull*, 44, 164-71.
- Dewailly E., Rouja P., Dallaire R., Pereg D., Tucker T., Ward J., Weber J.P., Maguire J.S. & Julien P. (2008). Balancing the risks and the benefits of local fish consumption in Bermuda. *Food Addit Contam A*, 25, 1328-1338.
- Di Bella G., Licata P., Bruzzese A., Naccari C., Trombetta D., Lo Turco V., Dugo G., Richetti A. & Naccari F. (2006). Levels and congener pattern of polychlorinated biphenyl and organochlorine pesticide residues in bluefin tuna (*Thunnus thynnus*) from the Straits of Messina (Sicily, Italy). *Environment International*, 32, 705-710.
- Di Muccio A., Stefanelli P., Funari E., Barbini A., Generali T., Pelosi P., Girolimetti S., Amendola G., Vanni F. & Di Muccio S. (2002). Organochlorine pesticides and polychlorinated biphenyl in 12 edible marine organisms from the Adriatic Sea, Italy, Spring 1997. *Food Addit Contam*, 19, 1148-1161.
- Dierking J., Wafo E., Schembri T., Lagadec V., Nicolas C., Letourneur Y. & Harmelin-Vivien M. (2009). Spatial patterns in PCBs, pesticides, mercury and cadmium in the common sole in the NW Mediterranean Sea, and a novel use of contaminants as biomarkers. *Mar Pollut Bull*, 58, 1605-14.
- Easton M.D.L., Luszniak D. & Von der Geest E. (2002). Preliminary examination of contaminant loadings in farmed salmon, wild salmon and commercial salmon feed. *Chemosphere*, 46, 1053-1074.

- Elhamri H., Idrissi L., Coquery M., Azemard S., El Abidi A., Benlemlih M., Saghi M. & Cubadda F. (2007). Hair mercury levels in relation to fish consumption in a community of the Moroccan Mediterranean coast. *Food Addit Contam*, 24, 1236-1246.
- Endo T., Minoshima Y., Hisamichi Y., Kimura O., Hayasaka M., Ogasawara H. & Haraguchi K. (2012). Levels of mercury and organohalogen compounds in the muscle and liver of Kidako moray eels (*Gymnothorax kidako*) caught off the southern region of Japan. *Biological & Pharmaceutical Bulletin*, 35, 1745-1751.
- Ernst W., Goerke H., Eder G. & Schaefer R.G. (1976). Residues of chlorinated hydrocarbons in marine organisms in relation to size and ecological parameters. I. PCB, DDT, DDE, and DDD in fishes and mollusks from the English Channel. *Bulletin of Environmental Contamination and Toxicology*, 15, 55-65.
- Escobar-Sanchez O., Galvan-Magana F. & Rosiles-Martinez R. (2010). Mercury and selenium bioaccumulation in the smooth hammerhead shark, *Sphyrna zygaena linnaeus*, from the Mexican Pacific Ocean. *Bulletin of Environmental Contamination and Toxicology*, 84, 488-491.
- Evans D.W. & Crumley P.H. (2005). Mercury in Florida Bay fish: Spatial distribution of elevated concentrations and possible linkages to Everglades restoration. *B Mar Sci*, 77, 321-345.
- Fairey R., Taberski K., Lamerdin S., Johnson E., Clark R.P., Downing J.W., Newman J. & Petreas M. (1997). Organochlorines and other environmental contaminants in muscle tissues of sportfish collected from San Francisco Bay. *Mar Pollut Bull*, 34, 13.
- Fairey R., Taberski K., Lamerdin S., Johnson E., Clark R.P., Downing J.W., Newman J. & Petreas M. (1997). Organochlorines and other environmental contaminants in muscle tissues of sportfish collected from San Francisco Bay. *Mar Pollut Bull*, 34, 1058-1071.
- Falandysz J. (1984). Organochlorine pesticides and polychlorinated biphenyls in herring from the southern Baltic, 1981. *Zeitschrift Fur Lebensmittel-Untersuchung Und-Forschung*, 179, 20-23.
- Falandysz J. (1984). Organochlorine pesticides and polychlorinated biphenyls in sprats from the southern Baltic, 1981. *Zeitschrift Fur Lebensmittel-Untersuchung Und-Forschung*, 178, 461-464.
- Falandysz J. (1985). Organochlorine pesticides and polychlorinated biphenyls in cod from the southern Baltic, 1981. *Zeitschrift Fur Lebensmittel-Untersuchung Und-Forschung*, 181, 316-317.
- Falandysz J. (1985). Organochlorine pesticides and polychlorinated biphenyls in flatfish from the southern Baltic, 1983. *Zeitschrift Fur Lebensmittel-Untersuchung Und-Forschung*, 181, 370-374.
- Falandysz J. (1986). Organochlorine pesticides and polychlorinated biphenyls in cod from southern Baltic, 1983. *Zeitschrift Fur Lebensmittel-Untersuchung Und-Forschung*, 182, 136-139.
- Falandysz J. (1986). Organochlorine pesticides and polychlorinated biphenyls in herring from southern Baltic, 1983. *Zeitschrift Fur Lebensmittel-Untersuchung Und-Forschung*, 182, 131-135.
- Falandysz J., Wyrzykowska B., Puzyn T., Strandberg L. & Rappe C. (2002). Polychlorinated biphenyls (PCBs) and their congener-specific accumulation in edible fish from the Gulf of Gdansk, Baltic Sea. *Food Addit Contam*, 19, 779-795.
- Fang J.K.H., Wu R.S.S., Zheng G.J., Au D.W.T., Lam P.K.S. & Shin P.K.S. (2009). The use of muscle burden in rabbitfish *Siganus oramin* for monitoring polycyclic aromatic hydrocarbons and polychlorinated biphenyls in Victoria Harbour, Hong Kong and potential human health risk. *Sci Total Environ*, 407, 4327-4332.

- Ferreira A.G., Faria V.V., de Carvalho C.E.V., Lessa R.P.T. & da Silva F.M.S. (2004). Total mercury in the night shark, *Carcharhinus signatus* in the western equatorial Atlantic Ocean. *Braz Arch Biol Techn*, 47, 629-634.
- Ferreira M., Antunes P., Costa J., Amado J., Gil O., Pousao-Ferreira P., Vale C. & Reis-Henriques M.A. (2008). Organochlorine bioaccumulation and biomarkers levels in culture and wild white seabream (*Diplodus sargus*). *Chemosphere*, 73, 1669-1674.
- Focardi S., Lari L. & Marsili L. (1992). PCB-congeners, DDTs and hexachlorobenzene in Antarctic fish from Terra Nova Bay (Ross Sea). *Antarctic Science*, 4, 151-154.
- Freeman H.C. & Horne D.A. (1973). Sampling edible muscle of swordfish (*Xiphias Gladius*) for total mercury analysis. *J Fish Res Board Can*, 30, 1251-1252.
- Froescheis O., Looser R., Cailliet G.M., Jarman W.M. & Ballschmiter K. (2000). The deep-sea as a final global sink of semivolatile persistent organic pollutants? Part I: PCBs in surface and deep-sea dwelling fish of the North and South Atlantic and the Monterey Bay Canyon (California). *Chemosphere*, 40, 651-660.
- García-Hernández J., Cadena-Cárdenas L., Betancourt-Lozano M., García-De-La-Parra L.M., García-Rico L. & Márquez-Farías F. (2007). Total mercury content found in edible tissues of top predator fish from the Gulf of California, Mexico. *Toxicological & Environmental Chemistry*, 89, 507-522.
- Gassel M., Harwani S., Park J.-S. & Jahn A. (2013). Detection of nonylphenol and persistent organic pollutants in fish from the North Pacific Central Gyre. *Mar Pollut Bull*, 73, 231-242.
- Gelsleichter J., Manire C.A., Szabo N.J., Cortes E., Carlson J. & Lombardi-Carlson L. (2005). Organochlorine concentrations in bonnethead sharks (*Sphyrna tiburo*) from four Florida estuaries. *Archives of Environmental Contamination and Toxicology*, 48, 474-483.
- Geyer H., Freitag D. & Korte F. (1984). Polychlorinated biphenyls (PCBs) in the marine environment, particularly in the Mediterranean. *Ecotoxicology and Environmental Safety*, 8, 129-151.
- Giam C.S., Chan H.S. & Neff G.S. (1978). Phthalate ester plasticizers, DDT, DDE, and polychlorinated biphenyls in biota from Gulf of Mexico. *Mar Pollut Bull*, 9, 249-251.
- Gilmartin M. & Revelante N. (1975). Concentration of mercury, copper, nickel, silver, cadmium, and lead in Northern Adriatic anchovy, *Engraulis encrasicolus*, and sardine, *Sardinap pilchardus*. *Fish B-Noaa*, 73, 193-201.
- Gochfeld M., Burger J., Jeitner C., Donio M. & Pittfield T. (2012). Seasonal, locational and size variations in mercury and selenium levels in striped bass (*Morone saxatilis*) from New Jersey. *Environ Res*, 112, 8-19.
- Goncalves da Silva S.F., Bruening I.M.R.A., Montone R.C., Taniguchi S., Cascaes M.J., Dias P.S., Lavandier R.C., Hauser-Davis R.A. & Moreira I. (2013). Polybrominated diphenyl ethers (PBDES) and polychlorinated biphenyls (PCBS) in mussels and two fish species from the estuary of the Guanabara Bay, southeastern Brazil. *Bulletin of Environmental Contamination and Toxicology*, 91, 261-266.
- Gossett R., Puffer H.W., Arthur R.H.J. & Young D.R. (1983). DDT, PCB and benzo(a)pyrene levels in white croaker (*Genyonemus lineatus*) from Southern California. *Mar Pollut Bull*, 14, 6.
- Goutte A., Chevreuil M., Alliot F., Chastel O., Cherel Y., Eleaume M. & Masse G. (2013). Persistent organic pollutants in benthic and pelagic organisms off Adelie Land, Antarctica. *Mar Pollut Bull*, 77, 82-89.



- Green N.W. & Knutzen J. (2003). Organohalogenes and metals in marine fish and mussels and some relationships to biological variables at reference localities in Norway. *Mar Pollut Bull*, 46, 362-374.
- Greenfield B.K. & Allen R.M. (2013). Polychlorinated biphenyl spatial patterns in San Francisco Bay forage fish. *Chemosphere*, 90, 1693-1703.
- Greenfield B.K., Davis J.A., Fairey R., Roberts C., Crane D. & Ichikawa G. (2005). Seasonal, interannual, and long-term variation in sport fish contamination, San Francisco Bay. *Sci Total Environ*, 336, 25-43.
- Greenfield B.K. & Jahn A. (2010). Mercury in San Francisco Bay forage fish. *Environ. Pollut.*, 158, 2716-2724.
- Guruge K.S. & Tanabe S. (2001). Contamination by persistent organochlorines and butyltin compounds in the west coast of Sri Lanka. *Mar Pollut Bull*, 42, 179-186.
- Guruge K.S. & Tanabe S. (2004). Polychlorinated dibenzo-p-dioxins, dibenzofurans and dioxin-like biphenyls in biota from Sri Lankan coast. *Mar Pollut Bull*, 48, 1004-1008.
- Gutierrez-Mejia E., Lares M.L. & Sosa-Nishizaki O. (2009). Mercury and arsenic in muscle and liver of the golden cownose ray, *Rhinoptera steindachneri*, Evermann and Jenkins, 1891, from the Upper Gulf of California, Mexico. *Bulletin of Environmental Contamination and Toxicology*, 83, 230-234.
- Hammerschmidt C.R. & Fitzgerald W.F. (2006). Bioaccumulation and trophic transfer of methylmercury in Long Island Sound. *Archives of Environmental Contamination and Toxicology*, 51, 416-424.
- Hardell S., Tilander H., Welfinger-Smith G., Burger J. & Carpenter D.O. (2010). Levels of polychlorinated biphenyls (PCBs) and three organochlorine pesticides in fish from the Aleutian Islands of Alaska. *Plos One*, 5.
- Harding G., Dalziel J. & Vass P. (2004). Prevalence and bioaccumulation of methylmercury in the food web of the Bay of Fundy, Gulf of Maine. In: *6th Bay of Fundy Workshop* (eds. Percy J, Evans A, Wells P & Rolston S). Environment Canada Nova Scotia, pp. 76-77.
- Harding G.C., LeBlanc R.J., Vass W.P., Addison R.F., Hargrave B.T., Pearre S., Dupuis A. & Brodie P.F. (1997). Bioaccumulation of polychlorinated biphenyls (PCBs) in the marine pelagic food web, based on a seasonal study in the southern Gulf of St. Lawrence, 1976-1977. *Marine Chemistry*, 56, 145-179.
- Harmelin-Vivien M., Bodiguel X., Charmasson S., Loizeau V., Mellon-Duval C., Tronczynski J. & Cossa D. (2012). Differential biomagnification of PCB, PBDE, Hg and radiocesium in the food web of the European hake from the NW Mediterranean. *Mar Pollut Bull*, 64, 974-983.
- Heintz R., Krahn M.M., Vlitalo G.M. & Morado F. (2006). *Organochlorines in walleye pollock from the Bering Sea and Southeastern Alaska*.
- Hellou J., Fancey L.L. & Payne J.F. (1992a). Concentrations of 24 elements in bluefin tuna, *Thunnus thynnus* from the northwest Atlantic. *Chemosphere*, 24, 211-218.
- Hellou J., Warren W.G., Payne J.F., Belkhole S. & Lobel P. (1992b). Heavy metals and other elements in 3 tissues of cod, *Gadus morhua* from the northwest Atlantic. *Mar Pollut Bull*, 24, 452-458.
- Hermanussen S., Matthews V., Paepke O., Limpus C.J. & Gaus C. (2008). Flame retardants (PBDEs) in marine turtles, dugongs and seafood from Queensland, Australia. *Mar Pollut Bull*, 57, 409-418.
- Hisamichi Y., Haraguchi K. & Endo T. (2012). Levels of mercury and organohalogen compounds in Pacific bluefin tuna (*Thunnus orientalis*) cultured in different regions of Japan. *Archives of Environmental Contamination and Toxicology*, 62, 296-305.

- Hoekstra P.F., O'Hara T.M., Fisk A.T., Borga K., Solomon K.R. & Muir D.C.G. (2003). Trophic transfer of persistent organochlorine contaminants (OCs) within an Arctic marine food web from the southern Beaufort-Chukchi Seas. *Environ. Pollut.*, 124, 509-522.
- Holden A., She J., Tanner M., Lunder S., Sharp R.e. & Hooper K. (2003). PBDEs in the San Francisco Bay area: Measurements in fish. *Organohalogen Compounds*, 61, 4.
- Hong C.S., Bush B. & Xiao J. (1992). Coplanar PCBs in fish and mussels from marine and estuarine waters of New York state. *Ecotoxicology and Environmental Safety*, 23, 118-131.
- Hueter R.E., Fong W.G., Henderson G., French M.F. & Manire C.A. (1995). Methylmercury concentration in shark muscle by species, size and distribution of sharks in Florida coastal waters. *Water Air and Soil Pollution*, 80, 893-899.
- Ikemoto T., Tu N.P.C., Watanabe M.X., Okuda N., Omori K., Tanabe S., Tuyen B.C. & Takeuchi I. (2008). Analysis of biomagnification of persistent organic pollutants in the aquatic food web of the Mekong Delta, South Vietnam using stable carbon and nitrogen isotopes. *Chemosphere*, 72, 104-114.
- Ikonomou M.G., Teas H.J., Gerlach R., Higgs D. & Addison R.F. (2011). Residues of PBDEs in northeastern Pacific marine fish: Evidence for spatial and temporal trends. *Environ Toxicol Chem*, 30, 1261-1271.
- Impellizzeri G., Tringali C., Chillemi R. & Piattelli M. (1982). Observations on the levels of DDTs and PCBs in the central Mediterranean. *Sci Total Environ*, 25, 169-179.
- Jacobs M.N., Covaci A. & Schepens P. (2002). Investigation of selected persistent organic pollutants in farmed Atlantic salmon (*Salmo salar*), salmon aquaculture feed, and fish oil components of the feed. *Environ Sci Technol*, 36, 2797-2805.
- Jaeger I., Hop H. & Gabrielsen G.W. (2009). Biomagnification of mercury in selected species from an Arctic marine food web in Svalbard. *Sci Total Environ*, 407, 4744-51.
- Jardine L.B., Burt M.D.B., Arp P.A. & Diamond A.W. (2009). Mercury comparisons between farmed and wild Atlantic salmon (*Salmo salar* L.) and Atlantic cod (*Gadus morhua* L.). *Aquac Res*, 40, 1148-1159.
- Jarvis E., Schiff K., Sabin L. & Allen M.J. (2007). Chlorinated hydrocarbons in pelagic forage fishes and squid of the Southern California Bight. *Environ Toxicol Chem*, 26, 2290-2298.
- Johnson L.L., Ylitalo G.M., Arkoosh M.R., Kagle A.N., Stafford C., Bolton J.L., Buzitis J., Anulacion B.F. & Collier T.K. (2007). Contaminant exposure in outmigrant juvenile salmon from Pacific Northwest estuaries of the United States. *Environ Monit Assess*, 124, 167-94.
- Johnson-Restrepo B., Kannan K., Addink R. & Adams D.H. (2005). Polybrominated diphenyl ethers and polychlorinated biphenyls in a marine foodweb of coastal Florida. *Environ Sci Technol*, 39, 8243-8250.
- Jothy A.A., Huschenbeth E. & Harms U. (1983). On the detection of heavy metals, organochlorine pesticides and polychlorinated biphenyls in fish and shellfish from the coastal waters of peninsular Malaysia. *Archiv Fur Fischereiwissenschaft*, 33, 161-206.
- Julshamn K., Lundebye A.K., Heggstad K., Berntssen M.H.G. & Boe B. (2004). Norwegian monitoring programme on the inorganic and organic contaminants in fish caught in the Barents Sea, Norwegian Sea and North Sea, 1994-2001. *Food Addit Contam*, 21, 365-376.
- Kannan K., Nakata H., Stafford R., Masson G.R., Tanabe S. & Giesy J.P. (1998). Bioaccumulation and toxic potential of extremely hydrophobic polychlorinated biphenyl congeners in biota collected at a superfund site contaminated with Aroclor 1268. *Environ Sci Technol*, 32, 1214-1221.

- Kannan K., Smith R.G.J., Lee R.F., Windom H.L.H., P. T., Macauley J.M. & Summers J.K. (1998). Distribution of total mercury and methylmercury in water, sediment, and fish from south Florida estuaries. *Archives of Environmental Contamination and Toxicology*, 34, 109-118.
- Kannan N., Choi H.K., Hong S.H., Oh J.R. & Shim W.J. (2010). Occurrence and biological fate of persistent organic contaminants in Yellow Sea fish. *EnvironmentAsia*, 3, 20-31.
- Karouna-Renier N.K., Snyder R.A., Lange T., Gibson S., Allison J.G., Wagner M.E. & Ranga Rao K. (2011). Largemouth bass (*Micropterus salmoides*) and striped mullet (*Mugil cephalus*) as vectors of contaminants to human consumers in northwest Florida. *Marine Environmental Research*, 72, 96-104.
- Kehrig H.D.A., Costa M., Moreira I. & Malm O. (2001). Methylmercury and total mercury in estuarine organisms from Rio de Janeiro, Brazil. *Environ Sci Pollut R*, 8, 275-279.
- Kelly B.C., Gray S.L., Ikonomou M.G., MacDonald J.S., Bandiera S.M. & Hrycay E.G. (2007). Lipid reserve dynamics and magnification of persistent organic pollutants in spawning sockeye salmon (*Oncorhynchus nerka*) from the Fraser River, British Columbia. *Environ Sci Technol*, 41, 3083-3089.
- Kelly B.C., Ikonomou M.G., Blair J.D. & Gobas F.A.P.C. (2008). Bioaccumulation behaviour of polybrominated diphenyl ethers (PBDEs) in a Canadian Arctic marine food web. *Sci Total Environ*, 401, 60-72.
- Kennish M.J. & Ruppel B.E. (1996). Polychlorinated biphenyl contamination in selected estuarine and coastal marine finfish and shellfish of New Jersey. *Estuaries*, 19, 288-295.
- Kennish M.J. & Ruppel B.E. (1998). Organochlorine contamination in selected estuarine and coastal marine finfish and shellfish of New Jersey. *Water Air and Soil Pollution*, 101, 123-136.
- Khoshnoud M., Mobinia K., Javidniab K., Hosseinkhezric P. & Jamshidc K. (2011). Heavy Metals (Zn, Cu, Pb, Cd and Hg) Contents and Fatty Acids Ratios in Two Fish Species (*Scomberomorus commerson* and *Otolithes ruber*) of the Persian Gulf. *Iranian Journal of Pharmaceutical Sciences* 7, 191-196.
- Koenig S., Huertas D. & Fernandez P. (2013). Legacy and emergent persistent organic pollutants (POPs) in NW Mediterranean deep-sea organisms. *Sci Total Environ*, 443, 358-366.
- Koistinen J., Kiviranta H., Ruokojarvi P., Parmanne R., Verta M., Hallikainen A. & Vartiainen T. (2008). Organohalogen pollutants in herring, from the northern Baltic Sea: Concentrations, congener profiles, and explanatory factors. *Environ. Pollut.*, 154, 172-183.
- Kojadinovic J., Potier M., Le Corre M., Cosson R.P. & Bustamante P. (2006). Mercury content in commercial pelagic fish and its risk assessment in the Western Indian Ocean. *Sci Total Environ*, 366, 688-700.
- Kojadinovic J., Potier M., Le Corre M., Cosson R.P. & Bustamante P. (2007). Bioaccumulation of trace elements in pelagic fish from the Western Indian Ocean. *Environ. Pollut.*, 146, 548-566.
- Kraepiel A.M., Keller K., Chin H.B., Malcolm E.G. & Morel F.M. (2003). Sources and variations of mercury in tuna. *Environ Sci Technol*, 37, 5551-8.
- Kueh C.S.W. & Lam J.Y.C. (2008). Monitoring of toxic substances in the Hong Kong marine environment. *Mar Pollut Bull*, 57, 744-757.
- Kumar M., Aalbersberg B. & Mosley L. (2004). Mercury levels in Fijian seafoods and potential health implications: Report for World Health Organization. In.
- Kutter V.T., Mirlean N., Baisch P.R.M., Kutter M.T. & Silva E. (2009). Mercury in freshwater, estuarine, and marine fishes from Southern Brazil and its ecological implication. *Environ Monit Assess*, 159, 35-42.

- Kuzyk Z.A., Stow J.P., Burgess N.M., Solomon S.M. & Reimer K.J. (2005). PCBs in sediments and the coastal food web near a local contaminant source in Saglek Bay, Labrador. *Sci Total Environ*, 351, 264-284.
- Kwasniak J., Falkowska L. & Kwasniak M. (2012). The assessment of organic mercury in Baltic fish by use of an in vitro digestion model. *Food Chem*, 132, 752-758.
- Leah R.T., Johnson M.S., Connor L. & Levene C. (1997). Polychlorinated biphenyls in fish and shellfish from the Mersey Estuary and Liverpool Bay. *Marine Environmental Research*, 43, 345-358.
- Lee J.S., Tanabe S., Takemoto N. & Kubodera T. (1997). Organochlorine residues in deep-sea organisms from Suruga Bay, Japan. *Mar Pollut Bull*, 34, 250-258.
- Li Q., Yan C., Luo Z. & Zhang X. (2010). Occurrence and levels of polybrominated diphenyl ethers (PBDEs) in recent sediments and marine organisms from Xiamen offshore areas, China. *Mar Pollut Bull*, 60, 464-469.
- Licata P., Trombetta D., Cristani M., Naccari C., Martino D., Calo M. & Naccari F. (2005). Heavy metals in liver and muscle of bluefin tuna (*Thunnus thynnus*) caught in the straits of Messina (Sicily, Italy). *Environ Monit Assess*, 107, 239-248.
- Linko R.R. & Terho K. (1977). Occurrence of methylmercury in pike and Baltic herring from Turku Archipelago. *Environ. Pollut.*, 14, 227-235.
- Lo Turco V., Di Bella G., La Pera L., Conte F., Macri B. & mo Dugo G. (2007). Organochlorine pesticides and polychlorinated biphenyl residues in reared and wild *Dicentrarchus labrax* from the Mediterranean Sea (Sicily, Italy). *Environ Monit Assess*, 132, 411-417.
- Losada S., Roach A., Roosens L., Santos F.J., Galceran M.T., Vetter W., Neels H. & Covaci A. (2009). Biomagnification of anthropogenic and naturally-produced organobrominated compounds in a marine food web from Sydney Harbour, Australia. *Environment International*, 35, 1142-1149.
- Luckhurst B.E., Prince E.D., Llopiz J.K., Snodgrass D. & Brothers E.B. (2006). Evidence of blue marlin (*Makaira nigricans*) spawning in Bermuda waters and elevated mercury levels in large specimens. *B Mar Sci*, 79, 691-704.
- Magalhaes M.C., Costa V., Menezes G.M., Pinho M.R., Santos R.S. & Monteiro L.R. (2007). Intra- and inter-specific variability in total and methylmercury bioaccumulation by eight marine fish species from the Azores. *Mar Pollut Bull*, 1654-1661.
- Marcovecchio J.E., Moreno V.J. & Perez A. (1986). Biomagnification of total mercury in Bahia-Blanca Estuary shark. *Mar Pollut Bull*, 17, 276-278.
- Marcovecchio J.E., Moreno V.J. & Perez A. (1991). Metal accumulation in tissues of sharks from the Bahia Blanca Estuary, Argentina. *Marine Environmental Research*, 31, 263-274.
- Marsico E.T., Machado M.E.S., Knoff M. & Clemente S.C.S. (2007). Total mercury in sharks along the southern Brazilian Coast. *Arq Bras Med Vet Zoo*, 59, 1593-1596.
- Martinez-Gomez C., Fernandez B., Benedicto J., Valdes J., Campillo J.A., Leon V.M. & Vethaak A.D. (2012). Health status of red mullets from polluted areas of the Spanish Mediterranean coast, with special reference to Portman (SE Spain). *Marine Environmental Research*, 77, 50-59.
- Masmoudi W., Romdhane M.S., Kheriji S. & El Cafsi M.h. (2007). Polychlorinated biphenyl residues in the golden grey mullet (*Liza aurata*) from Tunis Bay, Mediterranean sea (Tunisia). *Food Chem*, 105, 72-76.
- Mason R.P., Heyes D. & Sveinsdottir A. (2006). Methylmercury concentrations in fish from tidal waters of the Chesapeake Bay. *Archives of Environmental Contamination and Toxicology*, 51, 425-437.

- Matthews V., Papke O. & Gaus C. (2008). PCDD/Fs and PCBs in seafood species from Moreton Bay, Queensland, Australia. *Mar Pollut Bull*, 57, 392-402.
- McArthur T., Butler E.C.V. & Jackson G.D. (2003). Mercury in the marine food chain in the Southern Ocean at Macquarie Island: an analysis of a top predator, Patagonian toothfish (*Dissostichus eleginoides*) and a mid-trophic species, the warty squid (*Moroteuthis ingens*). *Polar Biol*, 27, 1-5.
- Meador J.P., Ernest D.W. & Kagley A.N. (2005). A comparison of the non-essential elements cadmium, mercury, and lead found in fish and sediment from Alaska and California. *Sci Total Environ*, 339, 189-205.
- Menasveta P. & Siriyong R. (1977). Mercury content of several predacious fish in the Andaman sea. *Mar Pollut Bull*, 8, 5.
- Mendez E., Giudice H., Pereira A., Inocente G. & Medina D. (2001). Total mercury content - Fish weight relationship in swordfish (*Xiphias gladius*) caught in the southwest Atlantic Ocean. *J Food Compos Anal*, 14, 453-460.
- Meng X.-Z., Guo Y., Mai B.-X. & Zeng E.Y. (2009). Enantiomeric signatures of chiral organochlorine pesticides in consumer fish from South China. *J Agr Food Chem*, 57, 4299-4304.
- Minganti V., Drava G., De Pellegrini R. & Siccardi C. (2010). Trace elements in farmed and wild gilthead seabream, *Sparus aurata*. *Mar Pollut Bull*, 60, 2022-5.
- Mizukawa K., Takada H., Takeuchi I., Ikemoto T., Omori K. & Tsuchiya K. (2009). Bioconcentration and biomagnification of polybrominated diphenyl ethers (PBDEs) through lower-trophic-level coastal marine food web. *Mar Pollut Bull*, 58, 1217-1224.
- Moisey J., Fisk A.T., Hobson K.A. & Norstrom R.J. (2001). Hexachlorocyclohexane (HCH) isomers and chiral signatures of alpha-HCH in the arctic marine food web of the Northwater Polynya. *Environ Sci Technol*, 35, 1920-1927.
- Mol J.H., Ramlal J.S., Lietar C. & Verloo M. (2001). Mercury contamination in freshwater, estuarine, and marine fishes in relation to small-scale gold mining in Suriname, South America. *Environ Res*, 86, 183-197.
- Mondon J.A., Nowak B.F. & Sodergren A. (2001). Persistent organic pollutants in oysters *Crassostrea gigas* and sand flathead *Platycephalus bassensis* from Tasmanian estuarine and coastal waters. *Mar Pollut Bull*, 42, 157-161.
- Monirith I., Nakata H., Tanabe S. & Tana T.S. (1999). Persistent organochlorine residues in marine and freshwater fish in Cambodia. *Mar Pollut Bull*, 38, 604-612.
- Monod J.L., Arnaud P.M. & Arnoux A. (1995). PCB congeners in the marine biota of Saint-Paul and Amsterdam islands, southern Indian Ocean. *Mar Pollut Bull*, 30, 272-274.
- Monosson E., Ashley J.T.F., McElroy A.E., Woltering D. & Elskus A.A. (2003). PCB congener distributions in muscle, liver and gonad of *Fundulus heteroclitus* from the lower Hudson River Estuary and Newark Bay. *Chemosphere*, 52, 777-787.
- Monteiro L.R. & Lopes H.D. (1990). Mercury content of swordfish, *Xiphias gladius*, in relation to length, weight, age, and sex. *Mar Pollut Bull*, 21, 293-296.
- Muir D., Savinova T., Savinov V., Alexeeva L., Potelov V. & Svetochev V. (2003). Bioaccumulation of PCBs and chlorinated pesticides in seals, fishes and invertebrates from the White Sea, Russia. *Sci Total Environ*, 306, 111-131.
- Munshi A.B., Boardman G.D., Flick G.J., Cobb J. & Lane R.M. (2009). Pesticides (OCPS) and polychlorinated biphenyls (PCBs) concentration in various fish species along the Chesapeake Bay near Virginia Beach on the Atlantic coastline. *Open Oceanography Journal*, 3, 1-7.

- Munshi A.B., Hina A.S. & Usmani T.H. (2005). Determination of the level of PCBs in small fishes from three different coastal areas of Karachi, Pakistan. *Pakistan Journal of Scientific and Industrial Research*, 48, 247-251.
- Nadal M., Ferre-Huguet N., Marti-Cid R., Schuhmacher M. & Domingo J.L. (2008). Exposure to metals through the consumption of fish and seafood by the population living near the Ebro River in Catalonia, Spain: Health risks. *Hum Ecol Risk Assess*, 14, 780-795.
- Naito W., Jin H.C., Kang Y.S., Yamamuro M., Masunaga S. & Nakanishi J. (2003). Dynamics of PCDDs/DFs and coplanar-PCBs in an aquatic food chain of Tokyo Bay. *Chemosphere*, 53, 347-362.
- Nesto N., Romano S., Moschino V., Mauri M. & Da Ros L. (2007). Bioaccumulation and biomarker responses of trace metals and micro-organic pollutants in mussels and fish from the Lagoon of Venice, Italy. *Mar Pollut Bull*, 55, 469-484.
- Nfon E., Cousins I.T., Jarvinen O., Mukherjee A.B., Verta M. & Broman D. (2009). Trophodynamics of mercury and other trace elements in a pelagic food chain from the Baltic Sea. *Sci Total Environ*, 407, 6267-6274.
- Nicholson G.J., Theodoropoulos T. & Fabris G.J. (1994). Hydrocarbons, pesticides, PCB and PAH in Port Phillip Bay (Victoria) sand flathead. *Mar Pollut Bull*, 28, 115-120.
- Nie X.P., Lan C.Y., Wei T.L. & Yang Y.F. (2005). Distribution of polychlorinated biphenyls in the water, sediment and fish from the Pearl River estuary, China. *Mar Pollut Bull*, 50, 537-546.
- Nisbet I.C.T. & Reynolds L.M. (1984). Organochlorine residues in common terns and associated estuarine organisms, Massachusetts, USA, 1971-81. *Marine Environmental Research*, 11, 33-66.
- Okumura Y., Kohno Y., Kamiyama T., Suzuki T. & Yamashita Y. (2005). Dioxin concentrations in marbled sole collected from Sendai Bay, Japan. *Mer (Tokyo)*, 43, 75-87.
- Okumura Y., Yamashita Y. & Isagawa S. (2004). Concentrations of polychlorinated dibenzo-p-dioxins, dibenzofurans, non-ortho polychlorinated biphenyls, and mono-ortho polychlorinated biphenyls in Japanese flounder, with reference to the relationship between body length and concentration. *J Environ Monitor*, 6, 201-208.
- O'Neill S.M. & West J.E. (2009). Marine distribution, life history traits, and the accumulation of polychlorinated biphenyls in chinook salmon from Puget Sound, Washington. *Transactions of the American Fisheries Society*, 138, 616-632.
- Orbea A., Ortiz-Zarragoitia M., Sole M., Porte C. & Cajaraville M.P. (2002). Antioxidant enzymes and peroxisome proliferation in relation to contaminant body burdens of PAHs and PCBs in bivalve molluscs, crabs and fish from the Urdaibai and Plentzia estuaries (Bay of Biscay). *Aquatic Toxicology*, 58, 75-98.
- Paasivirta J. & Linko R. (1980). Environmental toxins in Finnish wildlife - A study on time trends of residue contents in fish during 1973-1978. *Chemosphere*, 9, 643-661.
- Padula D.J., Daughtry B.J. & Nowak B.F. (2008). Dioxins, PCBs, metals, metalloids, pesticides and antimicrobial residues in wild and farmed Australian southern bluefin tuna (*Thunnus maccoyii*). *Chemosphere*, 72, 34-44.
- Pandelova M., Henkelmann B., Roots O., Simm M., Jaerv L., Benfenati E. & Schramm K.W. (2008). Levels of PCDD/F and dioxin-like PCB in Baltic fish of different age and gender. *Chemosphere*, 71, 369-378.
- Papetti P. & Rossi G. (2009). Heavy metals in the fishery products of low Lazio and the use of metallothionein as a biomarker of contamination. *Environ Monit Assess*, 159, 589-598.

- Parera J., Abalos M., Santos F.J., Galceran M.T. & Abad E. (2013). Polychlorinated dibenzo-p-dioxins, dibenzofurans, biphenyls, paraffins and polybrominated diphenyl ethers in marine fish species from Ebro River Delta (Spain). *Chemosphere*, 93, 499-505.
- Pastor A., Hernandez F., Peris M.A., Beltran J., Sancho J.V. & Castillo M.T. (1994). Levels of heavy metals in some marine organisms from the western Mediterranean area (Spain). *Mar Pollut Bull*, 28, 50-53.
- Pastor D., Boix J., Fernandez V. & Albaiges J. (1996). Bioaccumulation of organochlorinated contaminants in three estuarine fish species (*Mullus barbatus*, *Mugil cephalus* and *Dicentrarchus labrax*). *Mar Pollut Bull*, 32, 257-262.
- Paul M.C., Toia R.F. & von Nagy-Felsobuki E.I. (2003). A novel method for the determination of mercury and selenium in shark tissue using high-resolution inductively coupled plasma-mass spectrometry. *Spectrochim Acta B*, 58, 1687-1697.
- Payne E.J. & Taylor D.L. (2010). Effects of diet composition and trophic structure on mercury bioaccumulation in temperate flatfishes. *Archives of Environmental Contamination and Toxicology*, 58, 431-443.
- Pena-Abaurrea M., Weijs L., Ramos L., Borghesi N., Corsolini S., Neels H., Blust R. & Covaci A. (2009). Anthropogenic and naturally-produced organobrominated compounds in bluefin tuna from the Mediterranean Sea. *Chemosphere*, 76, 1477-1482.
- Perttila M., Tervo V. & Parmanne R. (1982). Age dependence of the concentrations of harmful substances in Baltic herring (*Clupea harengus*). *Chemosphere*, 11, 1019-1026.
- Perugini M., Cavaliere M., Giammarino A., Mazzone P., Olivieri V. & Amorena M. (2004). Levels of polychlorinated biphenyls and organochlorine pesticides in some edible marine organisms from the Central Adriatic Sea. *Chemosphere*, 57, 391-400.
- Picer M., Picer N. & Ahel M. (1978). Chlorinated insecticide and PCB residues in fish and mussels of east coastal waters of the middle and north Adriatic sea, 1974-75. *Pesticides Monitoring Journal*, 12, 102-112.
- Pinto B., Garritano S.L., Cristofani R., Ortaggi G., Giuliano A., Amodio-Cocchieri R., Cirillo T., De Giusti M., Boccia A. & Reali D. (2008). Monitoring of polychlorinated biphenyl contamination and estrogenic activity in water, commercial feed and farmed seafood. *Environ Monit Assess*, 144, 445-453.
- Piraino M.N. & Taylor D.L. (2009). Bioaccumulation and trophic transfer of mercury in striped bass (*Morone saxatilis*) and tautog (*Tautoga onitis*) from the Narragansett Bay (Rhode Island, USA). *Marine Environmental Research*, 67, 117-128.
- Polak-Juszczak L. (2009). Temporal trends in the bioaccumulation of trace metals in herring, sprat, and cod from the southern Baltic Sea in the 1994-2003 period. *Chemosphere*, 76, 1334-1339.
- Porte C. & Albaiges J. (1994). Bioaccumulation patterns of hydrocarbons and polychlorinated biphenyls in bivalves, crustaceans, and fishes. *Archives of Environmental Contamination and Toxicology*, 26, 273-281.
- Quinete N., Lavandier R., Dias P., Taniguchi S., Montone R. & Moreira I. (2011). Specific profiles of polybrominated diphenylethers (PBDEs) and polychlorinated biphenyls (PCBs) in fish and tucuxi dolphins from the estuary of Paraiba do Sul River, Southeastern Brazil. *Mar Pollut Bull*, 62, 440-446.
- Ramu K., Kajiwara N., Mochizuki H., Miyasaka H., Asante K.A., Takahashi S., Ota S., Yeh H.M., Nishida S. & Tanabe S. (2006). Occurrence of organochlorine pesticides, polychlorinated biphenyls and

- polybrominated diphenyl ethers in deep-sea fishes from the Sulu Sea. *Mar Pollut Bull*, 52, 1827-1832.
- Ravid R., Benyosef J. & Hornung H. (1985). PCBs, DDTs and other chlorinated hydrocarbons in marine organisms from the Mediterranean coast of Israel. *Mar Pollut Bull*, 16, 35-38.
- Rider S.J. & Adams D.H. (2000). Mercury concentration in spotted seatrout (*Cynoscion nebulosus*) from northwest Florida. *Gulf of Mexico Science*, 2, 97-103.
- Riget F., Moller P., Dietz R., Nielsen T.G., Asmund G., Strand J., Larsen M.M. & Hobson K.A. (2007). Transfer of mercury in the marine food web of West Greenland. *J Environ Monitor*, 9, 877-883.
- Rivers J.B., Pearson J.E. & Stultz C.D. (1972). Total and organic mercury in marine fish. *Bulletin of Environmental Contamination and Toxicology*, 3, 255-266.
- Rochman C.M., Lewison R.L., Eriksen M., Allen H., Cook A.-M. & Teh S.J. (2014). Polybrominated diphenyl ethers (PBDEs) in fish tissue may be an indicator of plastic contamination in marine habitats. *Sci Total Environ*, 476, 622-633.
- Romeo M., Siau Y., Sidoumou Z. & Gnassia-Barelli M. (1999). Heavy metal distribution in different fish species from the Mauritania coast. *Sci Total Environ*, 232, 169-175.
- Roots O., Holoubek I. & Zitko V. (2003). Polychlorinated biphenyls and chlororganic pesticides patterns in perch (*Perca fluviatilis*). *Fresen Environ Bull*, 12, 883-900.
- Ruelas-Inzunza J., Meza-Lopez G. & Paez-Osuna F. (2008). Mercury in fish that are of dietary importance from the coasts of Sinaloa (SE Gulf of California). *J Food Compos Anal*, 21, 211-218.
- Ruelas-Inzunza J. & Paez-Osuna F. (2005). Mercury in fish and shark tissues from two coastal lagoons in the gulf of California, Mexico. *Bulletin of Environmental Contamination and Toxicology*, 74, 294-300.
- Saei-Dehkordi S.S., Fallah A.A. & Nematollahi A. (2010). Arsenic and mercury in commercially valuable fish species from the Persian Gulf: Influence of season and habitat. *Food Chem Toxicol*, 48, 2945-2950.
- Said T.O. (2007). Determination of persistent organic pollutants in sediment and fish of the western coast of Alexandria, Egypt. *Chemistry and Ecology*, 23, 289-302.
- Sajwan K., Nune S., Richardson J., Senthilkumar K. & Loganathan B. (2006). Contamination profiles of persistent organochlorines and polybrominated diphenyl ethers in fish from coastal waters off Savannah, GA, USA. *Organohalogen Compounds*, 68, 4.
- Salama A.A., Mohamed M.A.M., Duval B., Potter T.L. & Levin R.E. (1998). Polychlorinated biphenyl concentration in raw and cooked North Atlantic bluefish (*Pomatomus saltatrix*) fillets. *J Agr Food Chem*, 46, 1359-1362.
- Sapota G. & Wisniewska-Wojtasik B. (2007). Persistent organic pollutant content in cod (*Gadus morhua* L.) from the Barents Sea region. *Oceanological and Hydrobiological Studies*, 36, 65-77.
- Satsmadjis J. & Gabrielides G.P. (1979). Observations on the concentration levels of chlorinated hydrocarbons in a Mediterranean fish. *Mar Pollut Bull*, 10, 109-111.
- Satsmadjis J., Georgakopoulosgregoriades E. & Voutsinoualiadouri F. (1988). Red mullet contamination by PCBs and chlorinated pesticides in the Pagassitikos Gulf, Greece. *Mar Pollut Bull*, 19, 136-138.
- Senn D.B., Chesney E.J., Blum J.D., Bank M.S., Maage A. & Shine J.P. (2010). Stable isotope (N, C, Hg) study of methylmercury sources and trophic transfer in the northern Gulf of Mexico. *Environ Sci Technol*, 44, 1630-1637.



- Serrano R., Barreda M. & Blanes M.A. (2008). Investigating the presence of organochlorine pesticides and polychlorinated biphenyls in wild and farmed gilthead sea bream (*Sparus aurata*) from the Western Mediterranean sea. *Mar Pollut Bull*, 56, 963-972.
- Shaw G.R. & Connell D.W. (1982). Factors influencing concentrations of polychlorinated biphenyls in organisms from an estuarine ecosystem. *Aust J Mar Fresh Res*, 33, 1057-1070.
- Shaw S.D., Berger M.L., Brenner D., Kannan K., Lohmann N. & Paepke O. (2009). Bioaccumulation of polybrominated diphenyl ethers and hexabromocyclododecane in the northwest Atlantic marine food web. *Sci Total Environ*, 407, 3323-3329.
- Shi J., Li Y., Liang H., Zheng G.J., Wu Y. & Liu W. (2013). OCPs and PCBs in marine edible fish and human health risk assessment in the eastern Guangdong, China. *Archives of Environmental Contamination and Toxicology*, 64, 632-642.
- Shultz C.D. & Crear D. (1976). Distribution of total and organic mercury in 7 tissues of Pacific blue marlin, *Makaira nigricans*. *Pac Sci*, 30, 101-107.
- Sivaperumal P., Sankar T. & Viswanathannair P. (2007). Heavy metal concentrations in fish, shellfish and fish products from internal markets of India vis-a-vis international standards. *Food Chem*, 102, 612-620.
- Soto-Jimenez M.F., Amezcua F. & Gonzalez-Ledesma R. (2010). Nonessential metals in striped marlin and Indo-Pacific sailfish in the southeast Gulf of California, Mexico: Concentration and assessment of human health risk. *Archives of Environmental Contamination and Toxicology*, 58, 810-818.
- Staudinger M.D. (2011). Species- and size-specific variability of mercury concentrations in four commercially important finfish and their prey from the northwest Atlantic. *Mar Pollut Bull*, 62, 734-740.
- Stefanelli P., Ausili A., Ciuffa G., Colasanti A., Di Muccio S. & Morlino R. (2002). Investigation of polychlorobiphenyls and organochlorine pesticides in tissues of tuna (*Thunnus Thunnus thynnus*) from the Mediterranean Sea in 1999. *Bulletin of Environmental Contamination and Toxicology*, 69, 800-807.
- Stefanelli P., Di Muccio A., Ferrara F., Barbini D.A., Generali T., Pelosi P., Amendola G., Vanni F., Di Muccio S. & Ausili A. (2004). Estimation of intake of organochlorine pesticides and chlorobiphenyls through edible fishes from the Italian Adriatic Sea during 1997. *Food Control*, 15, 27-38.
- Steimle F.W., Zdanowicz V.S. & Gadbois D.F. (1990). Metals and organic contaminants in northwest Atlantic deep-sea tilefish tissues. *Mar Pollut Bull*, 21, 530-535.
- Stephansen D.A., Svendsen T.C., Vorkamp K. & Frier J.-O. (2012). Changes in patterns of persistent halogenated compounds through a pelagic food web in the Baltic Sea. *Marine Environmental Research*, 73, 17-24.
- Storelli M.M., Barone G. & Marcotrigiano G.O. (2007). Residues of polychlorinated biphenyls in edible fish of the Adriatic Sea: Assessment of human exposure. *Journal of Food Science*, 72, C183-C187.
- Storelli M.M., Barone G., Piscitelli G. & Marcotrigiano G.O. (2007). Mercury in fish: concentration vs. fish size and estimates of mercury intake. *Food Addit Contam*, 24, 1353-7.
- Storelli M.M., Ceci E., Storelli A. & Marcotrigiano G.O. (2003). Polychlorinated biphenyl, heavy metal and methylmercury residues in hammerhead sharks: contaminant status and assessment. *Mar Pollut Bull*, 46, 1035-1039.

- Storelli M.M., Giacomini-Stuffler R. & Marcotrigiano G.O. (1998). Total mercury in muscle of benthic and pelagic fish from the South Adriatic Sea (Italy). *Food Addit Contam*, 15, 876-83.
- Storelli M.M., Giacomini-Stuffler R. & Marcotrigiano G.O. (2002). Total and methylmercury residues in cartilaginous fish from Mediterranean Sea. *Mar Pollut Bull*, 44, 1354-1358.
- Storelli M.M., Giacomini-Stuffler R., Storelli A., D'Addabbo R., Palermo C. & Marcotrigiano G.O. (2003). Survey of total mercury and methylmercury levels in edible fish from the Adriatic Sea. *Food Addit Contam*, 20, 1114-9.
- Storelli M.M., Giacomini-Stuffler R., Storelli A. & Marcotrigiano G.O. (2005). Accumulation of mercury, cadmium, lead and arsenic in swordfish and bluefin tuna from the Mediterranean Sea: A comparative study. *Mar Pollut Bull*, 50, 1004-1007.
- Storelli M.M. & Marcotrigiano G.O. (2001). Persistent organochlorine residues and toxic evaluation of polychlorinated biphenyls in sharks from the Mediterranean Sea (Italy). *Mar Pollut Bull*, 42, 1323-1329.
- Storelli M.M., Perrone V.G., Busco V.P., Spedicato D. & Barone G. (2012). Persistent Organic Pollutants (PCBs and DDTs) in European Conger Eel, Conger conger L., from the Ionian Sea (Mediterranean Sea). *Bulletin of Environmental Contamination and Toxicology*, 88, 928-932.
- Storelli M.M., Stuffler R.G. & Marcotrigiano G.O. (2002). Total and methylmercury residues in tuna-fish from the Mediterranean sea. *Food Addit Contam*, 19, 715-720.
- Strandberg B., Bandh C., van Bavel B., Bergqvist P.A., Broman D., Ishaq R., Naf C. & Rappe C. (2000). Organochlorine compounds in the Gulf of Bothnia: sediment and benthic species. *Chemosphere*, 40, 1205-1211.
- Strid A., Athanassiadis I., Athanasiadou M., Svavarsson J., Papke O. & Bergman A. (2010). Neutral and phenolic brominated organic compounds of natural and anthropogenic origin in northeast Atlantic Greenland shark (*Somniosus microcephalus*). *Environ Toxicol Chem*, 29, 2653-2659.
- Strom D.G. & Graves G.A. (2001). A comparison of mercury in estuarine fish between Florida Bay and the Indian River Lagoon, Florida, USA. *Estuaries*, 24, 597-609.
- Suk S.H., Smith S.E. & Ramon D.A. (2009). Bioaccumulation of mercury in pelagic sharks from the northeast Pacific Ocean. *California Cooperative Oceanic Fisheries Investigations Reports*, 50, 172-177.
- Sun Y.-X., Hao Q., Xu X.-R., Luo X.-J., Wang S.-L., Zhang Z.-W. & Mai B.-X. (2014). Persistent organic pollutants in marine fish from Yongxing Island, South China Sea: Levels, composition profiles and human dietary exposure assessment. *Chemosphere*, 98, 84-90.
- Svendsen T.C., Vorkamp K., Ronsholdt B. & Frier J.-O. (2008). Retrospective determination of primary feeding areas of Atlantic salmon (*Salmo salar*) using fingerprinting of chlorinated organic contaminants. *Ices Journal of Marine Science*, 65, 921-929.
- Szlinder-Richert J., Barska I., Mazerski J. & Usydus Z. (2008). Organochlorine pesticides in fish from the southern Baltic Sea: Levels, bioaccumulation features and temporal trends during the 1995-2006 period. *Mar Pollut Bull*, 56, 927-940.
- Szlinder-Richert J., Barska I., Mazerski J. & Usydus Z. (2009). PCBs in fish from the southern Baltic Sea: Levels, bioaccumulation features, and temporal trends during the period from 1997 to 2006. *Mar Pollut Bull*, 58, 85-92.
- Szlinder-Richert J., Barska I., Usydus Z., Ruczynska W. & Grabic R. (2009). Investigation of PCDD/Fs and dl-PCBs in fish from the southern Baltic Sea during the 2002-2006 period. *Chemosphere*, 74, 1509-1515.

- Takahashi S., Lee J.S., Tanabe S. & Kubodera T. (1998). Contamination and specific accumulation of organochlorine and butyltin compounds in deep-sea organisms collected from Suruga Bay, Japan. *Sci Total Environ*, 214, 49-64.
- Takahashi S., Oshihoi T., Ramu K., Isobe T., Ohmori K., Kubodera T. & Tanabe S. (2010). Organohalogen compounds in deep-sea fishes from the western North Pacific, off-Tohoku, Japan: Contamination status and bioaccumulation profiles. *Mar Pollut Bull*, 60, 187-196.
- Takahashi S., Tanabe S. & Kawaguchi K. (2000). Organochlorine and butyltin residues in mesopelagic myctophid fishes from the western North Pacific. *Environ Sci Technol*, 34, 5129-5136.
- Takeuchi I., Miyoshi N., Mizukawa K., Takada H., Ikemoto T., Omori K. & Tsuchiya K. (2009). Biomagnification profiles of polycyclic aromatic hydrocarbons, alkylphenols and polychlorinated biphenyls in Tokyo Bay elucidated by delta C-13 and delta N-15 isotope ratios as guides to trophic web structure. *Mar Pollut Bull*, 58, 663-671.
- Tanabe S., Ramu K., Mochizuki H., Miyasaka H., Okuda N., Muraoka M., Kajiwara N., Takahashi S. & Kubodera T. (2005). Contamination and distribution of persistent organochlorine and organotin compounds in deep-sea organisms from East China Sea. *National Science Museum of Monographs*, 29, 24.
- Thieleke J. (1973). Mercury levels in five species of commercially important pelagic fish taken from the Pacific Ocean near Hawaii. In: University of Wisconsin Madison, WI.
- Tian S., Zhu L. & Liu M. (2010). Bioaccumulation and distribution of polybrominated diphenyl ethers in marine species from Bohai bay, China. *Environ Toxicol Chem*, 29, 2278-2285.
- Trocino A., Xiccato G., Majolini D., Tazzoli M., Tulli F., Tibaldi E., Messina C.M. & Santulli A. (2012). Levels of dioxin-like polychlorinated biphenyls (DL-PCBs) and metals in European sea bass from fish farms in Italy. *Food Chem*, 134, 333-338.
- Tyrell L., McHugh B., Glynn D., Twomey M., Joyce E., Costello J. & al. e. (2005). Trace metal concentrations in various fish species landed at selected Irish ports, 2003. In: *Marine Environment and Health Series* Abbotstown, Dublin.
- Ueno D., Alae M., Marvin C., Muir D.C.G., Macinnis G., Reiner E., Crozier P., Furdui V.I., Subramanian A., Fillmann G., Lam P.K.S., Zheng G.J., Muchtar M., Razak H., Prudente M., Chung K.-H. & Tanabe S. (2006). Distribution and transportability of hexabromocyclododecane (HBCD) in the Asia-Pacific region using skipjack tuna as a bioindicator. *Environ. Pollut.*, 144, 238-247.
- Ueno D., Watanabe M., Subramanian A.L., Tanaka H., Fillmann G., Lam P.K.S., Zheng G.J., Muchtar M., Razak H., Prudente M., Chung K.H. & Tanabe S. (2005). Global pollution monitoring of polychlorinated dibenzo-p-dioxins (PCDDs), furans (PCDFs) and coplanar polychlorinated biphenyls (coplanar PCBs) using skipjack tuna as bioindicator. *Environ. Pollut.*, 136, 303-313.
- Vandenbroek W.L.F. (1981). Concentration and distribution of mercury in flesh of orange roughy (*Hoplostethus atlanticus*). *New Zeal J Mar Fresh*, 15, 255-260.
- Vassilopoulou V. & Georgakopoulosgregoriades E. (1993). Factors influencing the uptake of PCBs and DDTs in red mullet (*Mullus barbatus*) from Pagassitikos Gulf, central Greece. *Mar Pollut Bull*, 26, 285-287.
- Viana F., Huertas R. & Danulat E. (2005). Heavy metal levels in fish from coastal waters of Uruguay. *Archives of Environmental Contamination and Toxicology*, 48, 530-537.
- Villeneuve J.P., Fowler S.W. & Anderlini V.C. (1987). Organochlorine levels in edible marine organisms from Kuwaiti coastal waters. *Bulletin of Environmental Contamination and Toxicology*, 38, 266-270.

- Voegborlo R.B., Matsuyama A., Akagi H., Adimado A.A. & Ephraim J.H. (2006). Total mercury and methylmercury accumulation in the muscle tissue of frigate (*Auxis thazard thazard*) and yellow fin (*Thunnus albacares*) tuna from the Gulf of Guinea, Ghana. *Bulletin of Environmental Contamination and Toxicology*, 76, 840-847.
- Voorspoels S., Covaci A. & Schepens P. (2003). Polybrominated diphenyl ethers in marine species from the Belgian North Sea and the western Scheldt Estuary: Levels, profiles, and distribution. *Environ Sci Technol*, 37, 4348-4357.
- Vorkamp K., Christensen J.H. & Riget F. (2004). Polybrominated diphenyl ethers and organochlorine compounds in biota from the marine environment of East Greenland. *Sci Total Environ*, 331, 143-155.
- Vuorinen P.J., Keinanen M., Kiviranta H., Koistinen J., Kiljunen M., Myllyla T., Ponni J., Peltonen H., Verta M. & Karjalainen J. (2012). Biomagnification of organohalogens in Atlantic salmon (*Salmo salar*) from its main prey species in three areas of the Baltic Sea. *Sci Total Environ*, 421, 129-143.
- Wan Y., Hu J., Zhang K. & An L. (2008). Trophodynamics of polybrominated diphenyl ethers in the marine food web of Bohai Bay, North China. *Environ Sci Technol*, 42, 1078-1083.
- Wan Y., Jin X., Hu J. & Jin F. (2007). Trophic dilution of polycyclic aromatic hydrocarbons (PAHs) in a marine food web from Bohai Bay, North China. *Environ Sci Technol*, 41, 3109-3114.
- Watling R.J., Mcclurg T.P. & Stanton R.C. (1981). Relation between mercury concentration and size in the mako shark. *Bulletin of Environmental Contamination and Toxicology*, 26, 352-358.
- Webster L., Walsham P., Russell M., Hussy I., Neat F., Dalgarno E., Packer G., Scurfield J.A. & Moffat C.F. (2011). Halogenated persistent organic pollutants in deep water fish from waters to the west of Scotland. *Chemosphere*, 83, 839-850.
- Xia C., Lam J.C.W., Wu X., Sun L., Xie Z. & Lam P.K.S. (2011). Levels and distribution of polybrominated diphenyl ethers (PBDEs) in marine fishes from Chinese coastal waters. *Chemosphere*, 82, 18-24.
- Xiang C.H., Luo X.J., Chen S.J., Yu M., Mai B.X. & Zeng E.Y. (2007). Polybrominated diphenyl ethers in biota and sediments of the Pearl River Estuary, South China. *Environ Toxicol Chem*, 26, 616-623.
- Yamashita Y., Omura Y. & Okazaki E. (2005). Total mercury and methylmercury levels in commercially important fishes in Japan. *Fisheries Sci*, 71, 1029-1035.
- Ylitalo G.M., Buzitis J. & Krahn M.M. (1999). Analyses of tissues of eight marine species from Atlantic and Pacific coasts for dioxin-like chlorobiphenyls (CBs) and total CBs. *Archives of Environmental Contamination and Toxicology*, 37, 205-219.
- Yu M., Luo X.-J., Wu J.-P., Chen S.J. & Mai B.-X. (2009). Bioaccumulation and trophic transfer of polybrominated diphenyl ethers (PBDEs) in biota from the Pearl River Estuary, South China. *Environment International*, 35, 1090-1095.
- Zauke G.P., Savinov V.M., Ritterhoff J. & Savinova T. (1999). Heavy metals in fish from the Barents Sea in (summer 1994). *Sci Total Environ*, 227, 161-173.
- Zhang K., Wan Y., An L. & Hu J. (2010). Trophodynamics of polybrominated diphenyl ethers and methoxylated polybrominated diphenyl ethers in a marine food web. *Environ Toxicol Chem*, 29, 2792-2799.
- Zhang X.M., Naidu A.S., Kelley J.J., Jewett S.C., Dasher D. & Duffy L.K. (2001). Baseline concentrations of total mercury and methylmercury in salmon returning via the Bering Sea (1999-2000). *Mar Pollut Bull*, 42, 993-997.

Zhou S., Tong L., Tang Q., Gu X., Xue B. & Liu W. (2013). Residues, sources and tissue distributions of organochlorine pesticides in dog sharks (*Mustelus griseus*) from Zhoushan Fishing Ground, China. *Mar Pollut Bull*, 73, 374-380.
